# Supplementary material for: Metal-free, one-pot synthesis of 2-styrylquinolines via Friedländer annulation and sp3 C–H activation using 1,3-dimethylurea and l-tartaric acid (3 : 1) as a deep eutectic solvent
Source: Royal Society of Chemistry journal article supplement (doi:10.1039/d1nj00132a), 2021-12-10
Supplement: d1nj00132a1.pdf [file d1nj00132a1.pdf]

## Metal-free, one-pot synthesis of styrylquinolines *via* Friedländer annulation and sp<sup>3</sup> C-H activation using 1,3-dimethylurea and L-tartaric acid (3:1) as deep eutectic solvent

Neeli Satyanarayana,<sup>a</sup> Kota Sathish,<sup>a</sup> Sakkani Nagaraju,<sup>a</sup> Ravinder Pawar,<sup>a</sup> Mohmmad Faizan,<sup>a</sup> Murgan Arumugavel,<sup>b</sup> Thangellapally Shirisha,<sup>a</sup> and Dhurke Kashinath\*<sup>a</sup>

<sup>a</sup>Department of Chemistry, National Institute of Technology, Warangal-506 004, India

<sup>b</sup>Chemistry Discipline, Indian Institute of Technology, Gandhinagar, Palaj, Gandhinagar-382355, Gujarat, India

Corresponding Author: e-mail: kashinath@nitw.ac.in; kashinath.dhurke@gmail.com

Tel. +91-870-2462677; FAX No. +91-870-2459547

| S. No. | Contents                                                                                                     | Page No. |
|--------|--------------------------------------------------------------------------------------------------------------|----------|
| 1      | Experimental Procedures                                                                                      | 1-2      |
| 2      | Physical data (Melting points) of known compounds                                                            | 2        |
| 3      | Physical (melting points) and Spectral data ( <sup>1</sup> H, <sup>13</sup> C, IR and Mass) of new compounds | 2-12     |
| 4      | <sup>1</sup> H NMR, <sup>13</sup> C NMR and Mass spectra of compounds                                        | 13-70    |
| 5      | NOESY data of compounds <b>7h</b> and <b>8a</b> , COSY data of compounds <b>5m</b> and <b>8a</b>             | 71-74    |
| 6      | Photophysical properties data of the resultant molecules                                                     | 75       |

### 1. Experimental Procedures:

**General:** The starting materials were purchased from Sigma-Aldrich, SRL, Spectrochem and SD-Fine and used as they are received. <sup>1</sup>H and <sup>13</sup>C-NMR spectra are recorded on Bruker 400 MHz spectrometer using CDCl<sub>3</sub> or DMSO-*d*<sub>6</sub> as solvents and reported in δ ppm. The mass spectra were recorded on Shimadzu LCMS-2020 and Agilent QTOF machine. Melting points were recorded on Stuart melting point apparatus. UV-visible spectra were taken using Agilent-Cary 100 UV-Visible spectrometer. Emission spectra were recorded by Horiba FluoroLog spectrophotometer.

#### *General procedure for the one-pot synthesis of styrylquinoline derivatives:*

1.53g of Deep Eutectic Solvent (DES) was prepared by heating 1,3-dimethyl urea (0.975g, 11.11 mmol) + L-tartaric acid (0.555g, 3.7 mmol) at 80°C for 30 min. To this melt, 5-chloro-2-aminobenzophenone (0.231g, 1 mmol) and β-diketone/ketone/piperidone (1 mmol) was added and heating continued for another 30 minutes at 80°C to give the Friedländer annulation product (*in situ*). To the same pot aldehyde (1 mmol) was added and heating continued till the formation of

desired 2-styrylquinoline derivatives (monitoring by TLC). The reaction mixture was cooled to room temperature. Water was added to it and extracted by EtOAc (10X3 mL). The organic layers were separated and dried using sodium sulfate. Solvent was evaporated under vacuum. The crude product obtained was purified by silica gel column chromatography. Elution of the column using petroleum ether-ethyl acetate gave the pure product.

## 2. Confirmation of the reported molecules by reported melting points:

| S. No. | Compound No. | M.P °C (Found) | M.P °C (Reported) <sup>5-6</sup> |
|--------|--------------|----------------|----------------------------------|
| 1      | <b>5a</b>    | 206-207        | 207-208                          |
| 2      | <b>5e</b>    | 200-201        | 199-200                          |
| 3      | <b>5f</b>    | 204-205        | 205-206                          |
| 4      | <b>5g</b>    | 142-143        | 143-145                          |
| 5      | <b>5j</b>    | 146-147        | 147-148                          |
| 6      | <b>5k</b>    | 171-172        | 170-171                          |
| 7      | <b>5n</b>    | 164-165        | 163-164                          |
| 8      | <b>5o</b>    | 161-162        | 160-161                          |
| 9      | <b>5q</b>    | 148-150        | 149-152                          |

## References:

1. A. D. Becke, *J. Chem. Phys.* 1993, **98**, 5648–5652.
2. C. Lee, W. Yang, R. G. Parr, *Phys. Rev. B.* 1988, **37**, 785–789
3. S. Grimme, S. Ehrlich, L. Goerigk, *J. Comp. Chem.* 2011, **32**, 1456–65.
4. S. F. Boys, F. Bernardi, *Mol. Phys.* 1970, 19, 553.
5. D. Kumar, A. Kumar, M. M. Qadri, Md. I. Ansari, A. Gautam, A. K. Chakraborti, *RSC Adv.*, 2015, **5**, 2920–2927.
6. P. Sarma, S. Saikia, R. Borah, *Synth. Commun.*, 2016, **46**, 1187–1196.

## 3. Characterizations of new compounds

**Methyl-6-chloro-2-methyl-4-phenylquinoline-3-carboxylate (3a):** (*E*)-Methyl 6-chloro-4-phenyl-2-styrylquinoline-3-carboxylate (**5a**): White solid, mp 206-207 °C, 88% yield. <sup>1</sup>H NMR (400 MHz, CDCl<sub>3</sub>) δ 8.11 (d, *J* = 2.0 Hz, 1H), 8.08 (d, *J* = 4.8 Hz, 1H), 7.67 (dd, *J* = 9.0, 2.4 Hz, 1H), 7.62 (d, *J* = 7.2 Hz, 2H), 7.53–7.49 (m, 4H), 7.41 – 7.33 (m, 5H), 7.25 (d, *J* = 16.0 Hz, 1H), 3.60 (s, 3H).

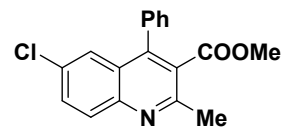

**Ethyl-6-chloro-2-methyl-4-phenylquinoline-3-carboxylate (3b):** White solid, mp 175–176 °C, 90% yield. <sup>1</sup>H NMR (400 MHz, CDCl<sub>3</sub>) δ 7.94 (d, *J* = 7.2 Hz, 1H), 7.57 (d, *J* = 6.0 Hz, 1H), 7.45–7.42 (m, 4H), 7.27–7.19 (m, 2H), 3.98 (s, 2H), 2.70 (s, 3H), 0.88 (s, 3H); IR (KBr, thin film, cm<sup>-1</sup>): ν<sub>max</sub> 3085, 2976, 1730, 1580, 1487, 1232, 842.

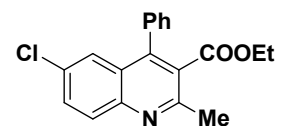

**6-Chloro-2,3-dimethyl-4-phenylquinoline (3c):** White solid, mp 210–211 °C, 90% yield. <sup>1</sup>H NMR (400 MHz, CDCl<sub>3</sub>) δ 7.97 (d, *J* = 8.4 Hz, 1H), 7.53–7.48 (m, 4H), 7.26–7.20 (m, 3H), 2.74 (s, 3H), 2.17 (s, 3H); HRMS (ESI, *m/z*): Calcd. For C<sub>17</sub>H<sub>14</sub>ClN<sup>+</sup> 268.0888, found 268.0879.

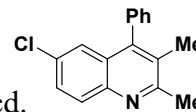

**Tert-butyl-8-chloro-10-phenyl-3,4-dihydrobenzo[b][1,6]naphthyridine-2(1H)-carboxylate (3f):** White solid, mp 178–179 °C, 90% yield. <sup>1</sup>H NMR (500 MHz, CDCl<sub>3</sub>) δ 7.98 (d, *J* = 8.9 Hz, 1H), 7.66–7.45 (m, 4H), 7.35 (s, 1H), 7.26–7.23 (m, 2H), 4.43 (s, 2H), 3.82 (t, *J* = 5.5 Hz, 2H), 3.25 (s, 2H), 1.44 (s, 9H); HRMS (ESI, *m/z*): Calcd. For C<sub>23</sub>H<sub>23</sub>ClN<sub>2</sub>O<sub>2</sub>H<sup>+</sup> 395.1531, found 395.1520.

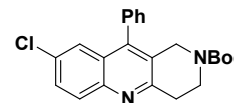

**(E)-Methyl 6-chloro-4-phenyl-2-styrylquinoline-3-carboxylate (5a):** White solid, mp 206–207 °C, 88% yield. <sup>1</sup>H NMR (400 MHz, CDCl<sub>3</sub>) δ 8.11 (d, *J* = 2.0 Hz, 1H), 8.08 (d, *J* = 4.8 Hz, 1H), 7.67 (dd, *J* = 9.0, 2.4 Hz, 1H), 7.62 (d, *J* = 7.2 Hz, 2H), 7.53–7.49 (m, 4H), 7.41–7.33 (m, 5H), 7.25 (d, *J* = 16.0 Hz, 1H), 3.60 (s, 3H).

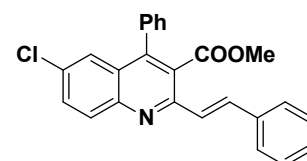

**Methyl-6-chloro-2-(3-nitrostyryl)-4-phenylquinoline-3-carboxylate (5b):** White solid, mp 210–211 °C, 95% yield. <sup>1</sup>H NMR (400 MHz, CDCl<sub>3</sub>) δ 8.25 (d, *J* = 8.8 Hz, 2H), 8.16–8.103 (m, 2H), 7.75 (d, *J* = 8.8 Hz, 2H), 7.72–7.69 (m, 1H), 7.57 (d, *J* = 2.4 Hz, 1H), 7.54–7.50 (m, 3H), 7.43 (d, *J* = 15.6 Hz, 1H), 7.37–7.35 (m, 2H), 3.60 (s, 3H); <sup>13</sup>C NMR (100 MHz, CDCl<sub>3</sub>) δ 168.4, 150.2, 147.6, 146.6, 146.5, 142.8, 134.9, 134.2, 133.3, 131.9, 131.3, 130.5, 129.1, 129.0, 128.9, 128.6, 128.5, 128.1, 127.6, 126.7, 125.4, 125.3, 124.1, 52.6; HRMS (ESI, *m/z*): Calcd. For C<sub>25</sub>H<sub>17</sub>ClN<sub>2</sub>O<sub>4</sub>H<sup>+</sup> 445.0950, found 445.0928; IR (KBr, thin film, cm<sup>-1</sup>): ν<sub>max</sub> 3042, 2958, 1718, 1564, 1527, 1227, 835.

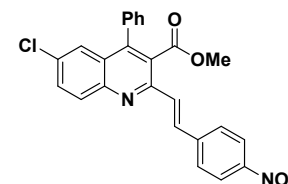

**Methyl-6-chloro-2-(4-methoxystyryl)-4-phenylquinoline-3-carboxylate (5c):** White solid, mp 169–170 °C, 85% yield. <sup>1</sup>H NMR (500 MHz, CDCl<sub>3</sub>) δ 8.08–8.03 (m, 2H), 7.65 (dd, *J* = 7.2, 2.0 Hz, 1H), 7.57 (d, *J* = 7.2 Hz, 2H), 7.52–7.50 (m, 4H), 7.36 (dd, *J* = 6.0, 1.6 Hz, 2H), 7.13 (d, *J* = 14.5 Hz, 1H), 6.92 (d, *J* = 6.8 Hz, 2H), 3.84 (s, 3H), 3.60 (s, 3H); <sup>13</sup>C NMR (125 MHz, CDCl<sub>3</sub>) δ 168.6, 160.4, 151.6, 146.6, 145.9, 136.6, 135.1, 132.3, 131.4, 131.1, 131.0, 129.2, 129.1, 128.8, 128.5, 127.4, 126.2, 125.2, 121.6, 114.2, 55.3, 52.4; HRMS (ESI, *m/z*): Calcd. For C<sub>26</sub>H<sub>20</sub>ClNO<sub>3</sub>H<sup>+</sup> 430.1132, found 430.1177; IR (KBr, thin film, cm<sup>-1</sup>): ν<sub>max</sub> 3065, 2974, 1736, 1603, 1256, 1207, 1028, 829.

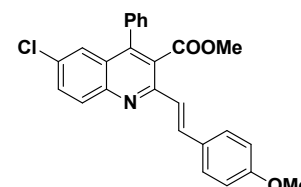

**Methyl-6-chloro-2-(4-methylstyryl)-4-phenylquinoline-3-carboxylate (5d):** White solid, mp 162–163 °C, 90% yield. <sup>1</sup>H NMR (500 MHz, CDCl<sub>3</sub>) δ 8.02 (s, 1H), 8.00 (s, 1H), 7.66 (d, *J* = 2.0 Hz, 1H), 7.66 (d, *J* = 2.0 Hz, 1H), 7.55–7.53 (m, 2H), 7.52–7.49 (m, 5H), 7.34–7.32 (m, 3H), 3.59 (s, 3H), 2.77 (s, 3H); <sup>13</sup>C NMR

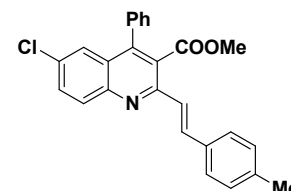

(125 MHz, CDCl<sub>3</sub>)  $\delta$  168.6, 154.9, 146.1, 145.6, 135.6, 134.9, 134.2, 132.4, 131.6, 131.2, 131.1, 130.5, 129.1, 128.9, 128.8, 128.5, 128.0, 125.9, 125.2, 124.4, 52.3, 23.7; HRMS (ESI, m/z): Calcd. For C<sub>26</sub>H<sub>20</sub>ClNO<sub>2</sub>H<sup>+</sup> 414.1255, found 414.0342; IR (KBr, thin film, cm<sup>-1</sup>):  $\nu_{\max}$  3080, 2986, 1729, 1633, 1215, 1177, 820.

**Ethyl-6-chloro-2-(4-methylstyryl)-4-phenylquinoline-3-carboxylate (5h):** White solid, mp 162–163 °C, 85% yield. <sup>1</sup>H NMR (400 MHz, CDCl<sub>3</sub>)  $\delta$  8.09 (d,  $J$  = 3.2 Hz, 1H), 8.06 (d,  $J$  = 9.6 Hz, 1H), 7.66 (dd,  $J$  = 6.4, 2.4 Hz, 1H), 7.52–7.50 (m, 6H), 7.38–7.36 (m, 2H), 7.25 (d,  $J$  = 3.2 Hz, 1H), 7.19 (d,  $J$  = 7.6 Hz, 2H), 4.10 (q,  $J$  = 14.0, 6.8 Hz, 2H), 2.38 (s, 3H), 0.96 (t,  $J$  = 7.2 Hz, 3H); <sup>13</sup>C NMR (100 MHz, CDCl<sub>3</sub>)  $\delta$  168.0, 151.5, 146.5, 145.8, 139.1, 136.97, 135.1, 133.7, 132.4, 131.4, 131.1, 129.5, 129.4, 128.8, 128.6, 128.4, 127.6, 126.3, 125.2, 122.9, 61.6, 21.4, 13.7; HRMS (ESI, m/z): Calcd. For C<sub>27</sub>H<sub>22</sub>ClNO<sub>2</sub>H<sup>+</sup> 428.1412, found 428.1407; IR (KBr, thin film, cm<sup>-1</sup>):  $\nu_{\max}$  3050, 2952, 1724, 1621, 1214, 1156, 832.

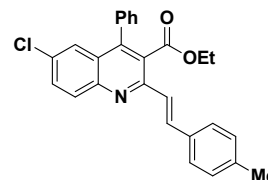

**Ethyl-6-chloro-2-(2-methoxystyryl)-4-phenylquinoline-3-carboxylate (5i):** Pale yellow solid, mp 164–165 °C, 86% yield. <sup>1</sup>H NMR (400 MHz, CDCl<sub>3</sub>)  $\delta$  8.08–8.07 (m, 2H), 7.65 (d,  $J$  = 8.8 Hz, 1H), 7.56 (d,  $J$  = 8.4 Hz, 2H), 7.50 (s, 4H), 7.38–7.36 (m, 2H), 7.18 (d,  $J$  = 15.6 Hz, 1H), 6.92 (d,  $J$  = 8.4 Hz, 2H), 4.10 (q,  $J$  = 13.8, 6.8 Hz, 2H), 3.84 (s, 3H), 0.96 (t,  $J$  = 7.2 Hz, 3H); <sup>13</sup>C NMR (100 MHz, CDCl<sub>3</sub>):  $\delta$  168.1, 160.3, 151.6, 146.5, 145.8, 136.5, 135.1, 132.2, 131.3, 131.0, 129.4, 129.3, 129.1, 128.7, 128.4, 127.6, 126.2, 125.2, 121.6, 114.2, 61.6, 55.3, 13.7; HRMS (ESI, thin film, m/z): Calcd. For C<sub>27</sub>H<sub>22</sub>ClNO<sub>3</sub>H<sup>+</sup> 444.1361, found 444.1371.

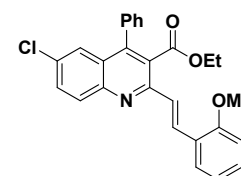

**Ethyl-2-(4-bromostyryl)-6-chloro-4-phenylquinoline-3-carboxylate (5l):** White solid, mp 189–190 °C, 90% yield. <sup>1</sup>H NMR (400 MHz, CDCl<sub>3</sub>)  $\delta$  8.45 (s, 1H), 8.19–8.10 (m, 3H), 7.92 (d,  $J$  = 7.6 Hz, 1H), 7.70 (d,  $J$  = 9.2 Hz, 1H), 7.59–7.57 (m, 5H), 7.44 (d,  $J$  = 15.6 Hz, 1H), 7.38 (d,  $J$  = 3.2 Hz, 2H), 4.12 (q,  $J$  = 13.8, 6.8 Hz, 2H), 0.95 (t,  $J$  = 7.2 Hz, 3H); <sup>13</sup>C NMR (100 MHz, CDCl<sub>3</sub>+DMSO-d<sub>6</sub>)  $\delta$  169.4, 156.3, 147.4, 141.2, 139.1, 135.8, 134.3, 133.8, 133.0, 132.8, 132.2, 131.7, 130.7, 130.0, 128.6, 127.1, 125.7, 124.3, 121.3, 117.4, 60.3, 15.1; HRMS (ESI, m/z): Calcd. For C<sub>26</sub>H<sub>19</sub>BrClNO<sub>2</sub>H<sub>2</sub><sup>+</sup> 493.0433, found 493.9371; IR (KBr, thin film, cm<sup>-1</sup>):  $\nu_{\max}$  3025, 2980, 1717, 1564, 1073, 835, 678.

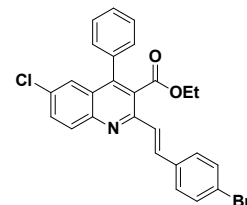

**Ethyl-6-chloro-2-(3-nitrostyryl)-4-phenylquinoline-3-carboxylate (5m):** White solid, mp 176–177 °C, 95% yield. <sup>1</sup>H NMR (400 MHz, CDCl<sub>3</sub>)  $\delta$  8.47 (s, 1H), 8.20–8.12 (m, 3H), 7.94 (d,  $J$  = 7.6 Hz, 1H), 7.72 (m, 1H), 7.60–7.54 (m, 5H), 7.48–7.39 (m, 3H), 7.28 (s, 1H), 4.14 (q,  $J$  = 6.8 Hz, 2H), 0.98 (t,  $J$  = 6.8 Hz, 3H). <sup>13</sup>C NMR (125 MHz, CDCl<sub>3</sub>)  $\delta$  167.8, 150.3, 148.7, 146.4, 146.3, 138.2, 135.0, 134.2, 133.2, 133.1, 131.7, 131.2, 129.7, 129.3, 128.9, 128.5, 127.7,

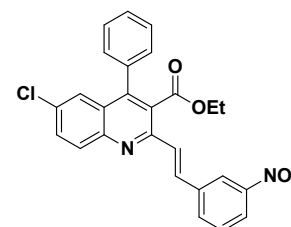

126.9, 126.7, 125.3, 123.2, 122.0, 61.9, 13.6; HRMS (ESI, m/z): Calcd. For  $C_{26}H_{19}ClN_2O_4H^+$  459.1106, found 459.0182; IR (KBr, thin film,  $cm^{-1}$ ):  $\nu_{max}$  2990, 1737, 1604, 1540, 1350, 1256, 829.

**Ethyl-6-chloro-2-(2-(furan-2-yl)vinyl)-4-phenylquinoline-3-carboxylate (5p):** White solid, mp 160–161 °C, 85% yield.  $^1H$  NMR (500 MHz,  $CDCl_3$ )  $\delta$  8.04 (d,  $J = 9.0$  Hz, 1H), 7.90 (d,  $J = 15.5$  Hz, 1H), 7.65 (dd,  $J = 9.0, 2.0$  Hz, 1H), 7.53–7.49 (m, 4H), 7.46 (d,  $J = 1.5$  Hz, 1H), 7.38–7.37 (m, 1H), 7.36 (d,  $J = 2.0$  Hz, 1H), 7.20 (d,  $J = 15.3$  Hz, 1H), 6.58 (d,  $J = 3.0$  Hz, 1H), 6.47 (dd,  $J = 3.0, 1.5$  Hz, 1H), 4.12 (q,  $J = 18.0, 7.5$  Hz, 2H), 0.97 (t,  $J = 7.0$  Hz, 3H);  $^{13}C$  NMR (125 MHz,  $CDCl_3$ )  $\delta$  168.6, 154.9, 146.1, 145.6, 135.6, 134.9, 133.0, 132.4, 131.6, 131.2, 131.1, 130.5, 129.0, 128.9, 128.8, 128.5, 128.0, 125.9, 125.28, 124.44, 52.31, 13.67; HRMS (ESI, m/z): Calcd. For  $C_{24}H_{18}ClNO_3H^+$  404.1048, found 404.1056. IR (KBr, thin film,  $cm^{-1}$ ):  $\nu_{max}$  3012, 2982, 1732, 1610, 1542, 1217, 829.

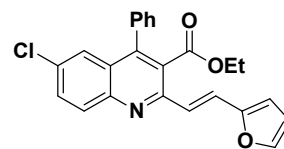

**(E)-Ethyl-4-phenyl-2-styrylquinoline-3-carboxylate (5q):** White solid, mp 186–187 °C, 85% yield.  $^1H$  NMR (400 MHz,  $CDCl_3$ )  $\delta$  8.09 (d,  $J = 8.4$  Hz, 1H), 8.02 (d,  $J = 15.6$  Hz, 1H), 7.66–7.62 (m, 1H), 7.55 (d,  $J = 7.6$  Hz, 2H), 7.48 (d,  $J = 8.4$  Hz, 1H), 7.41–7.39 (m, 3H), 7.35–7.23 (m, 7H), 4.02 (q,  $J = 7.2$  Hz, 2H), 0.88 (t,  $J = 7.2$  Hz, 3H); IR (KBr, thin film,  $cm^{-1}$ ):  $\nu_{max}$  3075, 2976, 1740, 1615, 1520, 1460, 1055.

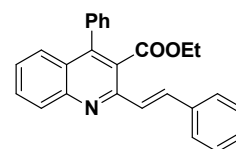

**(E)-Ethyl-2-(4-chlorostyryl)-6-nitro-4-phenylquinoline-3-carboxylate (5r):** yellow solid, mp 170–171 °C, 86% yield.  $^1H$  NMR (400 MHz,  $CDCl_3$ )  $\delta$  8.01–7.92 (m, 2H), 7.58 (d,  $J = 8.0$  Hz, 1H), 7.42 (s, 8H), 7.29–7.17 (m, 3H), 4.01 (d,  $J = 6.4$  Hz, 2H), 0.86 (s, 3H);  $^{13}C$  NMR (100 MHz,  $CDCl_3$ )  $\delta$  168.94, 152.02, 147.51, 147.11, 136.61, 136.42, 136.10, 133.75, 132.94, 132.54, 132.15, 130.36, 130.06, 129.85, 129.51, 128.64, 127.52, 126.27, 125.63, 123.89, 62.73, 14.66; HRMS (ESI, m/z): Calcd. For  $C_{26}H_{19}ClN_2O_4H^+$  459.1106, found 459.1107; IR (KBr, thin film,  $cm^{-1}$ ):  $\nu_{max}$  3083, 2986, 1736, 1620, 1545, 1452, 1063, 862.

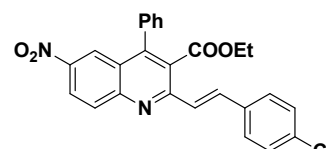

**6-Chloro-3-methyl-2-(4-methylstyryl)-4-phenylquinoline (6a):** White solid, mp 191–192 °C, 85% yield.  $^1H$  NMR (500 MHz,  $CDCl_3$ )  $\delta$  8.04 (d,  $J = 9.0$  Hz, 1H), 8.00 (d,  $J = 15.5$  Hz, 1H), 7.57–7.52 (m, 5H), 7.50–7.47 (m, 2H), 7.26–7.24 (m, 3H), 2.38 (s, 3H), 2.31 (s, 3H);  $^{13}C$  NMR (125 MHz,  $CDCl_3$ )  $\delta$  155.4, 146.2, 144.9, 138.7, 137.0, 136.3, 134.2, 131.4, 130.8, 129.5, 129.3, 129.1, 128.8, 128.0, 127.9, 127.8, 127.4, 124.9, 123.6, 21.4, 16.8; HRMS (ESI, m/z): Calcd. For  $C_{25}H_{20}ClNH^+$  370.1357, found 370.1372; IR (KBr, thin film,  $cm^{-1}$ ):  $\nu_{max}$  3014, 2985, 2919, 1631, 1572, 1163, 805.

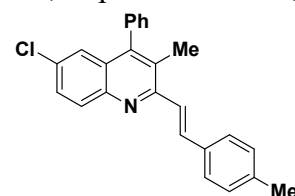

**6-Chloro-2-(4-methoxystyryl)-3-methyl-4-phenylquinoline (6b):** Yellow solid, mp 174–175 °C, 88% yield. <sup>1</sup>H NMR (400 MHz, CDCl<sub>3</sub>) δ 8.03–7.96 (m, 2H), 7.62–7.49 (m, 6H), 7.43 (d, *J* = 15.6 Hz, 1H), 7.24 (d, *J* = 7.6 Hz, 3H), 6.93 (d, *J* = 8.0 Hz, 2H), 3.85 (s, 3H), 2.31 (s, 3H); <sup>13</sup>C NMR (100 MHz, CDCl<sub>3</sub>) δ 160.1, 155.5, 146.2, 144.9, 137.1, 135.9, 131.3, 130.7, 129.7, 129.3, 129.3, 128.9, 128.7, 128.1, 127.8, 127.7, 127.7, 124.9, 122.3, 114.2, 55.3, 16.8; HRMS (ESI, *m/z*): Calcd. For C<sub>25</sub>H<sub>20</sub>ClNOH<sup>+</sup> 386.1306, found 386.1321; IR (KBr, thin film, cm<sup>-1</sup>): ν<sub>max</sub> 2924, 3010, 1627, 1603, 1443, 1171, 831.

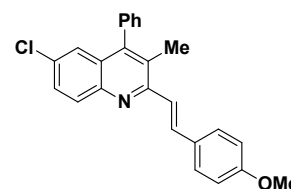

**6-Chloro-2-(4-chlorostyryl)-3-methyl-4-phenylquinoline (6c):** Pale yellow solid, mp 165–166 °C, 92% yield. <sup>1</sup>H NMR (500 MHz, CDCl<sub>3</sub>) δ 8.04 (d, *J* = 9.0 Hz, 1H), 7.97 (d, *J* = 15.5 Hz, 1H), 7.85 (s, 1H), 7.60–7.48 (m, 5H), 7.37–7.32 (m, 3H), 7.27 (s, 1H), 7.24 (d, *J* = 7.0 Hz, 1H), 7.06 (d, *J* = 2.0 Hz, 1H), 2.32 (s, 3H); <sup>13</sup>C NMR (125 MHz, CDCl<sub>3</sub>) δ 160.0, 154.7, 146.3, 145.2, 144.8, 143.6, 136.8, 135.3, 134.8, 134.1, 130.8, 130.3, 129.2, 128.9, 128.7, 128.4, 127.8, 125.1, 124.8, 16.7; HRMS (ESI, *m/z*): Calcd. For C<sub>24</sub>H<sub>17</sub>Cl<sub>2</sub>NH<sup>+</sup> 390.0811, found 389.9901; IR (KBr, thin film, cm<sup>-1</sup>): ν<sub>max</sub> 3064, 2910, 1571, 1420, 721, 702.

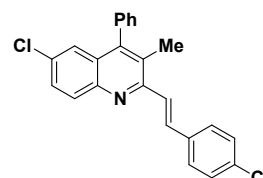

**6-Chloro-3-methyl-2-(4-nitrostyryl)-4-phenylquinoline (6d):** Yellow solid, mp 219–220 °C, 95% yield. <sup>1</sup>H NMR (500 MHz, CDCl<sub>3</sub>) δ 8.38 (d, *J* = 15.0 Hz, 1H), 8.05 (d, *J* = 9.0 Hz, 1H), 8.01 (d, *J* = 8.0 Hz, 1H), 7.83 (d, *J* = 8.0 Hz, 1H), 7.64 (t, *J* = 7.5 Hz, 1H), 7.51–7.45 (m, 6H), 7.27–7.23 (m, 3H), 2.32 (s, 3H); <sup>13</sup>C NMR (125 MHz, CDCl<sub>3</sub>+ DMSO-d<sub>6</sub>) δ 154.2, 148.6, 146.6, 144.9, 136.8, 133.1, 132.8, 132.1, 131.4, 131.2, 129.8, 129.6, 129.3, 128.9, 128.8, 128.2, 127.9, 124.8, 124.8, 16.8; HRMS (ESI, *m/z*): Calcd. For C<sub>24</sub>H<sub>17</sub>ClN<sub>2</sub>O<sub>2</sub>H<sup>+</sup> 401.1051, found 401.1065; IR (KBr, thin film, cm<sup>-1</sup>): ν<sub>max</sub> 3010, 298, 1567, 1511, 1337, 1166, 824.

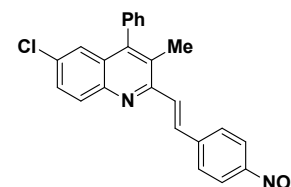

**5-(2-(6-Chloro-3-methyl-4-phenylquinolin-2-yl)-vinyl)-2-ethoxyphenol (6e):** White solid, mp 152–153 °C, 85% yield. <sup>1</sup>H NMR (500 MHz, CDCl<sub>3</sub>) δ 8.03 (d, *J* = 9.0 Hz, 1H), 7.95 (d, *J* = 16.5 Hz, 1H), 7.54–7.49 (m, 5H), 7.40–7.36 (m, 2H), 7.25–7.21 (m, 3H), 7.14 (s, 1H), 4.19 (q, *J* = 14.0, 7.0 Hz, 2H), 2.31 (s, 3H), 1.47 (t, *J* = 7.0 Hz, 3H); <sup>13</sup>C NMR (125 MHz, CDCl<sub>3</sub>+ DMSO-d<sub>6</sub>) δ 167.6, 149.8, 147.9, 144.1, 141.7, 140.4, 139.8, 139.7, 138.7, 137.7, 136.6, 136.2, 136.0, 135.8, 134.8, 134.0, 130.9, 129.4, 127.9, 127.1, 115.6, 61.0, 17.8, 13.5; HRMS (ESI, *m/z*): Calcd. For C<sub>26</sub>H<sub>22</sub>ClNO<sub>2</sub>H<sup>+</sup> 416.1412, found 416.1404.

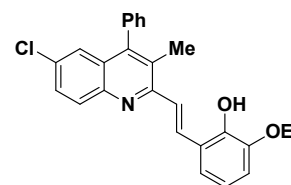

**6-Chloro-2-(3,4-dimethoxystyryl)-3-methyl-4-phenylquinoline (6f):** White solid, mp 175–176 °C, 90% yield. <sup>1</sup>H NMR (400 MHz, CDCl<sub>3</sub>) δ 8.15–8.05 (m, 2H), 7.59–7.53 (m, 4H), 7.43 (d, *J* = 15.6 Hz, 1H), 7.30–7.28 (m, 4H), 7.23 (s, 1H), 6.93 (d, *J* = 8.4 Hz, 1H), 3.99 (s, 3H), 3.95 (s, 3H), 2.36 (s, 3H); <sup>13</sup>C NMR (125 MHz, CDCl<sub>3</sub>) δ 160.5, 155.4, 149.8, 149.1, 146.2, 144.9, 137.0,

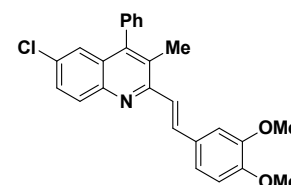

136.5, 136.3, 131.3, 130.7, 129.3, 128.8, 128.8, 128.1, 127.8, 127.7, 127.3, 124.9, 122.6, 121.0, 119.4, 111.2, 110.0, 56.0, 16.8; HRMS (ESI, m/z): Calcd. For  $C_{26}H_{22}ClNO_2H^+$  416.1412, found 416.1404; IR (KBr, thin film,  $cm^{-1}$ ):  $\nu_{max}$  3029, 2954, 1568, 1261, 1245, 1027, 828.

**3-(2-(6-Chloro-3-methyl-4-phenylquinolin-2-yl)-vinyl)-2-hydroxy-4H-chromen-4-one (6g):**

Dark red solid, 86% yield.  $^1H$  NMR (400 MHz,  $CDCl_3$ )  $\delta$  8.00 (d,  $J$  = 9.2 Hz, 1H), 7.93 (d,  $J$  = 15.6 Hz, 1H), 7.58–7.42 (m, 5H), 7.40–7.24 (m, 3H), 7.2–7.13 (m, 3H), 7.03 (d,  $J$  = 6.0 Hz, 1H), 2.26 (s, 3H);  $^{13}C$  NMR (100 MHz,  $CDCl_3+DMSO-d_6$ )  $\delta$  198.5, 172.0, 160.0, 152.7, 148.5, 141.4, 141.2, 133.6, 133.5, 132.5, 131.9, 131.7, 130.3, 129.7, 129.6, 129.4, 129.1, 129.0, 128.3, 127.7, 127.4, 124.7, 118.4, 85.6, 16.4; HRMS (ESI, m/z): Calcd. For  $C_{27}H_{18}ClNO_3H^+$  440.1048, found 440.1045; IR (KBr, thin film,  $cm^{-1}$ ):  $\nu_{max}$  3395, 3052, 2963, 1720, 1642, 1266, 1088, 748.

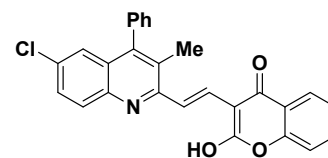

**2-(2-(1H-Indol-3-yl)vinyl)-6-chloro-3-methyl-4-phenylquinoline (6h):** White solid, mp 182–183 °C, 86% yield.  $^1H$  NMR (400 MHz,  $CDCl_3+DMSO-d_6$ )  $\delta$  7.95 (s, 1H), 7.89 (d,  $J$  = 10.4 Hz, 3H), 7.78 (d,  $J$  = 14.8 Hz, 1H), 7.71–7.64 (m, 5H), 7.42 (d,  $J$  = 6.4 Hz, 3H), 7.28 (d,  $J$  = 5.6 Hz, 2H), 2.29 (s, 3H);  $^{13}C$  NMR (100 MHz,  $CDCl_3+DMSO-d_6$ )  $\delta$  162.7, 145.3, 142.9, 140.8, 136.5, 136.3, 135.2, 133.9, 133.6, 132.0, 131.1, 130.2, 129.5, 129.1, 128.4, 127.4, 125.8, 124.6, 122.7, 120.7, 119.5, 113.5, 110.8, 17.7; HRMS (ESI, m/z): Calcd. For  $C_{26}H_{19}ClN_2H^+$  395.1310, found 395.1314; IR (KBr, thin film,  $cm^{-1}$ ):  $\nu_{max}$  3301, 3078, 2951, 1651, 1272, 1246, 1075, 742.

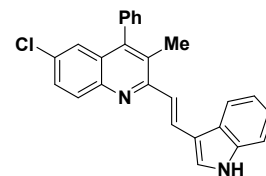

**7-Chloro-3-(4-methylbenzylidene)-9-phenyl-2,3-dihydro-1H-cyclopenta[b]quinoline (7a):**

Yellow solid, mp 229–230 °C, 89% yield.  $^1H$  NMR (500 MHz,  $CDCl_3$ )  $\delta$  8.06 (d,  $J$  = 9.0 Hz, 1H), 7.81 (s, 1H), 7.55–7.49 (m, 7H), 7.35 (d,  $J$  = 7.5 Hz, 2H), 7.24–7.20 (m, 2H), 3.15 (s, 2H), 3.0–2.98 (m, 2H), 2.38 (s, 3H);  $^{13}C$  NMR (125 MHz,  $CDCl_3$ )  $\delta$  162.2, 147.2, 142.7, 139.7, 137.6, 136.0, 135.9, 134.5, 131.4, 130.8, 129.5, 129.4, 129.3, 129.1, 128.8, 128.3, 127.8, 125.4, 124.4, 28.8, 27.7, 21.4; HRMS (ESI, m/z): Calcd. For  $C_{26}H_{20}ClNH^+$  382.1357, found 382.1353; IR (KBr, thin film,  $cm^{-1}$ ):  $\nu_{max}$  3030, 2917, 1600, 1585, 1163, 1075, 826.

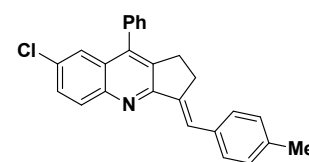

**7-Chloro-3-(4-methoxybenzylidene)-9-phenyl-2,3-dihydro-1H-cyclopenta[b]quinoline (7b):**

White solid, mp 168–169 °C, 85% yield.  $^1H$  NMR (400 MHz,  $CDCl_3$ )  $\delta$  8.06 (d,  $J$  = 8.8 Hz, 1H), 7.79 (s, 1H), 7.58–7.49 (m, 7H), 7.36 (d,  $J$  = 6.8 Hz, 2H), 6.96 (d,  $J$  = 8.4 Hz, 2H), 3.85 (s, 3H), 3.17–3.14 (m, 2H), 3.03–3.00 (m, 2H);  $^{13}C$  NMR (100 MHz,  $CDCl_3$ )  $\delta$  162.3, 159.1, 147.2, 142.6, 138.4, 136.0, 132.0, 131.2, 130.9, 130.7, 130.2, 129.4, 129.1, 128.8, 128.3, 127.8, 125.0, 124.3, 114.0, 55.3, 28.7, 27.7; HRMS (ESI, m/z):

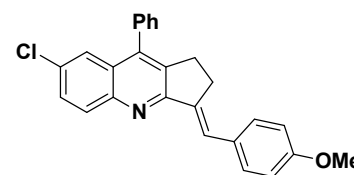

Calcd. For C<sub>26</sub>H<sub>20</sub>ClNOH<sup>+</sup> 398.1306, found 398.1312; IR (KBr, thin film, cm<sup>-1</sup>): ν<sub>max</sub> 2974, 2835, 1632, 1604, 1252, 1128, 1028, 830.

**4-((7-Chloro-9-phenyl-1H-cyclopenta[b]quinolin-3(2H)-ylidene)methyl)-N,N-dimethylaniline (7c):**

White solid, mp 218–219 °C, 85% yield. <sup>1</sup>H NMR (500 MHz, CDCl<sub>3</sub>) δ 8.14 (s, 1H), 8.03 (d, *J* = 9.0 Hz, 1H), 7.54–7.50 (m, 3H), 7.49–7.46 (m, 3H), 7.27–7.23 (m, 3H), 6.75 (d, *J* = 9.0 Hz, 2H), 3.01 (s, 6H), 2.63 (t, *J* = 5.5 Hz, 2H), 1.79 (t, *J* = 6.0 Hz, 2H); <sup>13</sup>C NMR (125MHz, CDCl<sub>3</sub>) δ 155.5, 149.5, 145.2, 144.8, 136.6, 132.3, 130.9, 130.6, 129.7, 129.3, 129.2, 128.7, 128.0, 127.4, 126.0, 124.5, 111.8, 40.3, 28.5, 28.5, 22.9; HRMS (ESI, m/z): Calcd. For C<sub>27</sub>H<sub>23</sub>ClN<sub>2</sub>H<sup>+</sup> 411.1623, found 411.162; IR (KBr, thin film, cm<sup>-1</sup>): ν<sub>max</sub> 3385, 3101, 2932, 1613, 1566, 1265, 1163, 822.

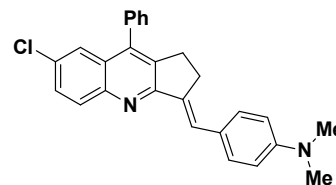

**6-Chloro-2-(furan-2-ylmethylene)-8-phenyl-1,2-dihydrocyclobuta[b]quinoline (7d):** Brown

solid, mp 198–199 °C, 88% yield. <sup>1</sup>H NMR (400 MHz, CDCl<sub>3</sub>) δ 8.02 (d, *J* = 8.8 Hz, 1H), 7.63 (t, *J* = 2.4 Hz, 1H), 7.57–7.447 (m, 6H), 7.36 (d, *J* = 6.8 Hz, 2H), 6.53–6.49 (m, 2H), 3.17–3.16 (m, 2H), 3.02–2.99 (m, 2H); <sup>13</sup>C NMR (100 MHz, CDCl<sub>3</sub>) δ 161.5, 153.8, 143.0, 142.7, 138.8, 136.8, 135.9, 131.4, 130.7, 129.4, 129.0, 128.8, 128.3, 127.8, 124.3, 112.7, 112.6, 112.0, 111.7, 28.4, 27.4; HRMS (ESI, m/z): Calcd.

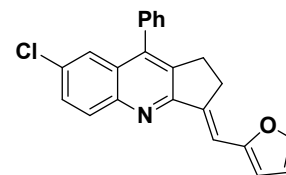

For C<sub>23</sub>H<sub>16</sub>ClNOH<sup>+</sup> 358.0993, found: 358.0990; IR (KBr, thin film, cm<sup>-1</sup>): ν<sub>max</sub> 3059, 2942, 2884, 1683, 1537, 1268, 1073, 829.

**7-Chloro-3-((E)-3-(4-methoxyphenyl)allylidene)-9-phenyl-2,3-dihydro-1H-cyclopenta**

**[b]quinoline (7e):** Yellow solid, mp 170–171 °C, 85% yield. <sup>1</sup>H NMR (400 MHz, CDCl<sub>3</sub>) δ 8.13–7.92 (m, 2H), 7.62 (d, *J* = 8.0 Hz, 2H), 7.58–7.39 (m, 5H), 7.25 (d, *J* = 7.6 Hz, 4H), 6.94 (d, *J* = 8.0 Hz, 2H), 3.75 (s, 3H), 2.95 (d, *J* = 7.3 Hz, 2H), 2.19 (t, *J* = 7.0 Hz, 2H); <sup>13</sup>C NMR (100 MHz, CDCl<sub>3</sub>) δ 171.22, 160.5, 145.6, 145.0,

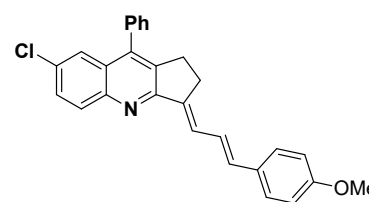

141.2, 134.3, 133.2, 132.6, 131.7, 129.5, 129.3, 129.1, 128.9, 128.6, 128.2, 127.6, 124.8, 124.7, 123.0, 114.3, 97.4, 55.3, 27.5, 26.5; HRMS (ESI, m/z): Calcd. For C<sub>28</sub>H<sub>22</sub>ClNOH<sup>+</sup> 424.1463, found 424.1467; IR (KBr, thin film, cm<sup>-1</sup>): ν<sub>max</sub> 3068, 2932, 1599, 1583, 1509, 1253, 1173, 818.

**7-Chloro-4-(4-methylbenzylidene)-9-phenyl-1, 2, 3, 4-tetrahydroacridine (7f):** White solid, mp

185–186 °C, 88% yield. <sup>1</sup>H NMR (500 MHz, CDCl<sub>3</sub>) δ 8.20 (s, 1H), 8.04 (d, *J* = 9.0 Hz, 1H), 7.55–7.47 (m, 5H), 7.41 (d, *J* = 8.0 Hz, 2H), 7.29 (d, *J* = 2.5 Hz, 1H), 7.25–7.20 (m, 3H), 2.97 (t, *J* = 5.5 Hz, 2H), 2.65 (t, *J* = 6.0 Hz, 3H), 2.38 (s, 3H), 1.81–1.76 (m, 2H); <sup>13</sup>C NMR (125 MHz, CDCl<sub>3</sub>) δ 154.7, 145.3, 145.1, 137.0, 136.5, 135.4, 134.9, 131.4, 131.0, 130.0, 129.9, 129.8, 129.4, 129.2, 128.9, 128.8, 128.1, 127.6, 124.5, 28.6, 28.2, 22.9, 21.3; HRMS

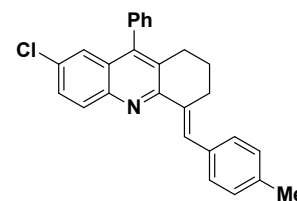



(ESI, m/z): Calcd. For  $C_{27}H_{22}ClNH^+$  396.1518, found 396.1514; IR (KBr, thin film,  $cm^{-1}$ ):  $\nu_{max}$  3102, 2958, 2863, 1602, 1540, 1169, 820.

**7-Chloro-4-(4-methoxybenzylidene)-9-phenyl-1,2,3,4-tetrahydroacridine (7g):** White solid, mp 174–175 °C, 85% yield.  $^1H$  NMR (500 MHz,  $CDCl_3$ )  $\delta$  8.17 (s, 1H), 8.03 (d,  $J = 9.0$  Hz, 1H), 7.54–7.46 (m, 7H), 7.28–7.24 (m, 2H), 6.94 (d,  $J = 8.0$  Hz, 2H), 3.84 (s, 3H), 2.96 (t,  $J = 5.5$  Hz, 2H), 2.64 (t,  $J = 6.0$  Hz, 2H), 1.80 (p,  $J = 6.0, 5.5$  Hz, 2H);  $^{13}C$  NMR (125 MHz,  $CDCl_3$ )  $\delta$  162.3, 159.1, 158.6, 147.2, 142.6, 138.4, 136.0, 135.9, 131.2, 130.9, 130.7, 130.2, 129.4, 129.1, 128.8, 128.3, 127.8, 125.0, 124.3, 114.0, 55.3, 28.7, 27.7; HRMS (ESI, m/z):

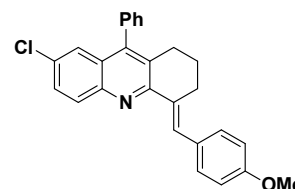

Calcd. For  $C_{27}H_{22}ClNOH^+$  412.1463, found 412.1467; IR (KBr, thin film,  $cm^{-1}$ ):  $\nu_{max}$  3069, 2948, 1602, 1536, 1167, 1031, 832.

**7-Chloro-4-(4-chlorobenzylidene)-9-phenyl-1,2,3,4-tetrahydroacridine (7h):** White solid, mp 221–222 °C, 90% yield.  $^1H$  NMR (500 MHz,  $CDCl_3$ )  $\delta$  8.17 (s, 1H), 8.03 (d,  $J = 9.0$  Hz, 1H), 7.55–7.52 (m, 3H), 7.51–7.47 (m, 2H), 7.36 (d,  $J = 8.0$  Hz, 2H), 7.30 (d,  $J = 2.0$  Hz, 1H), 7.25–7.23 (m, 2H), 2.93 (t,  $J = 7.0$  Hz, 2H), 2.66 (t,  $J = 6.5$  Hz, 2H), 1.82–1.77 (m, 2H);  $^{13}C$  NMR (125 MHz,  $CDCl_3$ )  $\delta$  154.2, 145.5, 145.1, 136.7, 136.4, 136.2, 132.8, 131.6, 131.1, 129.8, 129.5, 129.2, 129.0, 128.8, 128.6, 128.4, 128.1, 127.7, 124.6, 28.5, 28.1, 22.9; HRMS (ESI, m/z): Calcd. For  $C_{26}H_{19}Cl_2NH^+$  416.0967, found 416.0968; IR (KBr, thin film,  $cm^{-1}$ ):  $\nu_{max}$  3080, 2940, 1565, 1474, 829, 820.

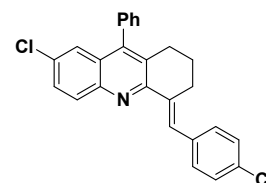

**4-(4-Bromobenzylidene)-7-chloro-9-phenyl-1,2,3,4-tetrahydroacridine (7i):** White solid, mp 237–238 °C, 92% yield.  $^1H$  NMR (500 MHz,  $CDCl_3$ )  $\delta$  8.16 (s, 1H), 8.02 (d,  $J = 9.0$  Hz, 1H), 7.54–7.46 (m, 4H), 7.42–7.33 (m, 4H), 7.28 (d,  $J = 2.0$  Hz, 1H), 7.24–7.21 (m, 2H), 2.92–2.90 (m, 2H), 2.64 (t,  $J = 6.5$  Hz, 2H), 1.81–1.76 (m, 2H);  $^{13}C$  NMR (125 MHz,  $CDCl_3$ )  $\delta$  155.2, 149.0, 146.1, 139.3, 137.7, 137.2, 133.8, 132.6, 132.1, 131.3, 130.5, 130.2, 129.8, 129.6, 129.4, 129.1, 128.7, 128.0, 125.6, 29.5, 29.1, 23.9; HRMS (ESI, m/z): Calcd. For  $C_{26}H_{19}BrClNH_2^{+2}$  461.0535, found 461.9387; IR (KBr, thin film,  $cm^{-1}$ ):  $\nu_{max}$  3051, 2938, 1620, 1566, 1071, 830, 708.

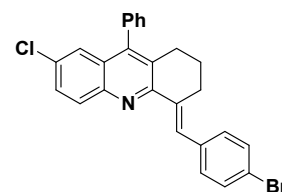

**3-((7-Chloro-9-phenyl-2,3-dihydroacridin-4(1H)-ylidene)methyl)-2-hydroxy-4H-chromen-4-one (7j):** Yellow solid, mp 205–206 °C, 85% yield.  $^1H$  NMR (400 MHz,  $CDCl_3$ )  $\delta$  8.24 (s, 1H), 8.19 (d,  $J = 8.8$  Hz, 2H), 7.58 (d,  $J = 8.4$  Hz, 2H), 7.52–7.44 (m, 4H), 7.26 (d,  $J = 1.6$  Hz, 1H), 7.18 (d,  $J = 6.8$  Hz, 3H), 2.89 (t,  $J = 5.2$  Hz, 2H), 2.63 (t,  $J = 6.0$  Hz, 2H), 1.80–1.74 (m, 2H);  $^{13}C$  NMR (100 MHz,  $CDCl_3$ )  $\delta$  183.4, 172.6, 137.2, 136.3, 135.4, 134.2, 133.9, 133.7, 132.6, 132.3, 132.0, 131.8, 129.9, 129.3, 129.0, 128.9, 128.5, 128.5, 128.6, 127.1, 126.1,

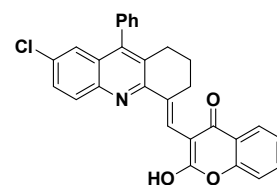

125.8, 122.8, 120.4, 26.6, 22.7, 22.8; HRMS (ESI, m/z): Calcd. For C<sub>29</sub>H<sub>20</sub>ClNO<sub>3</sub> 465.1132, found 463.9975 (M-1); IR (KBr, thin film, cm<sup>-1</sup>): ν<sub>max</sub> 3420, 3050, 2931, 1651, 1291, 1271, 703.

***Tert-butyl-8-chloro-4-(4-methylbenzylidene)-10-phenyl-3,4-dihydrobenzo[b][1,6] naphthyridin-2(1H)-carboxylate (8a)***: Pale yellow solid, mp 155–156 °C, 88% yield. <sup>1</sup>H

NMR (400 MHz, CDCl<sub>3</sub>) δ 8.10 (s, 1H), 8.02 (d, *J* = 8.8 Hz, 1H), 7.53 – 7.43 (m, 4H), 7.31 – 7.28 (m, 3H), 7.22 – 7.14 (m, 4H), 4.70 (s, 2H), 4.39 (s, 2H), 2.31 (s, 3H), 1.21 (s, 9H); <sup>13</sup>C NMR (100 MHz, CDCl<sub>3</sub>) δ 154.6, 145.6, 145.0, 139.3, 137.8, 134.9, 133.6, 132.0, 131.9, 131.0, 130.1, 129.7, 129.1, 128.7, 128.7, 128.6, 128.3, 127.3, 126.0, 124.6, 80.2, 53.8, 44.5, 28.3, 21.3; HRMS (ESI, m/z): Calcd. For C<sub>31</sub>H<sub>29</sub>ClN<sub>2</sub>O<sub>2</sub>H<sup>+</sup> 497.1990, found 497.1991; IR (KBr, thin film, cm<sup>-1</sup>): ν<sub>max</sub> 3345, 2976, 1689, 1623, 1259, 1148, 832.

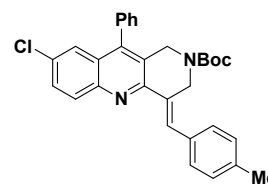

***Tert-butyl-8-chloro-4-(4-methoxybenzylidene)-10-phenyl-3,4-dihydrobenzo[b][1,6] naphthyridine-2(1H)-carboxylate (8b)***: White solid, mp 165–166 °C,

86% yield. <sup>1</sup>H NMR (400 MHz, CDCl<sub>3</sub>) δ 8.11 (s, 1H), 7.55 – 7.36 (m, 6H), 7.29 (d, *J* = 2.0 Hz, 1H), 7.23 – 7.18 (m, 3H), 6.89 (d, *J* = 8.8 Hz, 2H), 4.72 (s, 2H), 4.39 (s, 2H), 3.78 (s, 3H), 1.22 (s, 9H); <sup>13</sup>C NMR (100 MHz, CDCl<sub>3</sub>+ DMSO-d<sub>6</sub>) δ 163.3, 159.6, 152.9, 148.6, 146.8, 144.5, 139.1, 134.3, 132.5, 131.7, 130.1, 129.4, 128.3, 127.8, 126.7, 124.8, 122.7, 121.6, 117.8, 71.0, 57.7, 55.7, 50.3, 44.8, 28.1; HRMS (ESI, m/z): Calcd. For C<sub>31</sub>H<sub>29</sub>ClN<sub>2</sub>O<sub>3</sub>H<sup>+</sup> 513.1939, found 513.0981; IR (KBr, thin film, cm<sup>-1</sup>): ν<sub>max</sub> 3411, 2921, 1604, 1254, 1165, 1032, 830.

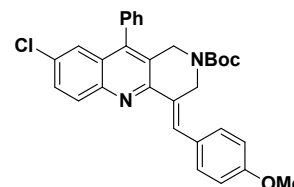

***Tert-butyl-8-chloro-4-(4-hydroxybenzylidene)-10-phenyl-3,4-dihydrobenzo[b][1,6]***

***naphthyridine-2(1H)-carboxylate (8c)***: Yellow solid, mp 172–173 °C, 86% yield. <sup>1</sup>H NMR (400 MHz, CDCl<sub>3</sub>) δ 8.08–7.93 (m, 2H), 7.54–7.49 (m, 6H), 7.47 (s, 2H), 7.29–7.16 (m, 3H), 4.64 (s, 2H), 4.41 (s, 2H), 1.18 (s, 9H); <sup>13</sup>C NMR (100 MHz, CDCl<sub>3</sub>) δ 154.5, 150.3, 145.4, 144.6, 138.8, 136.3, 134.6, 132.1, 131.8, 131.0, 130.9, 130.1, 130.0, 129.0, 128.9, 128.7, 127.2, 125.9, 124.6, 115.6, 80.1, 64.1, 44.5, 28.3; HRMS (ESI, m/z): Calcd. For C<sub>30</sub>H<sub>27</sub>ClN<sub>2</sub>O<sub>3</sub>H<sup>+</sup> 499.1783, found 499.1799; IR (KBr, thin film, cm<sup>-1</sup>): ν<sub>max</sub> 3778, 3348, 3024, 2975, 1633, 1570, 1170, 955, 829.

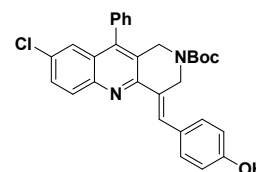

***Tert-butyl-8-chloro-4-(3,4-dimethoxybenzylidene)-10-phenyl-3,4-dihydrobenzo[b][1,6]***

***naphthyridine-2(1H)-carboxylate (8d)***: Pale yellow solid, mp 140–141 °C, 85% yield. <sup>1</sup>H NMR (400 MHz, CDCl<sub>3</sub>) δ 8.08 (s, 2H), 7.54 – 7.45 (m, 4H), 7.29 – 7.21 (m, 3H), 7.03 – 6.96 (m, 2H), 6.86 (d, *J* = 8.4 Hz, 1H), 4.73 (s, 2H), 4.40 (s, 2H), 3.86 (d, *J* = 4.4 Hz, 6H), 1.23 (s, 9H); <sup>13</sup>C NMR (100 MHz, CDCl<sub>3</sub>) δ 154.6, 148.9, 148.7, 145.6, 141.3, 134.6, 134.1, 133.2, 131.9, 131.0, 130.1, 130.1, 129.1, 128.7, 128.7, 128.3, 127.3, 126.0, 122.7, 118.4,

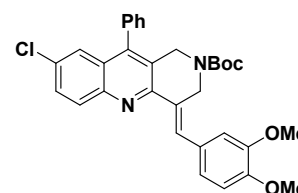

114.7, 111.0, 80.2, 55.9, 50.8, 45.0, 28.3; HRMS (ESI, m/z): Calcd. For C<sub>32</sub>H<sub>31</sub>ClN<sub>2</sub>O<sub>4</sub>H<sup>+</sup> 543.2045, found 543.2054; IR (KBr, thin film, cm<sup>-1</sup>): ν<sub>max</sub> 3345, 3066, 2976, 1683, 1578, 1260, 1160, 1143, 1077, 827.

***Tert-butyl-4-(4-bromobenzylidene)-8-chloro-10-phenyl-3,4-dihydrobenzo[b][1,6]***

***naphthyridine-2(1H)-carboxylate (8e)***: White solid, mp 168–169 °C, 90% yield. <sup>1</sup>H NMR (400 MHz, CDCl<sub>3</sub>) δ 8.04 (s, 1H), 7.99–7.88 (m 1H), 7.53–7.45 (m, 4H), 7.28–7.25 (m, 3H), 7.21–7.15 (m, 3H), 4.63 (s, 2H), 4.39–3.34 (m, 2H), 1.17 (s, 9H); <sup>13</sup>C NMR (100 MHz, CDCl<sub>3</sub>) δ 156.5, 151.2, 147.0, 141.6, 139.9, 136.6, 136.3, 134.2, 133.9, 133.6, 133.0, 132.2, 132.1, 131.1, 131.0, 130.7, 130.3, 129.3, 128.0, 126.6, 82.4, 60.6, 46.6, 30.3; HRMS (ESI, thin film, m/z): Calcd. For C<sub>30</sub>H<sub>26</sub>BrClN<sub>2</sub>O<sub>2</sub>H<sub>2</sub><sup>+</sup> 562.1012, found 562.9716; IR (KBr, cm<sup>-1</sup>): ν<sub>max</sub> 3410, 3030, 2974, 1689, 1242, 1149, 832, 703.

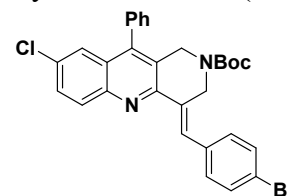

***Tert-butyl-8-chloro-4-(3-nitrobenzylidene)-10-phenyl-3,4-dihydrobenzo[b][1,6]-naphthyridine-2(1H)-carboxylate (8f)***: White solid, mp 185–186 °C, 85% yield. <sup>1</sup>H NMR (400 MHz, CDCl<sub>3</sub>) δ 8.22 (d, *J* = 8.8 Hz, 3H), 8.01 (d, *J* = 8.8 Hz, 1H), 7.51–7.54 (m, 3H), 7.52–7.46 (m, 3H), 7.31 (s, 1H), 7.22–7.18 (m, 2H), 4.65 (s, 2H), 4.44 (s, 2H), 1.18 (s, 9H); <sup>13</sup>C NMR (100 MHz, CDCl<sub>3</sub>) δ 153, 146.5, 145.3, 140.4, 134.9, 134.4, 132.4, 131.5, 131.0, 130.2, 129.7, 129.0, 128.7, 128.7, 128.6, 128.1, 127.4, 127.0, 126.2, 124.4, 123.5, 121.1, 80.3, 55.1, 44.3, 27.9; HRMS (ESI, m/z): Calcd. For C<sub>30</sub>H<sub>26</sub>ClN<sub>3</sub>O<sub>4</sub>H<sup>+</sup> 528.1685, found 528.1698; IR (KBr, thin film, cm<sup>-1</sup>): ν<sub>max</sub> 3350, 3060, 2974, 2841, 1693, 1645, 1514, 1150, 834.

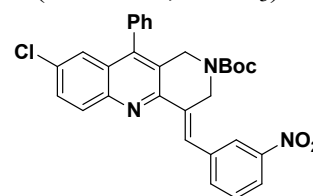

***Tert-butyl-8-chloro-4-(4-(dimethylamino)benzylidene)-10-phenyl-3,4-dihydrobenzo[b][1,6]***

***jnaphthyridine-2(1H)-carboxylate (8g)***: Yellow solid, mp 201–202 °C, 85% yield. <sup>1</sup>H NMR (400 MHz, CDCl<sub>3</sub>) δ 8.08 (d, *J* = 8.8 Hz, 1H), 8.00 (d, *J* = 8.8 Hz, 1H), 7.59–7.56 (m, 6H), 7.44 (d, *J* = 6.0 Hz, 1H), 7.37 (s, 1H), 7.32 (t, *J* = 6.8 Hz 1H), 6.77–6.71 (m, 2H), 4.85 (s, 2H), 4.46 (s, 2H), 3.04 (s, 6H), 1.34 (s, 9H); <sup>13</sup>C NMR (100 MHz, CDCl<sub>3</sub>) δ 154.5, 150.0, 145.7, 134.1, 131.9, 131.4, 130.8, 130.1, 130.0, 129.8, 129.1, 128.9, 128.7, 128.7, 128.5, 128.3, 126.0, 124.6, 111.9, 111.0, 80.1, 45.3, 44.3, 40.3, 28.2; HRMS (ESI, m/z): Calcd. For C<sub>32</sub>H<sub>32</sub>ClN<sub>3</sub>O<sub>2</sub>H<sup>+</sup> 526.2256, found 526.1048; IR (KBr, thin film, cm<sup>-1</sup>): ν<sub>max</sub> 3382, 2979, 2917, 1693, 1602, 1568, 1169, 818.

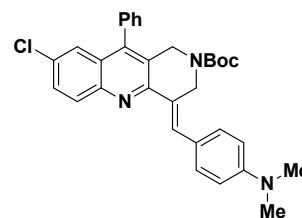

4.  $^1\text{H}$  NMR,  $^{13}\text{C}$  NMR and Mass spectra of the new compounds:

*Ethyl 6-chloro-2-methyl-4-phenylquinoline-3-carboxylate (3b):*

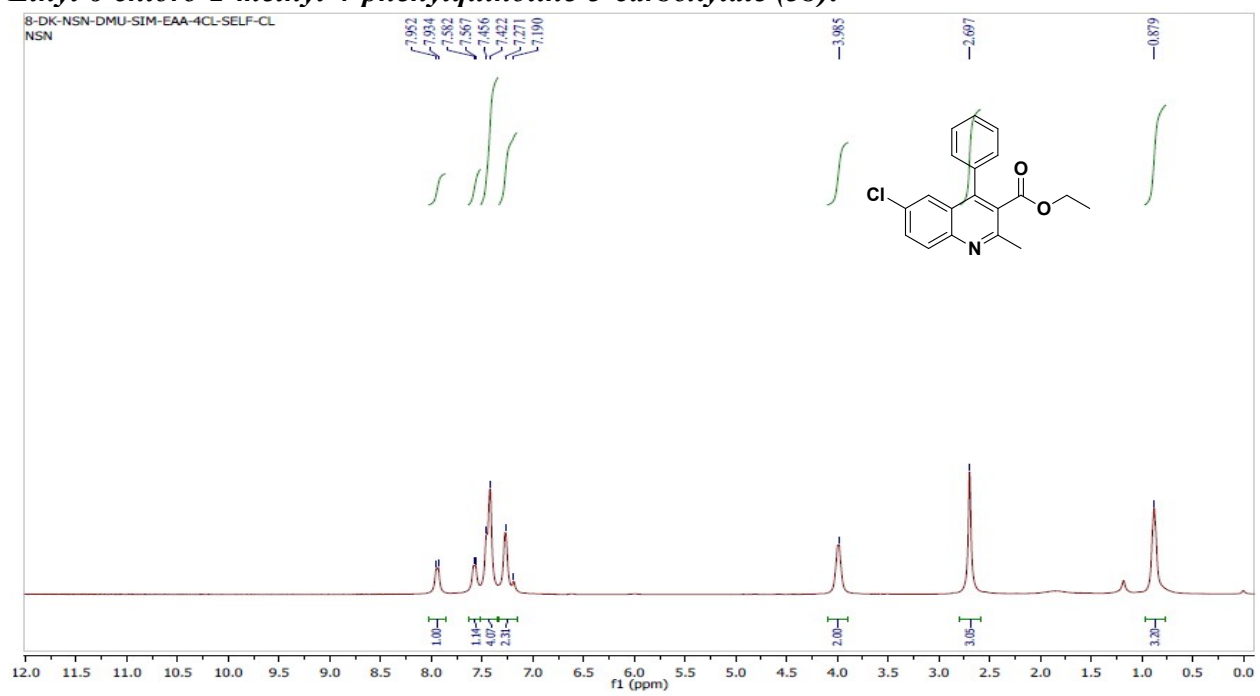

**6-Chloro-2,3-dimethyl-4-phenylquinoline (3c):**

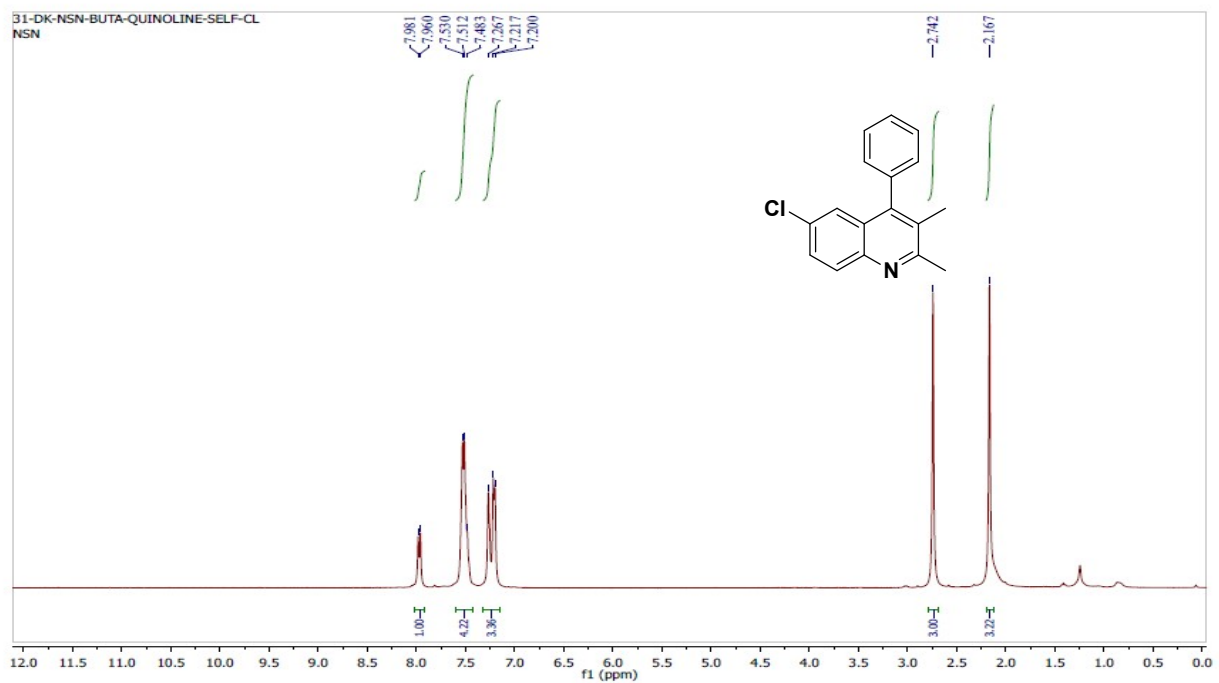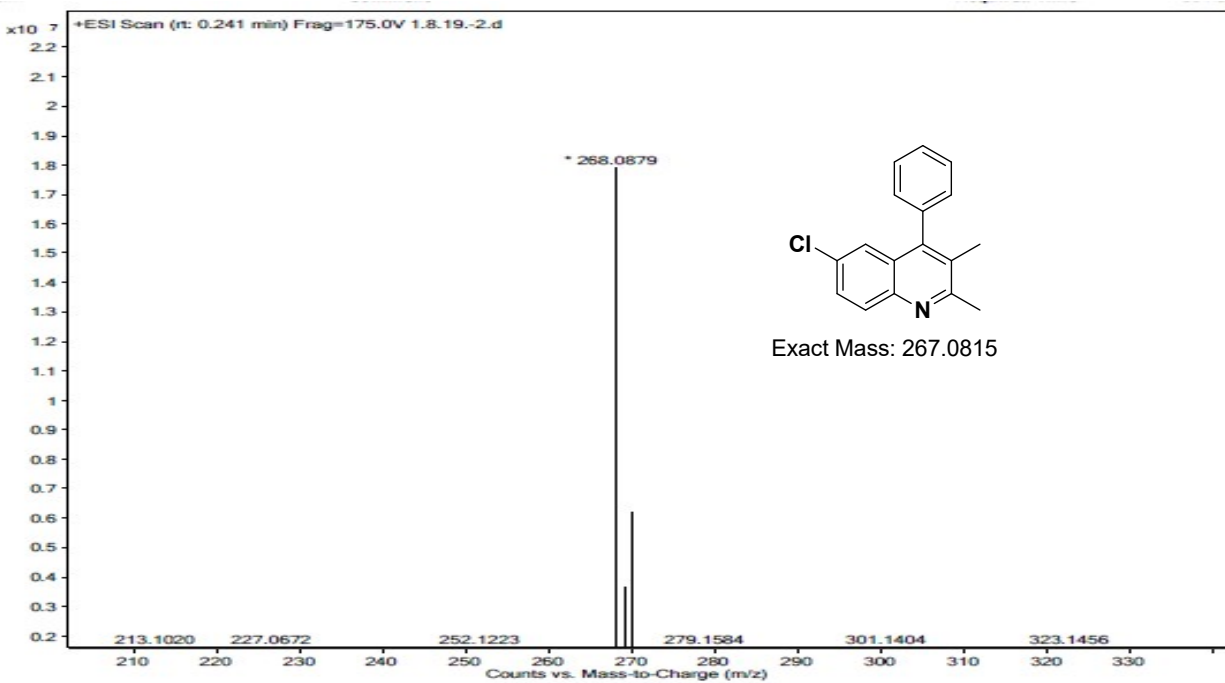

**Tert-butyl-8-chloro-10-phenyl-3,4-dihydrobenzo[b][1,6]naphthyridine-2(1H)-carboxylate (3f):**

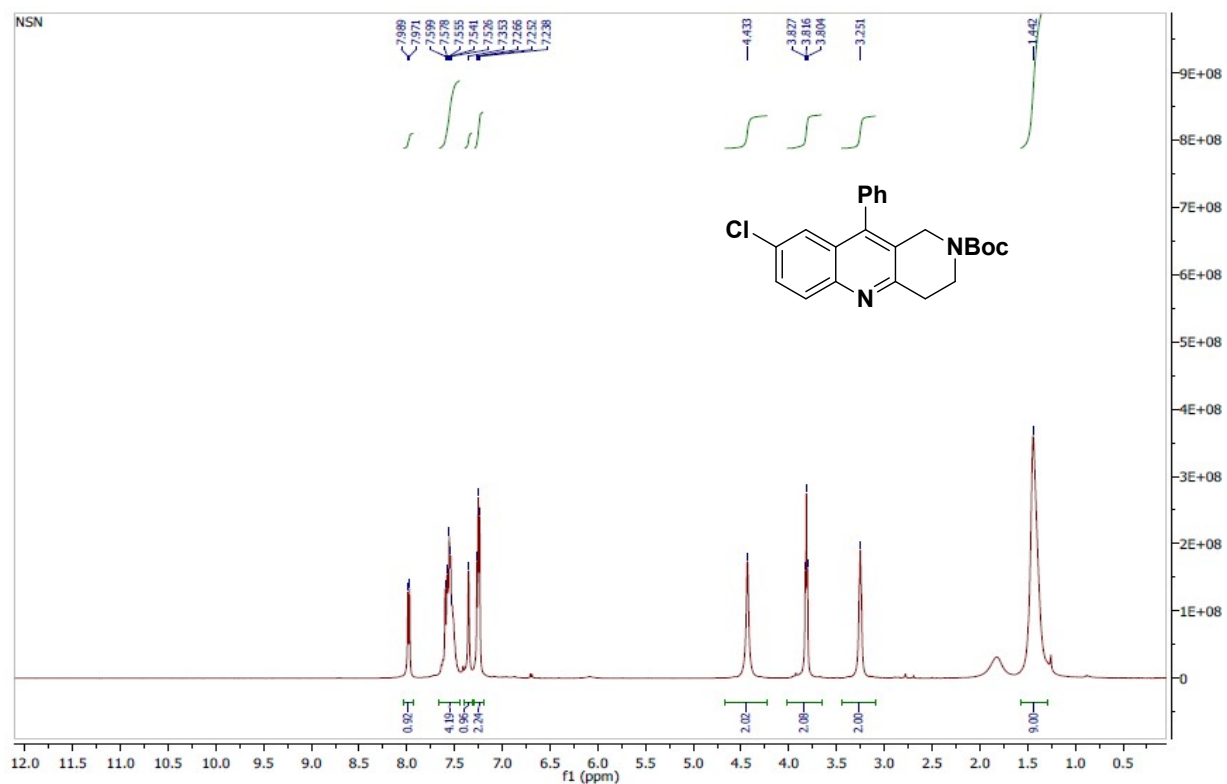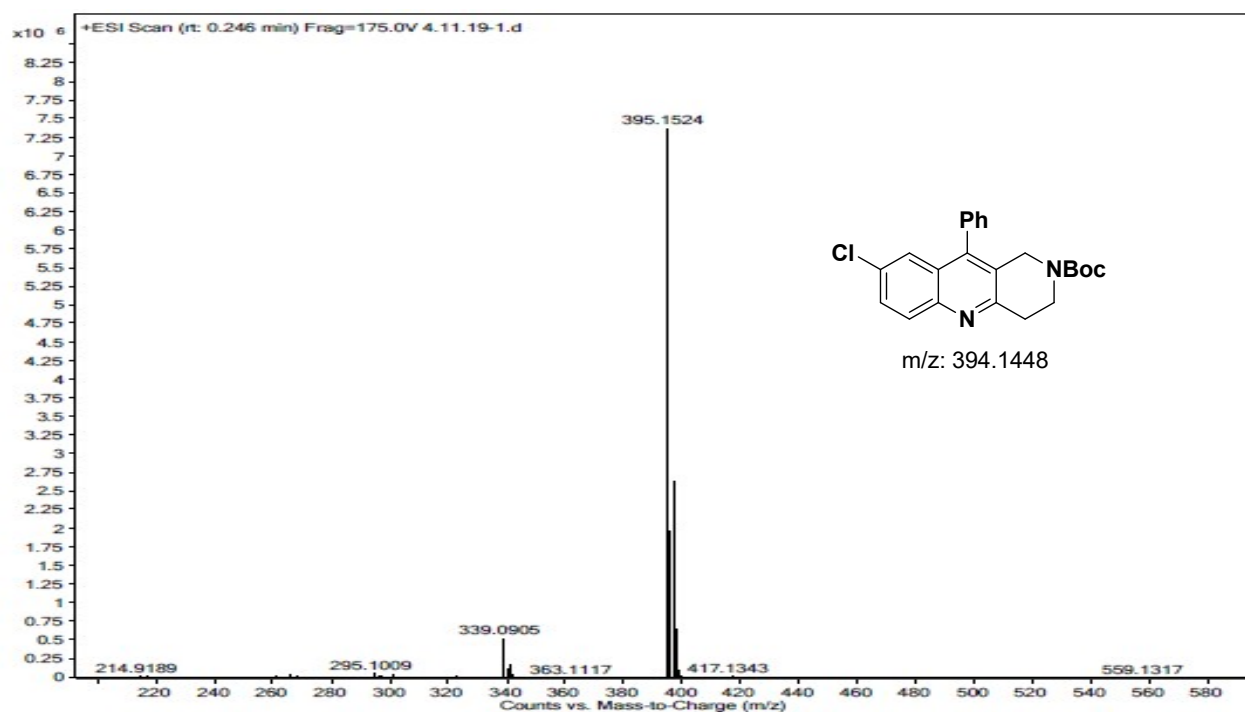

*(E)*-Methyl 6-chloro-4-phenyl-2-styrylquinoline-3-carboxylate (5a):

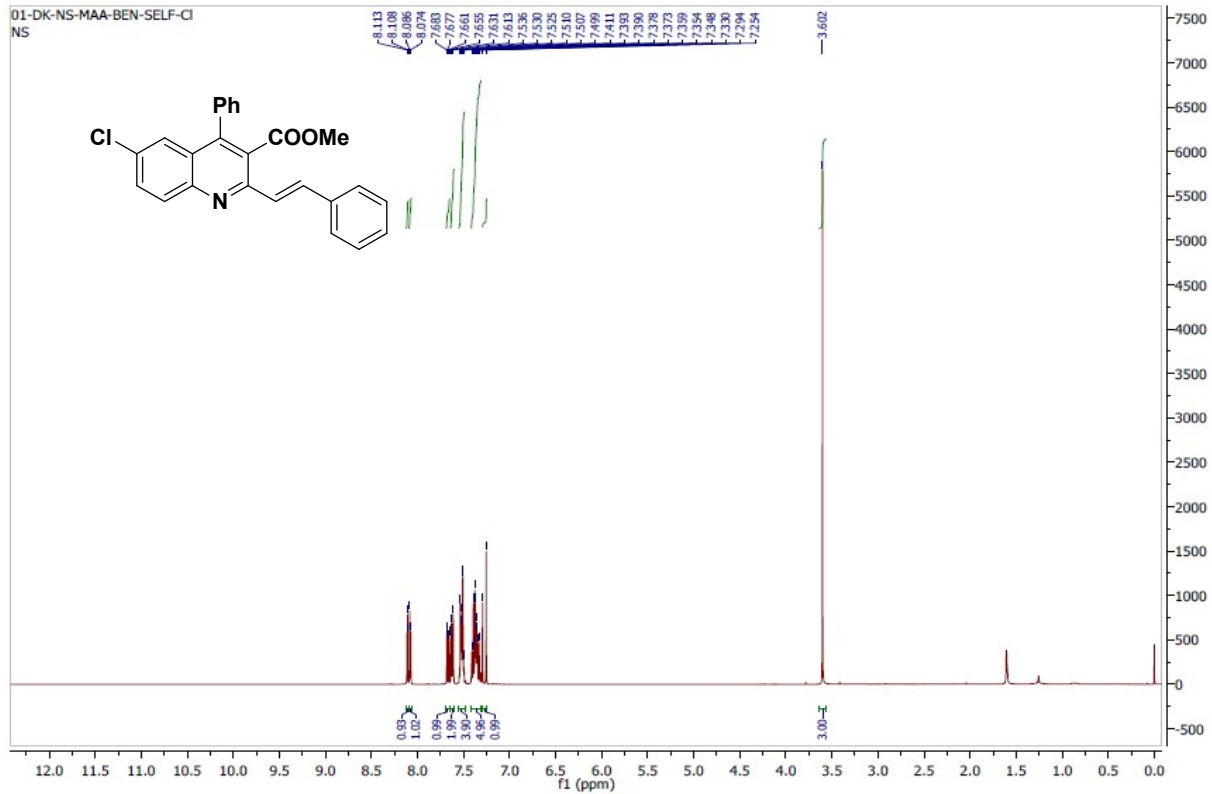

**Methyl- 6-chloro-2-(3-nitrostyryl)-4-phenylquinoline-3-carboxylate (5b):**

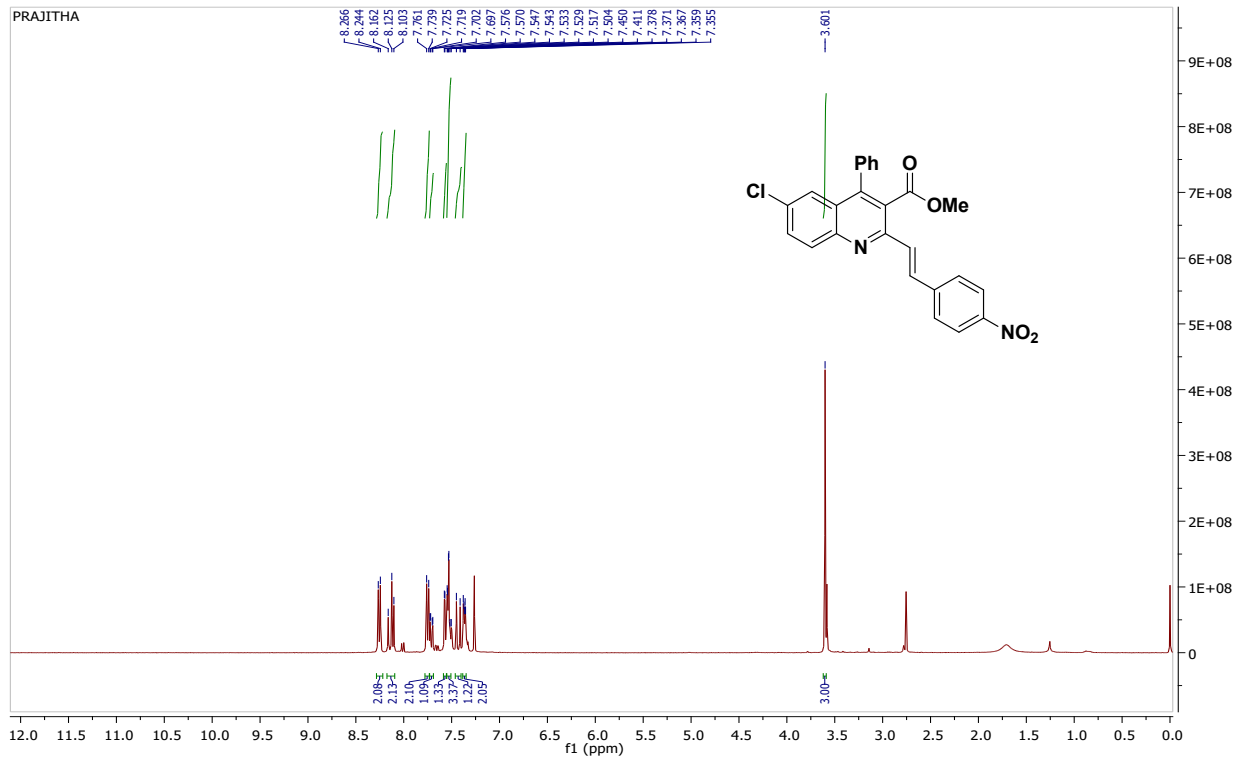

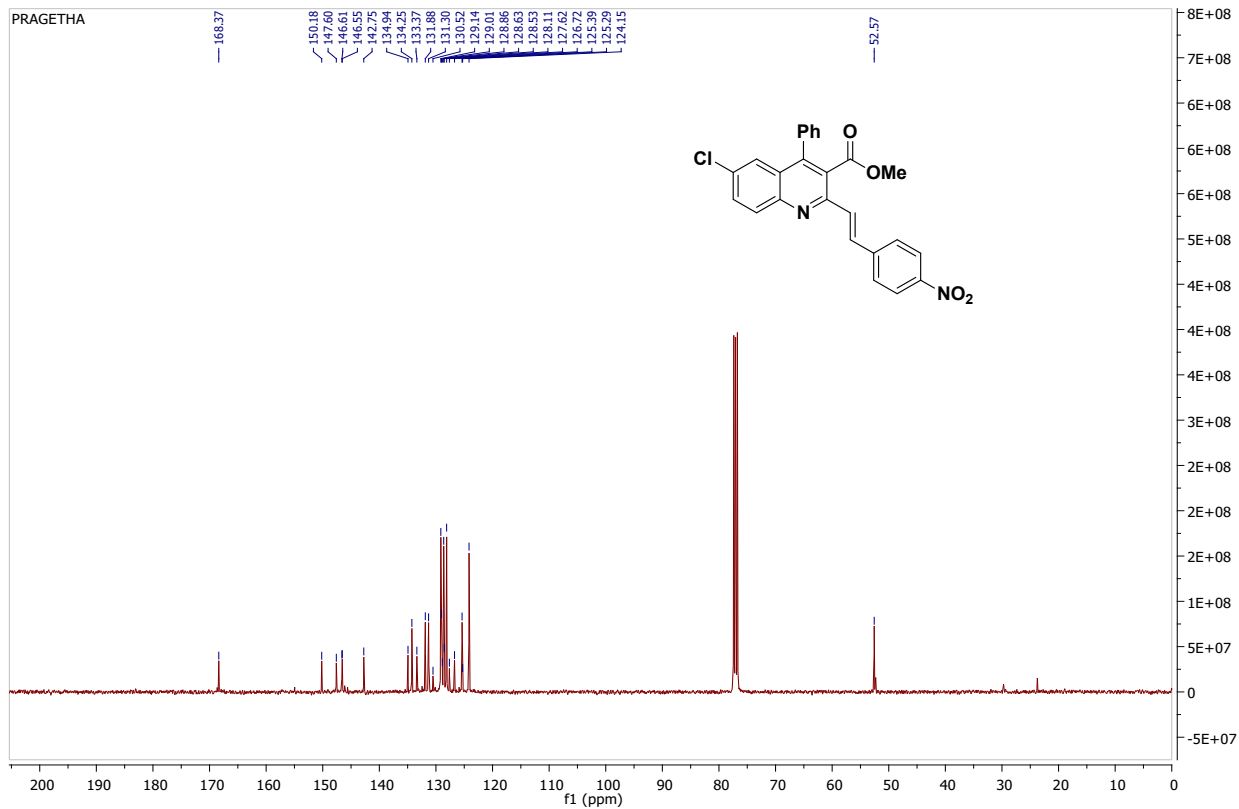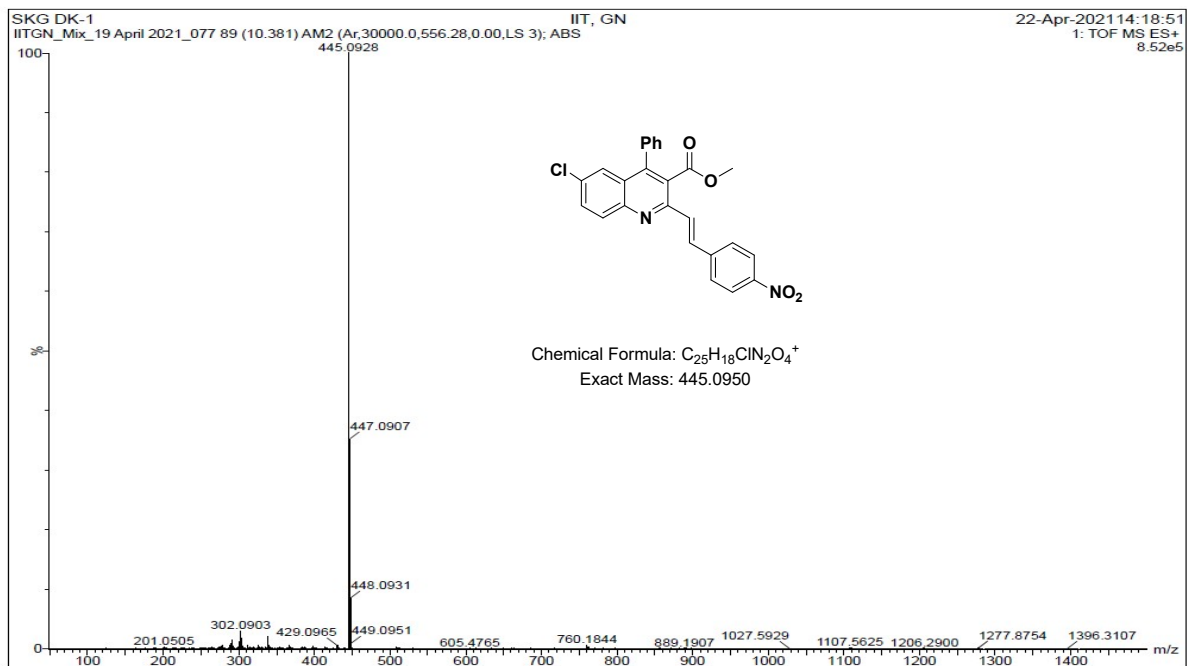

***Methyl-6-chloro-2-(4-methoxystyryl)-4-phenylquinoline-3-carboxylate (5c):***



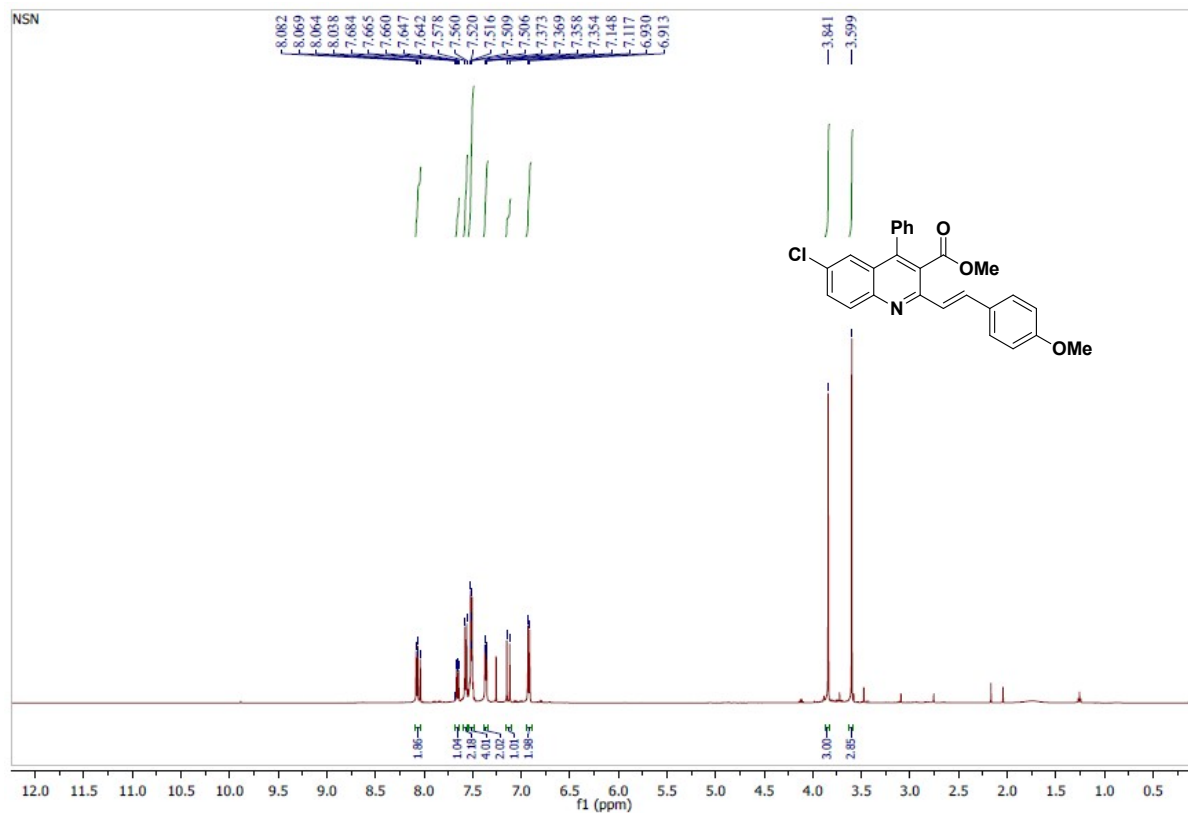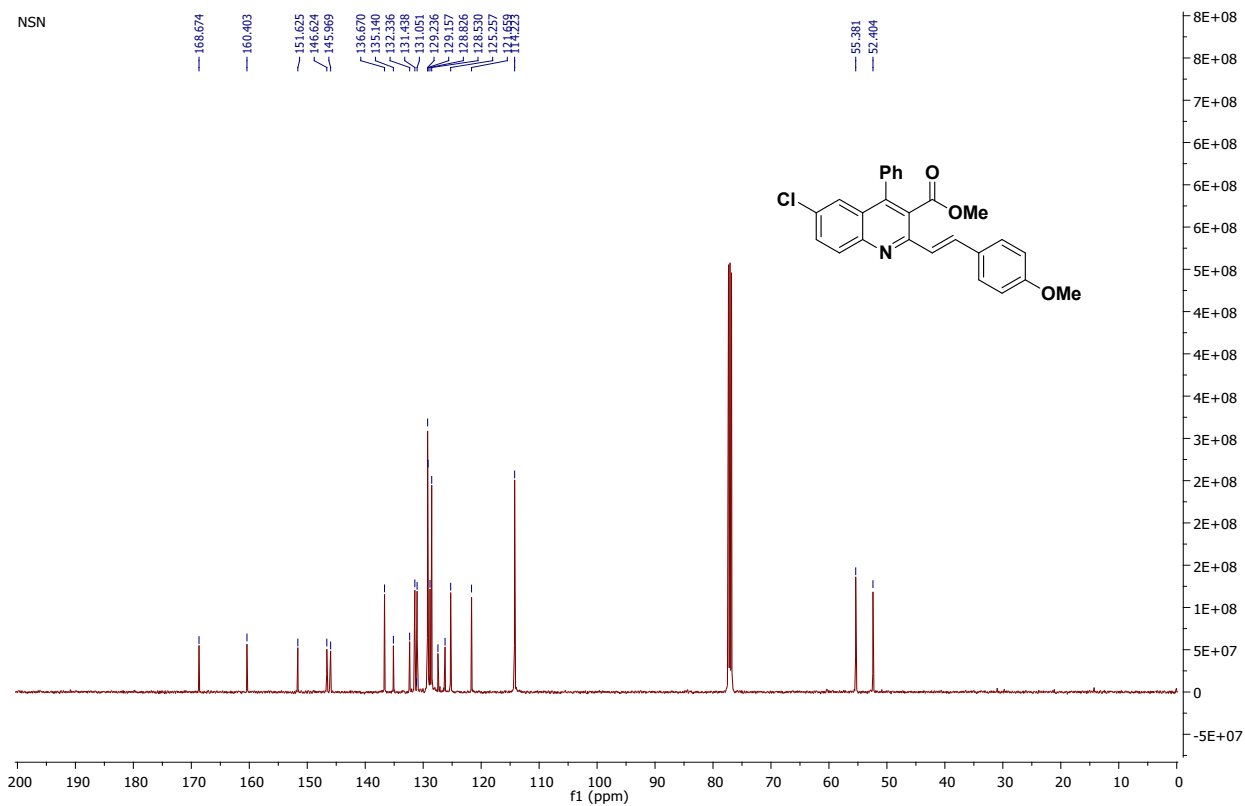

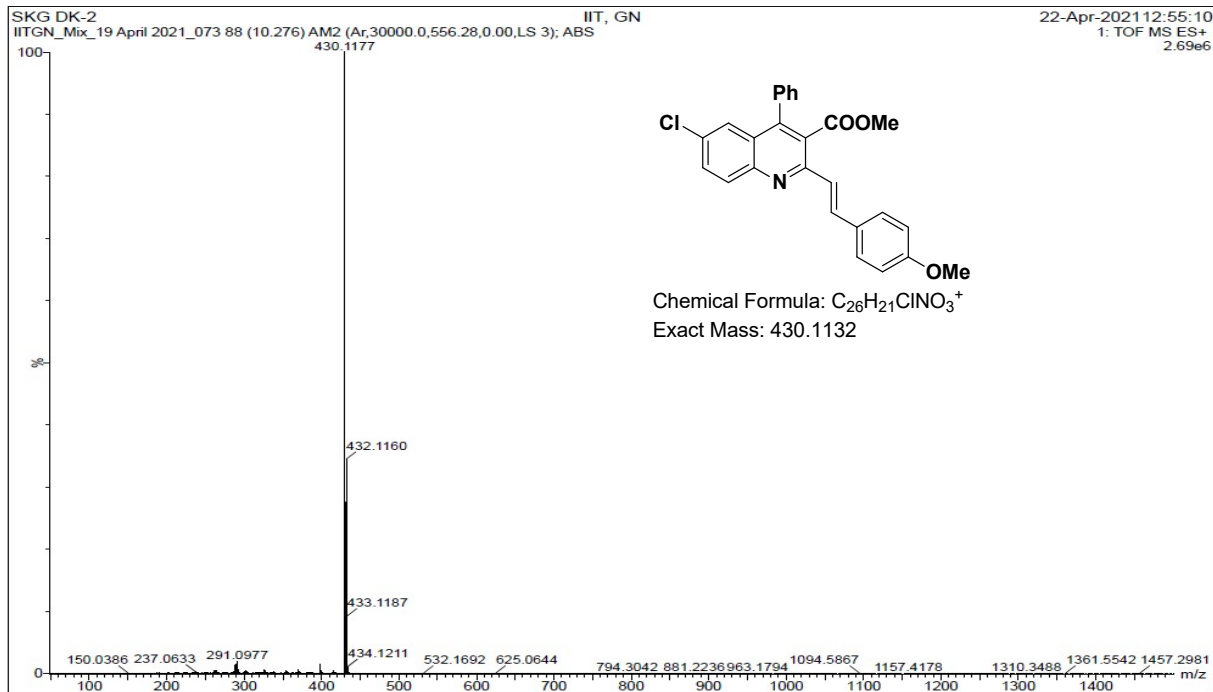

**Methyl -6-chloro-2-(4-methylstyryl)-4-phenylquinoline-3-carboxylate (5d):**

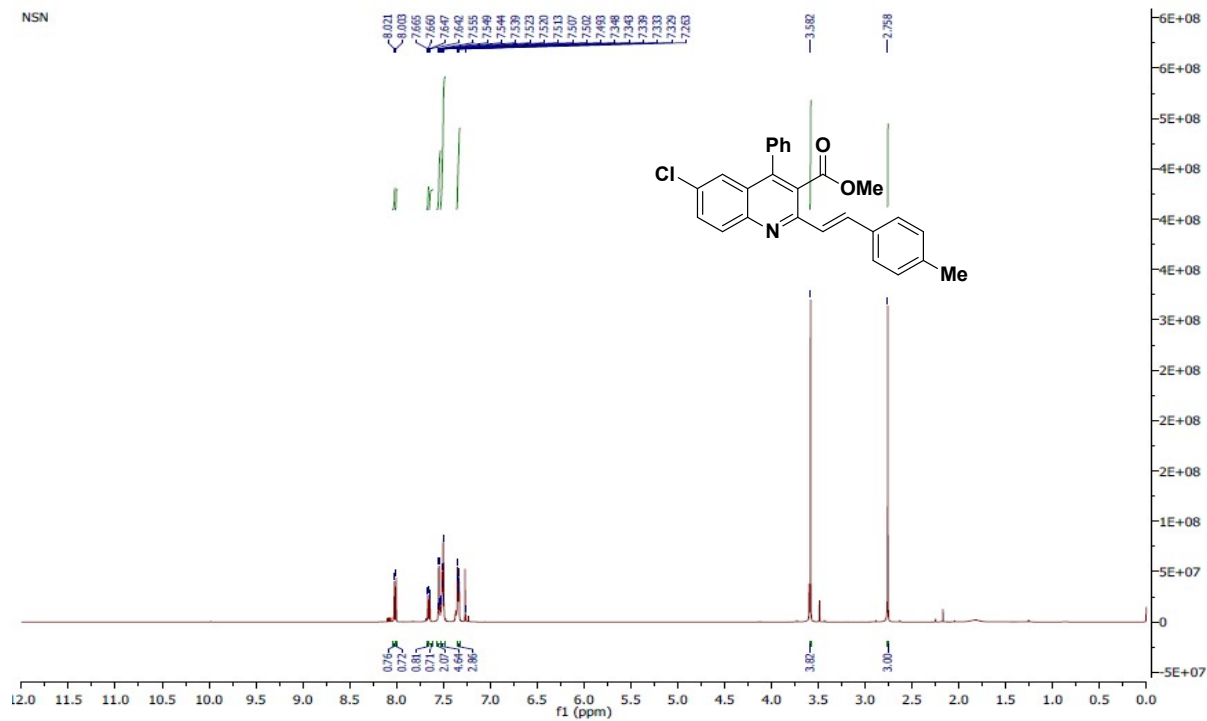

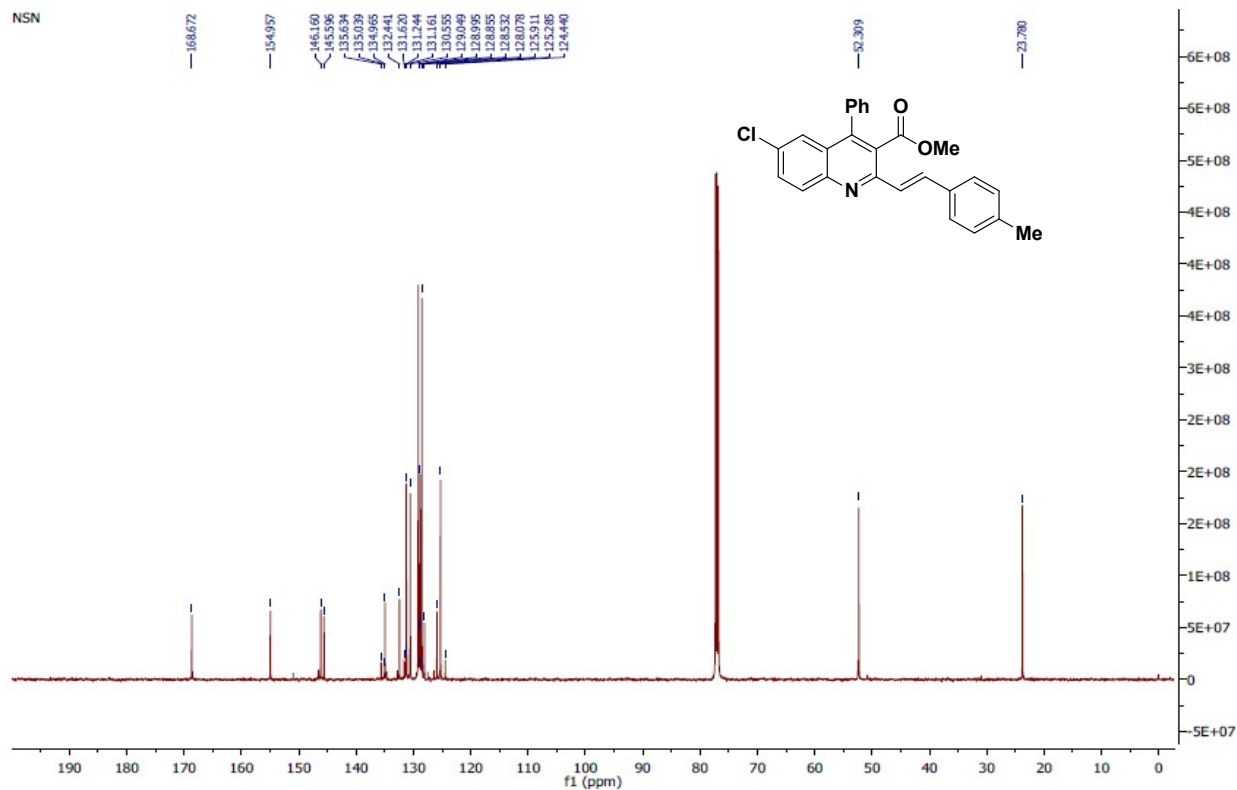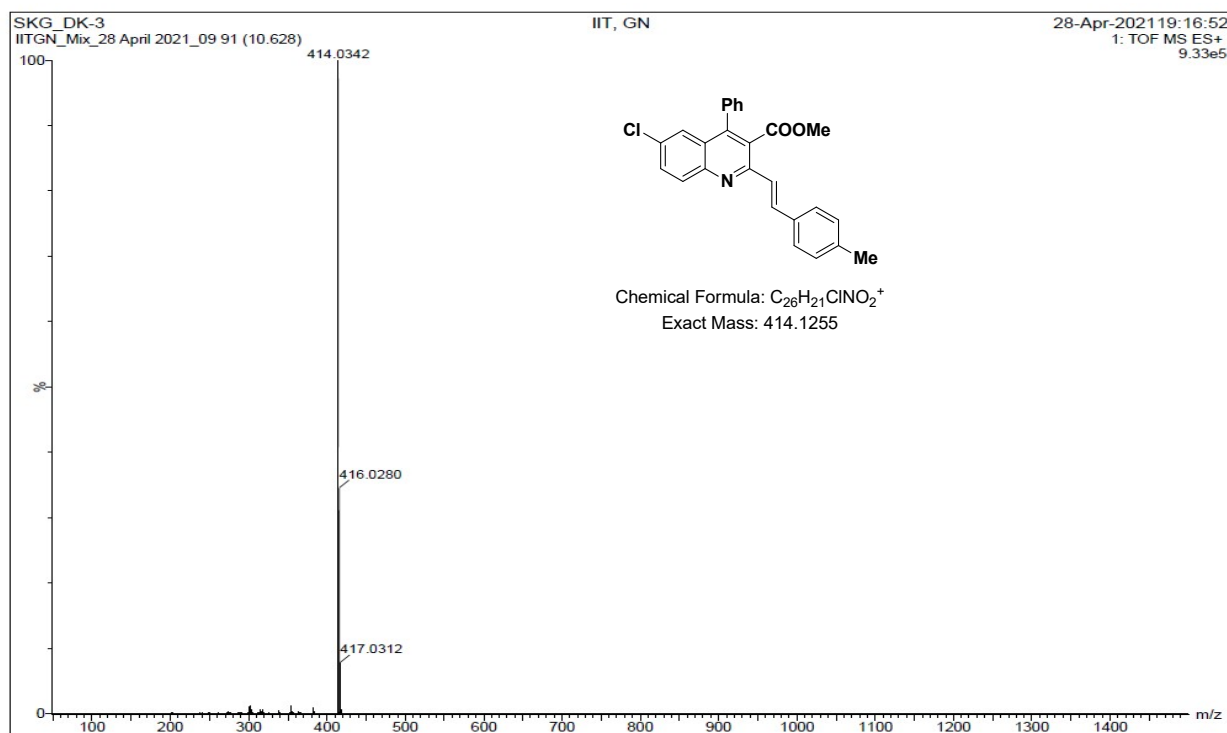

***Ethyl 6-chloro-2-(4-methylstyryl)-4-phenylquinoline-3-carboxylate (5h):***

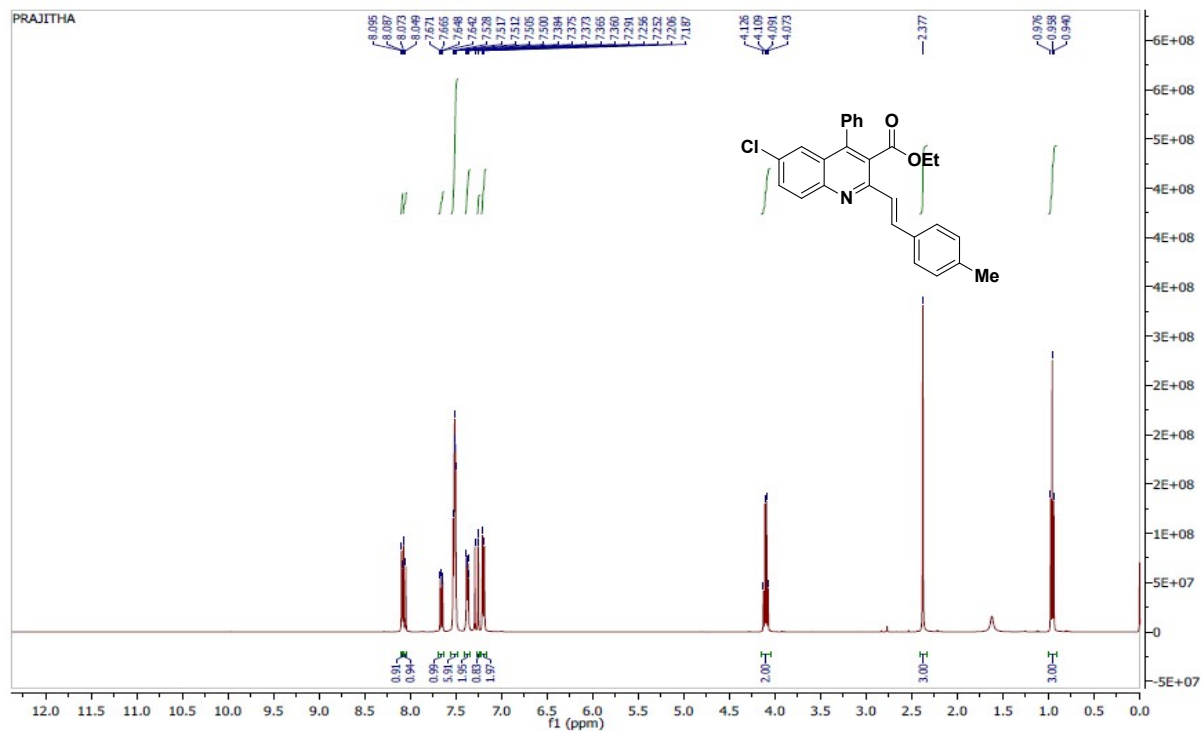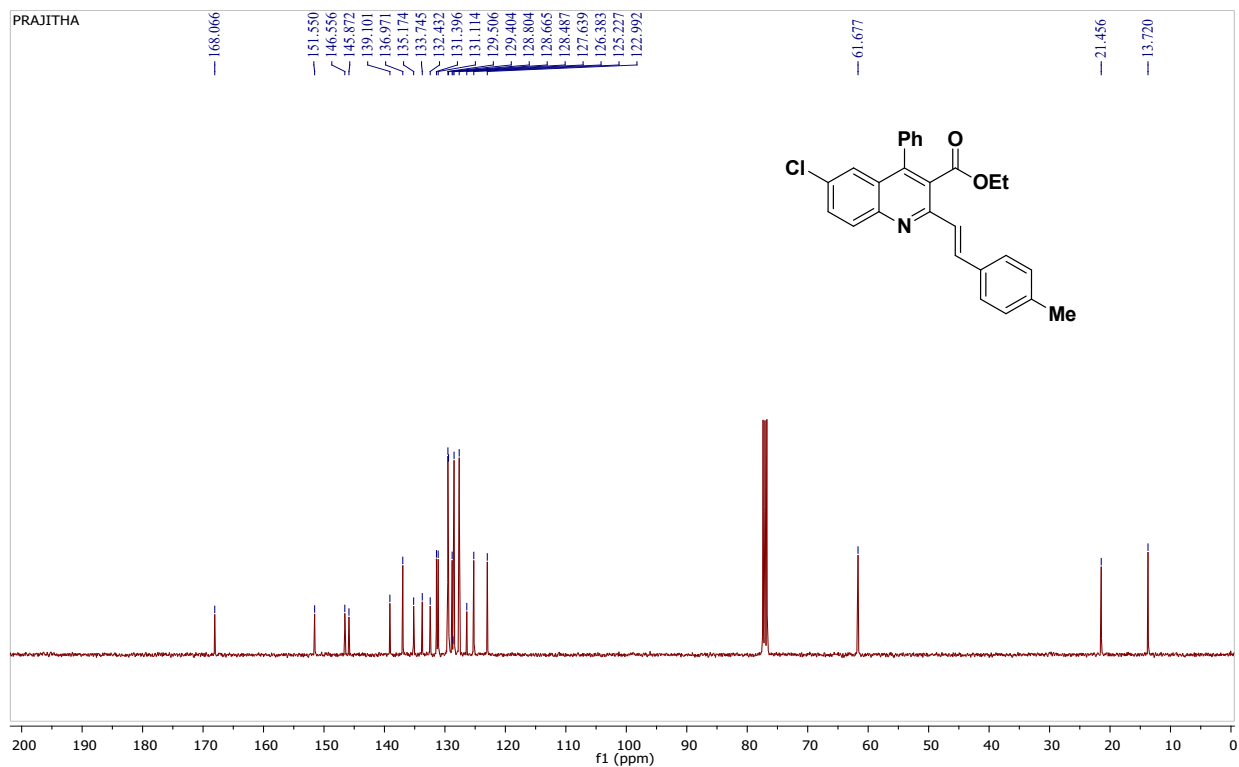

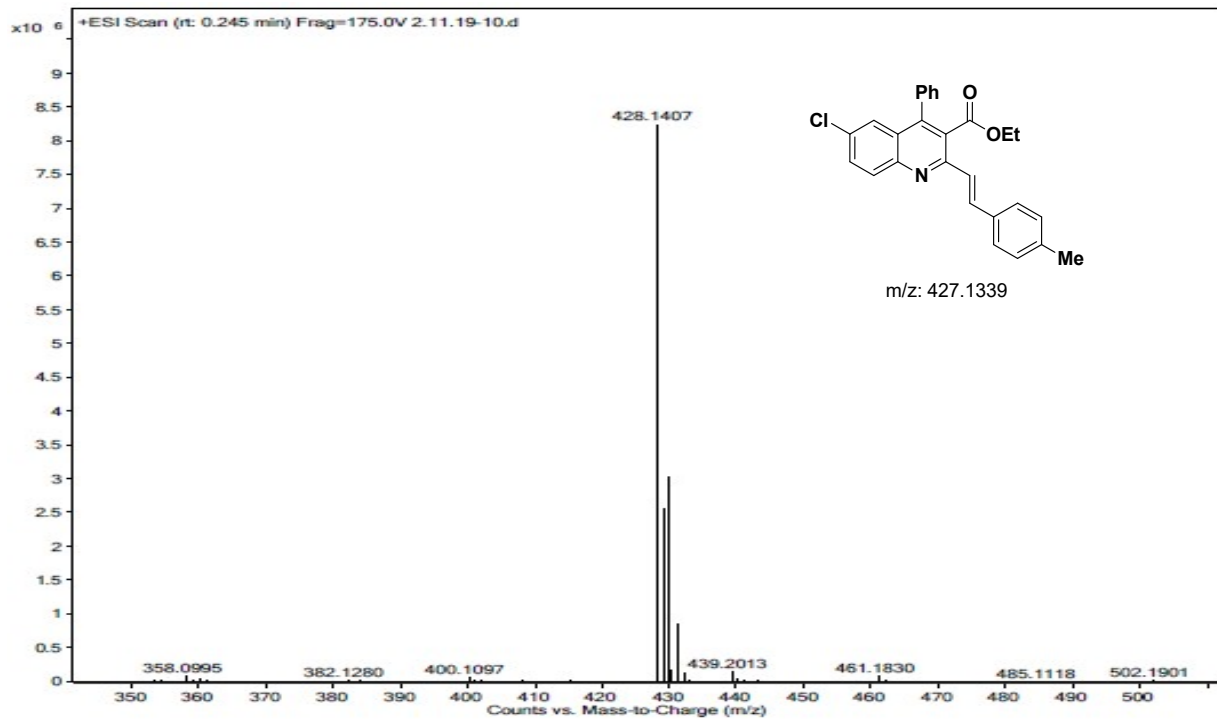

***Ethyl-6-chloro-2-(2-methoxystyryl)-4-phenylquinoline-3-carboxylate (5i):***

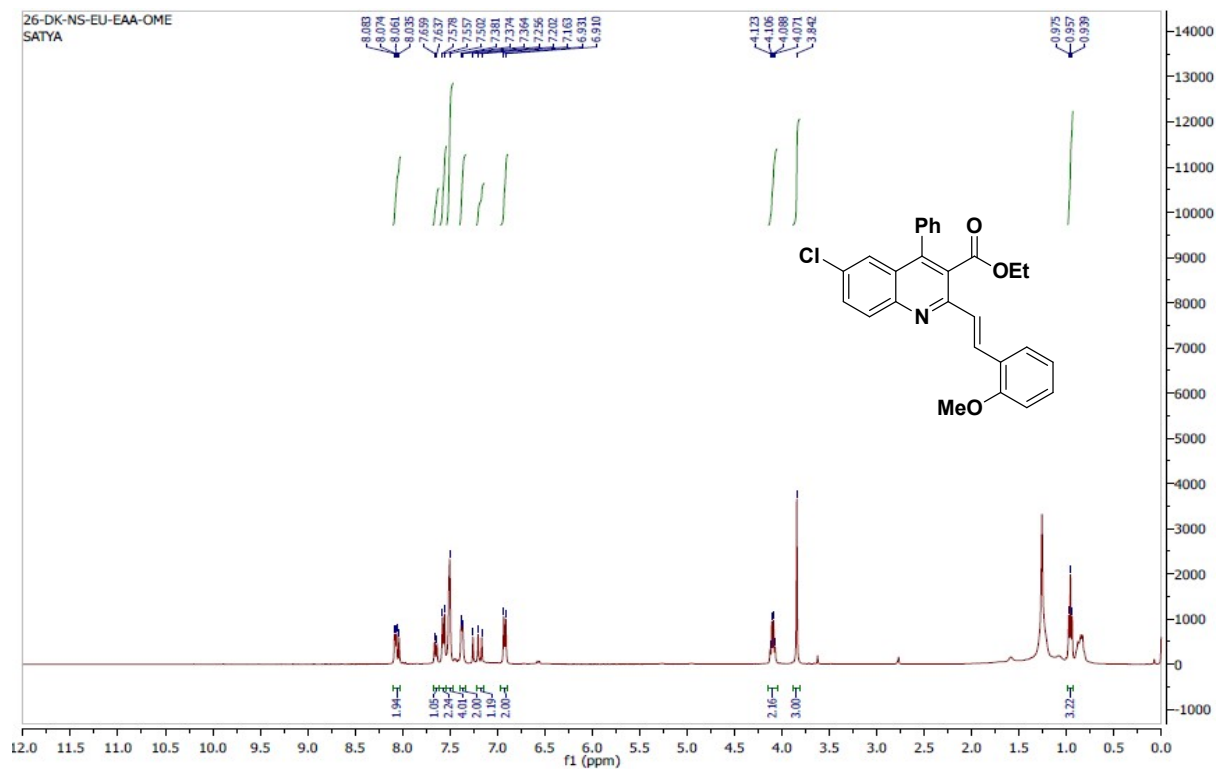

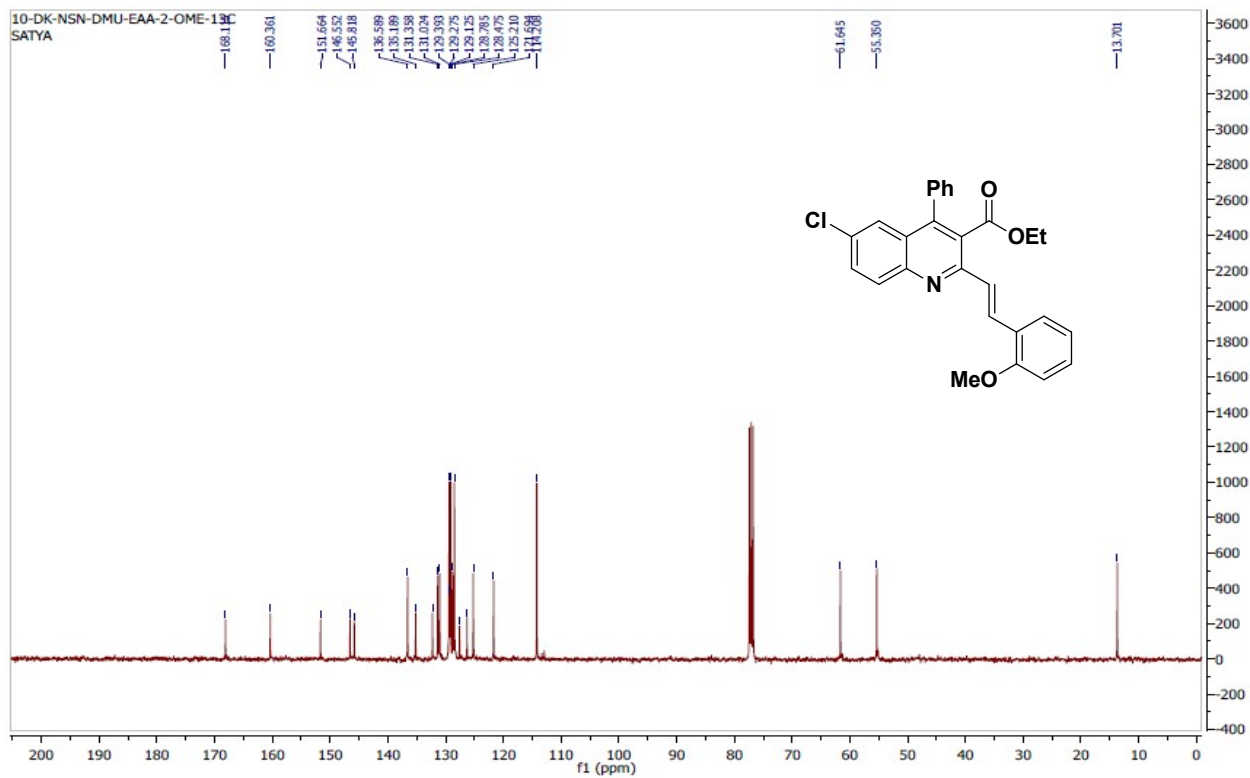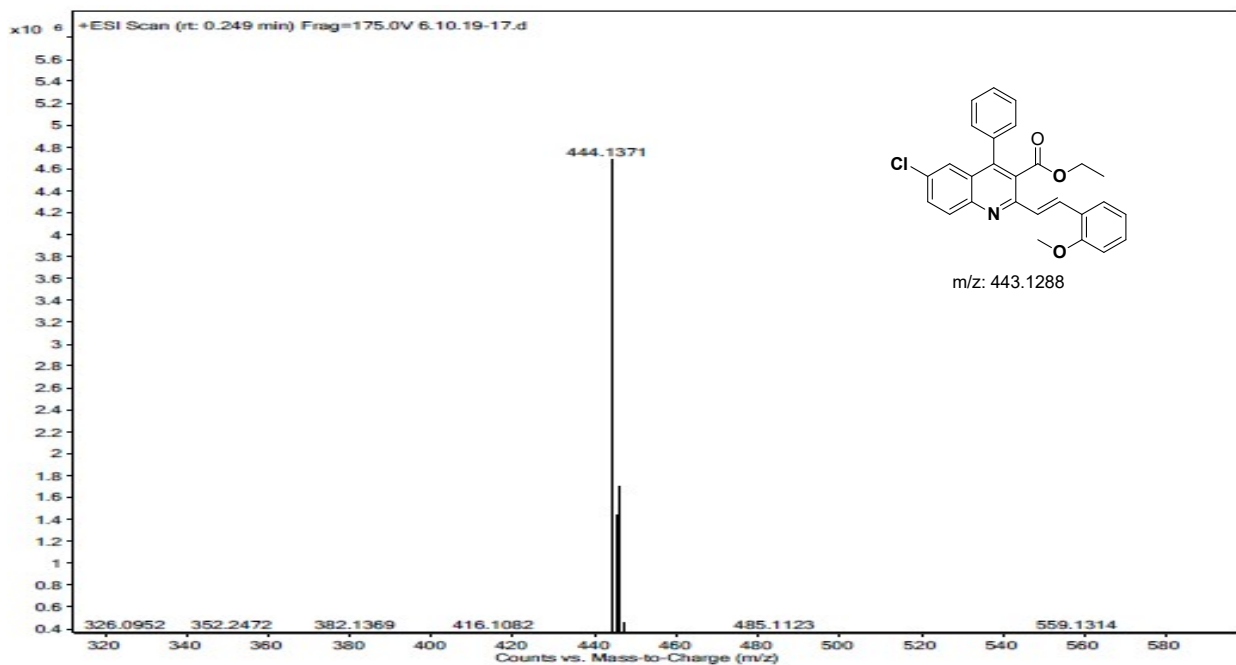

*Ethyl-2-(4-bromostyryl)-6-chloro-4-phenylquinoline-3-carboxylate (51):*

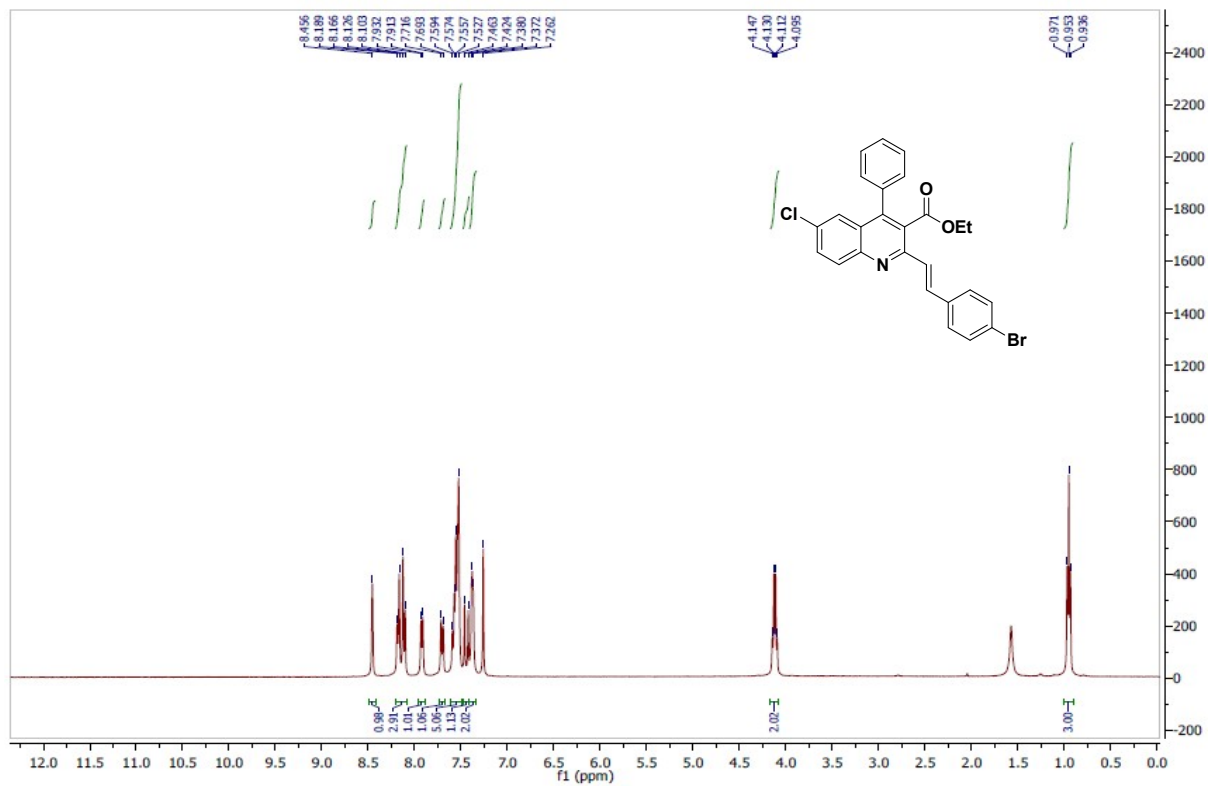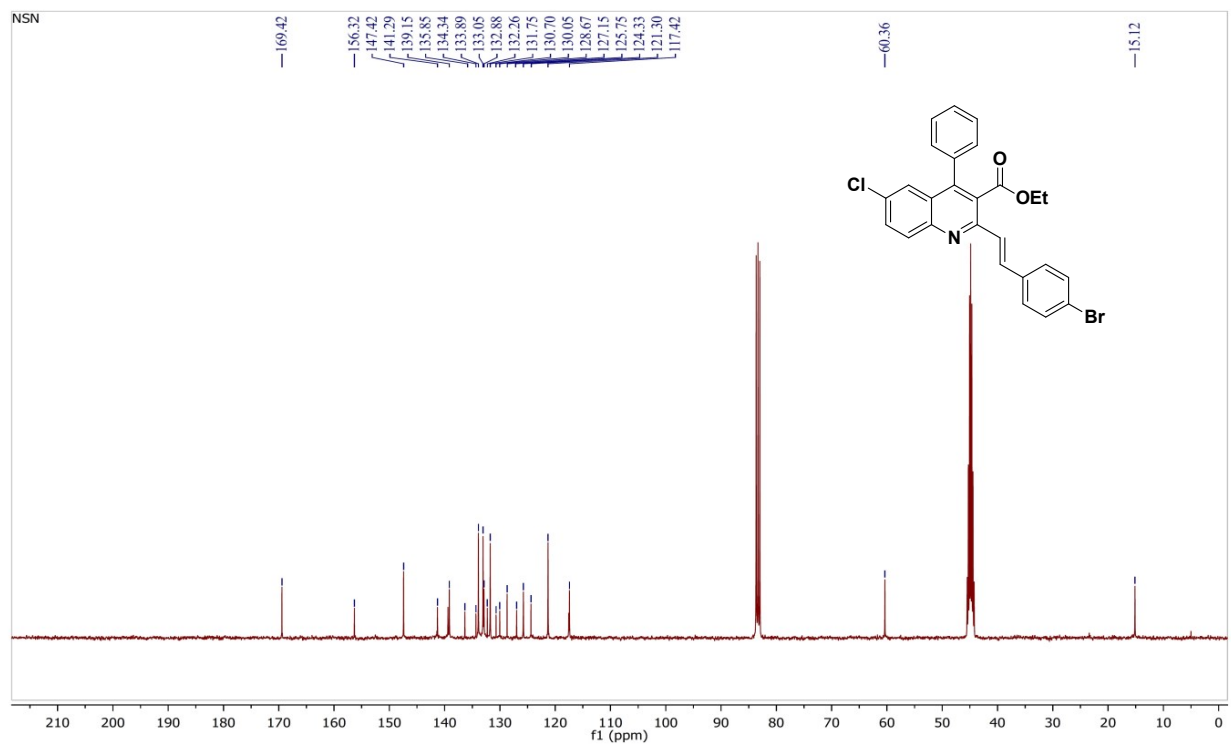

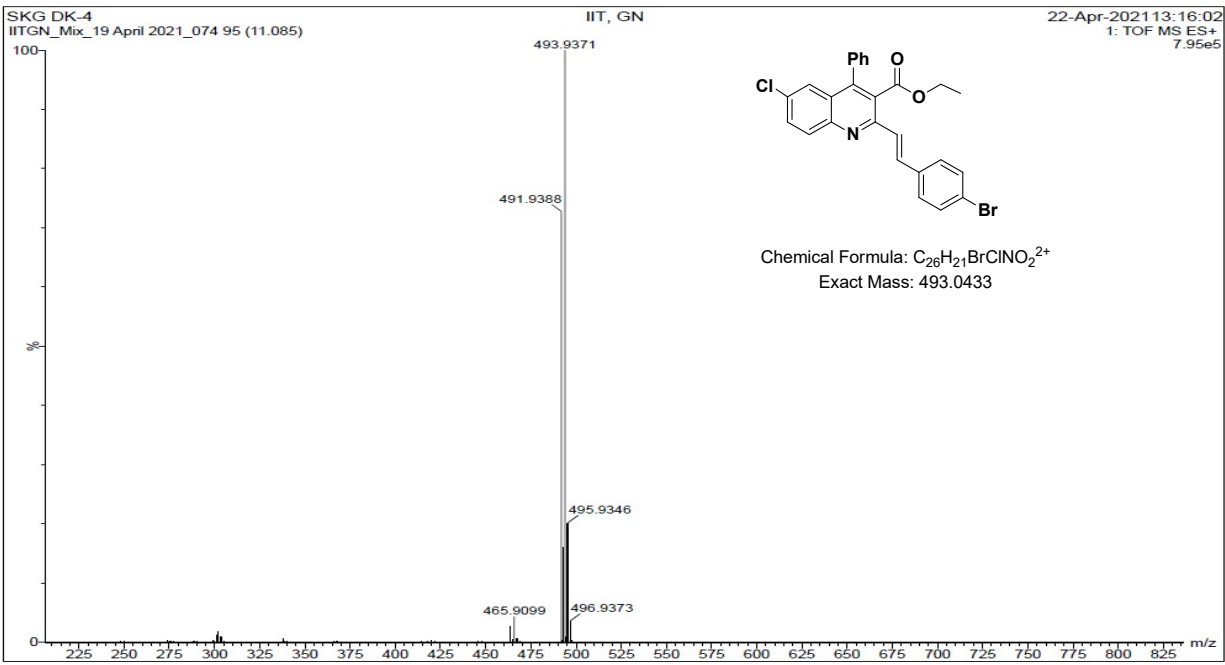

***Ethyl 6-chloro-2-(3-nitrostyryl)-4-phenylquinoline-3-carboxylate (5m):***



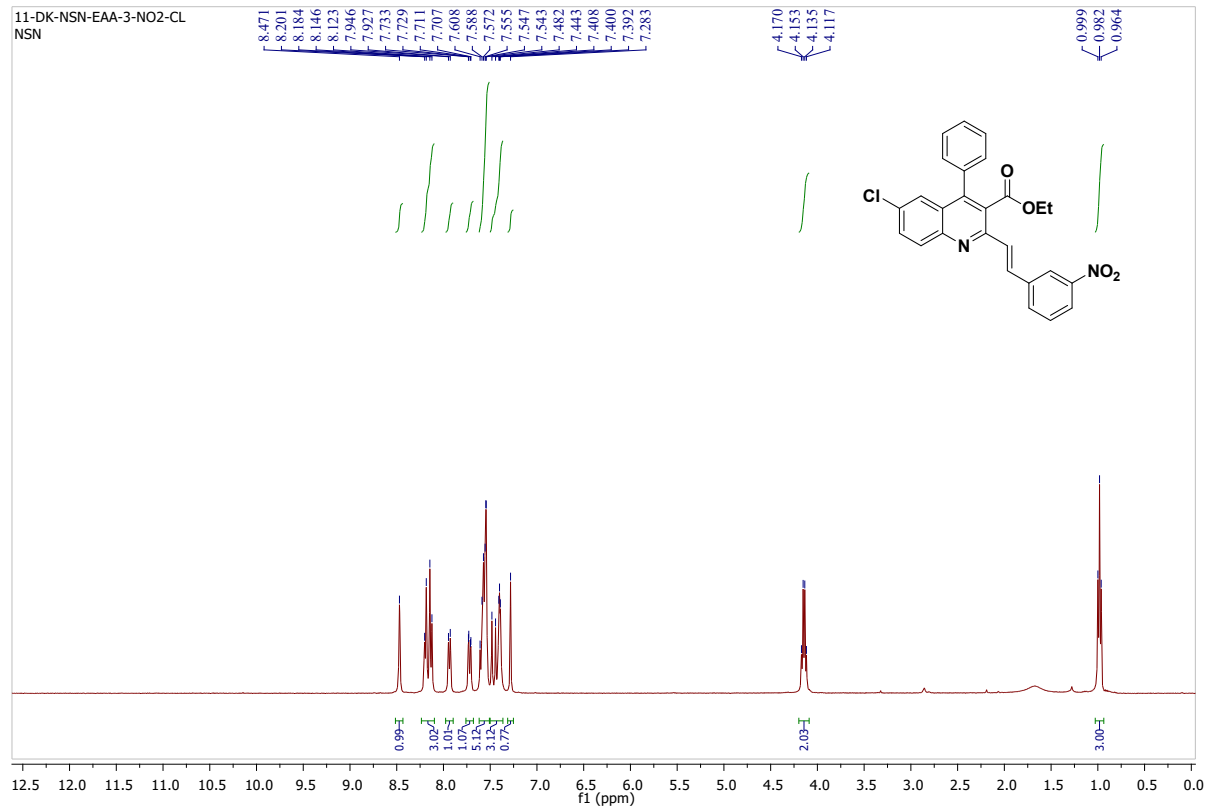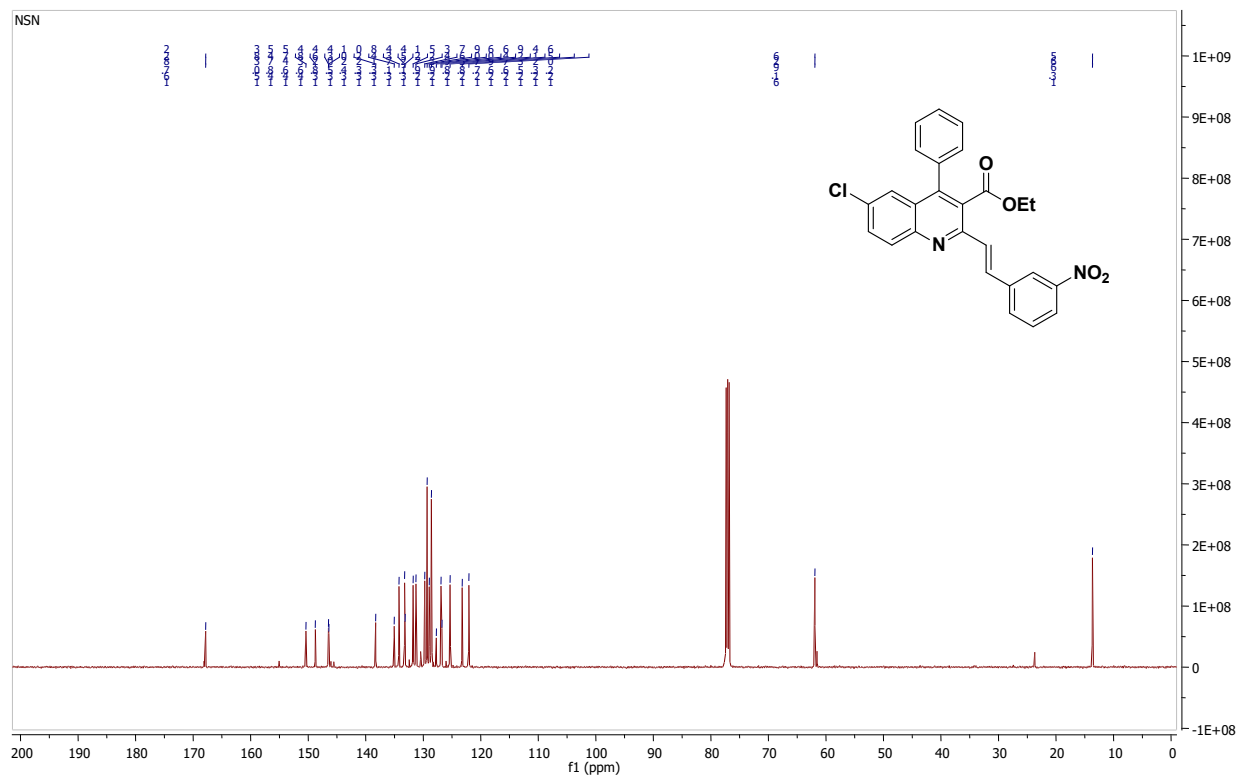

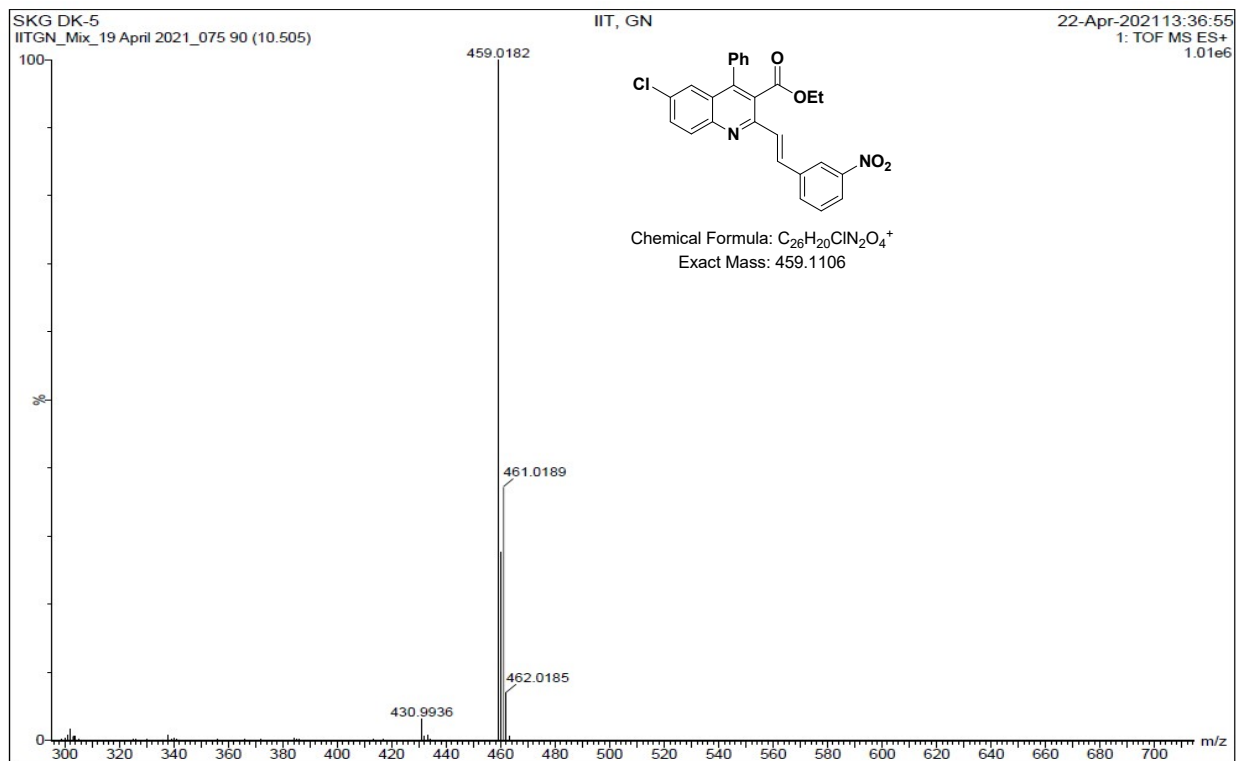

***Ethyl 6-chloro-2-(2-(furan-2-yl)vinyl)-4-phenylquinoline-3 carboxylate (5p):***

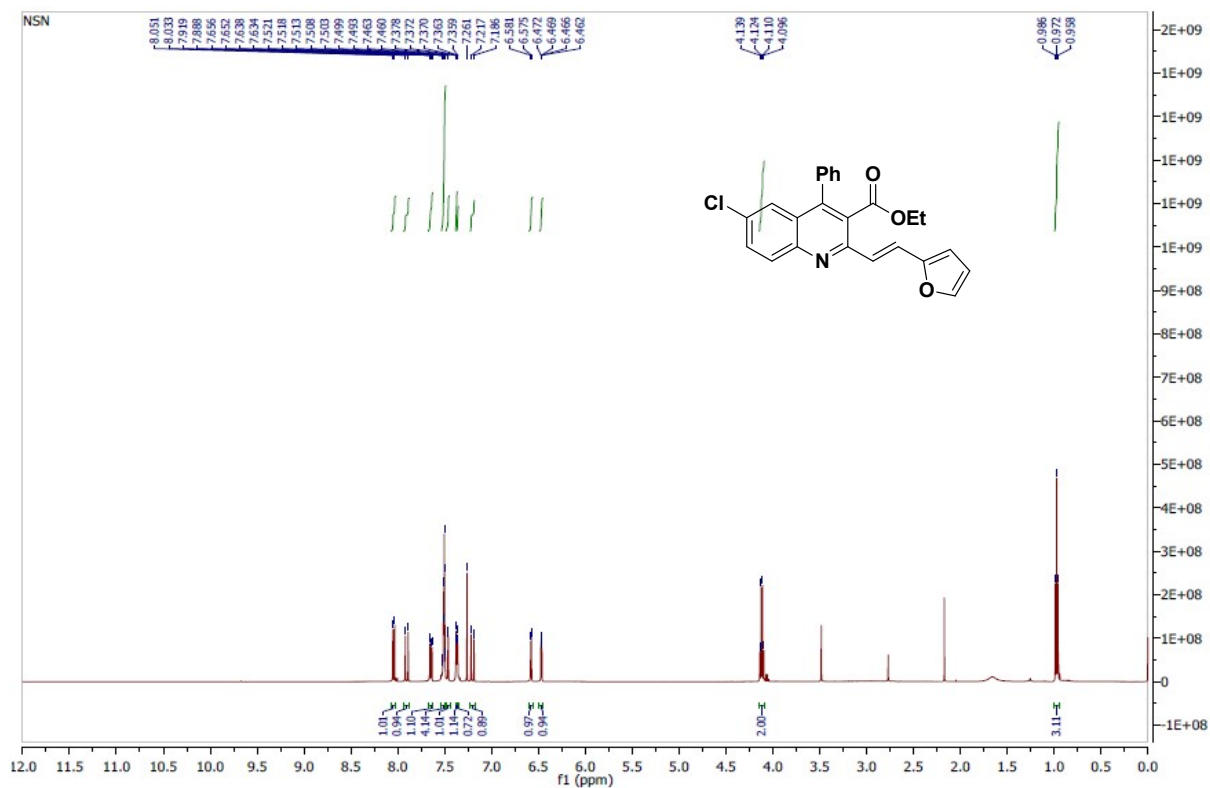

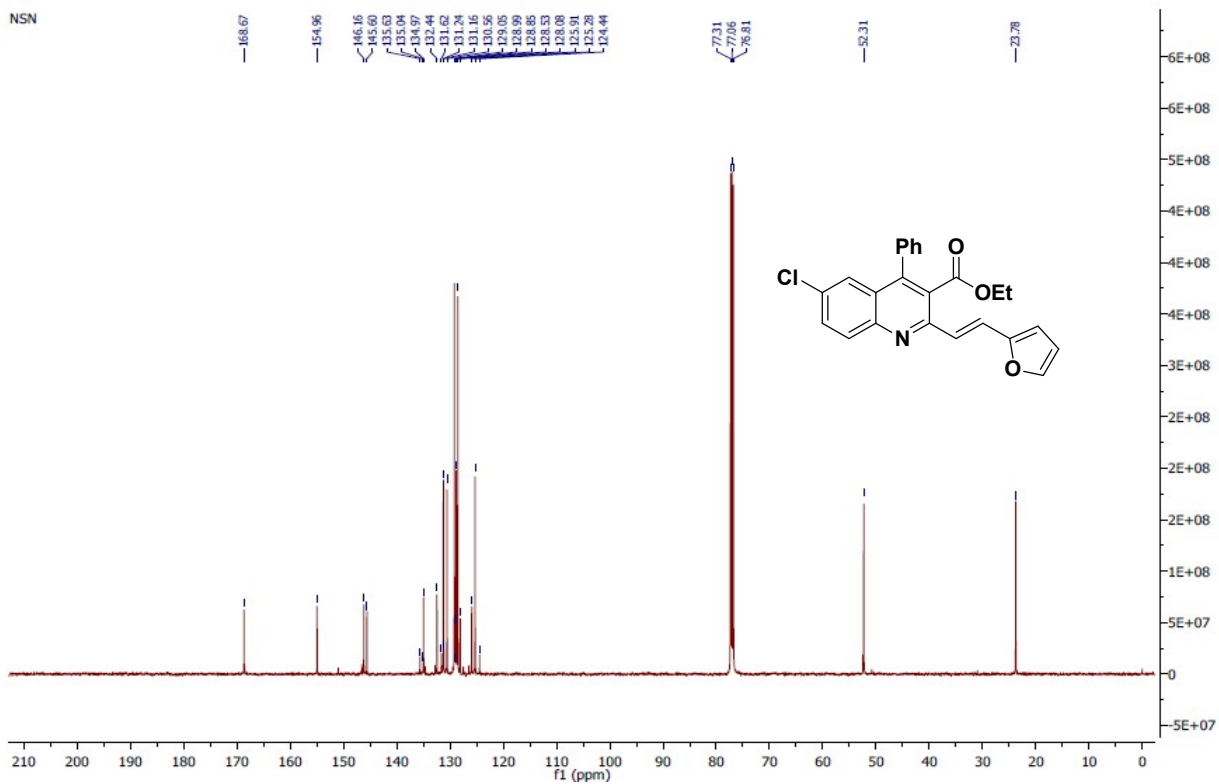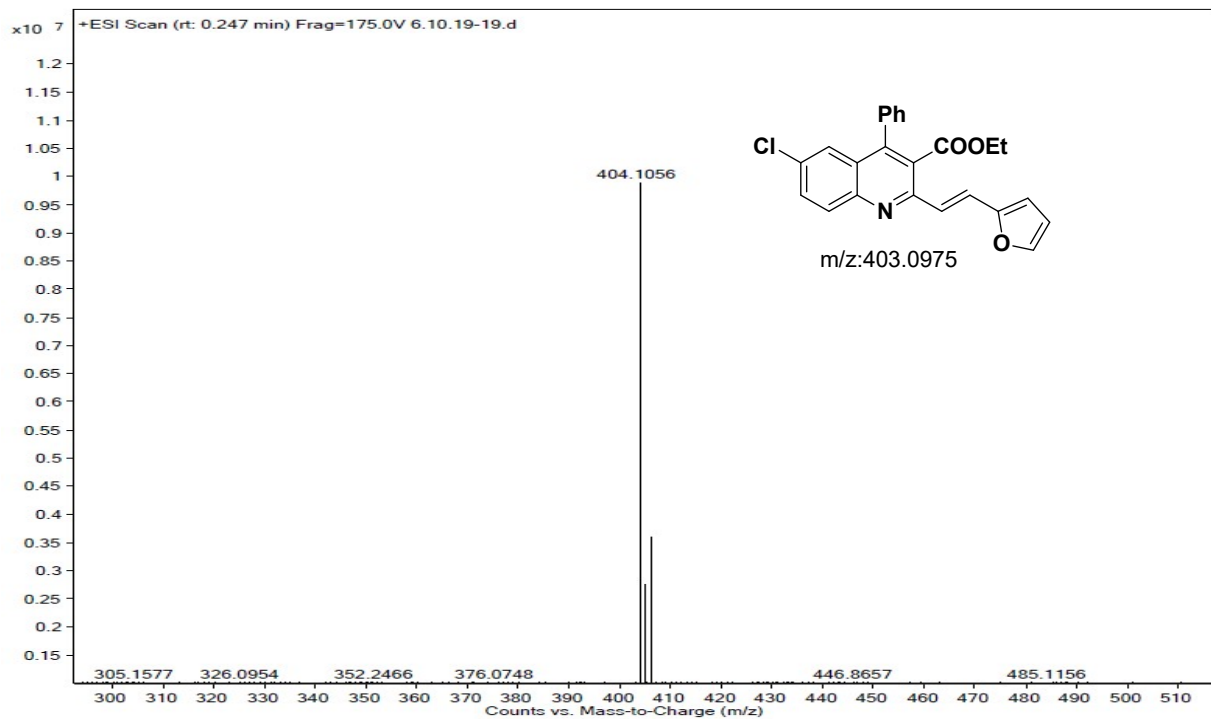

**(E)-Ethyl 4-phenyl-2-styrylquinoline-3-carboxylate (5q):**

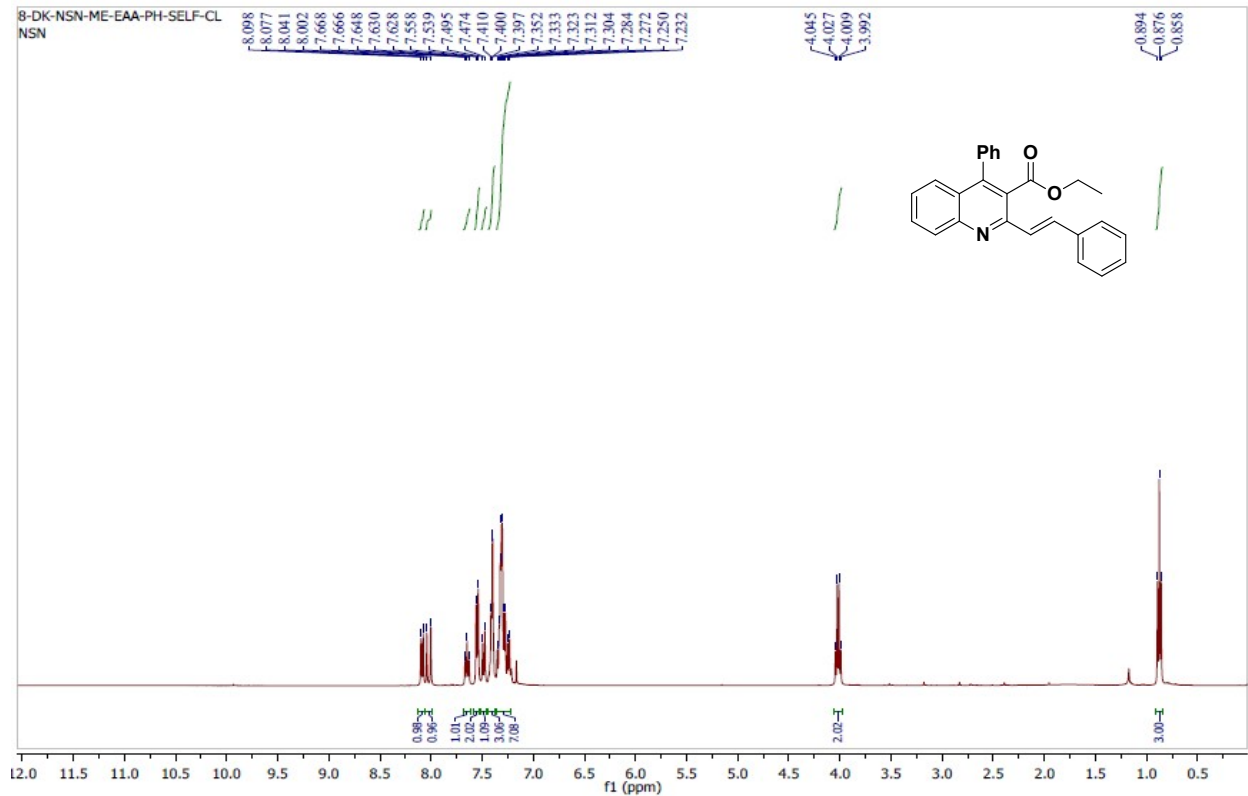

**(E)-Ethyl 2-(4-chlorostyryl)-6-nitro-4-phenylquinoline-3-carboxylate (5r):**

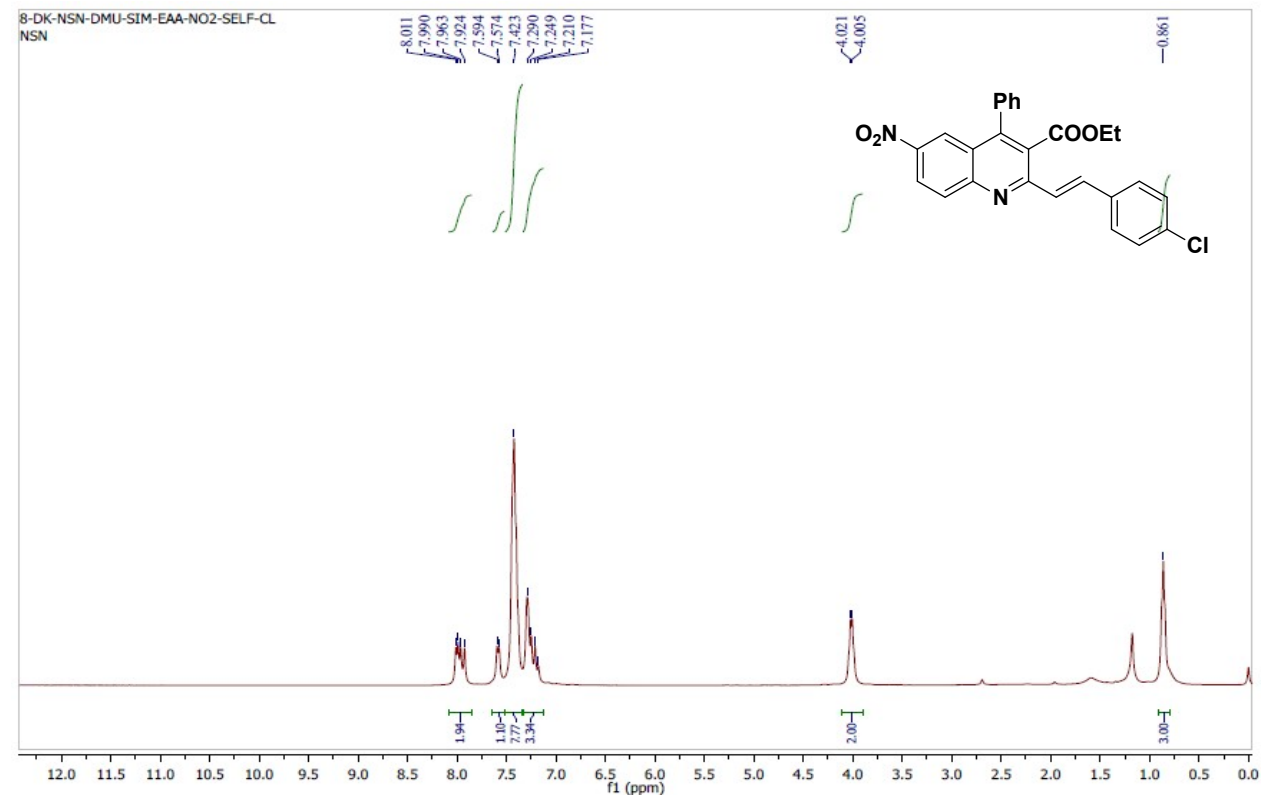

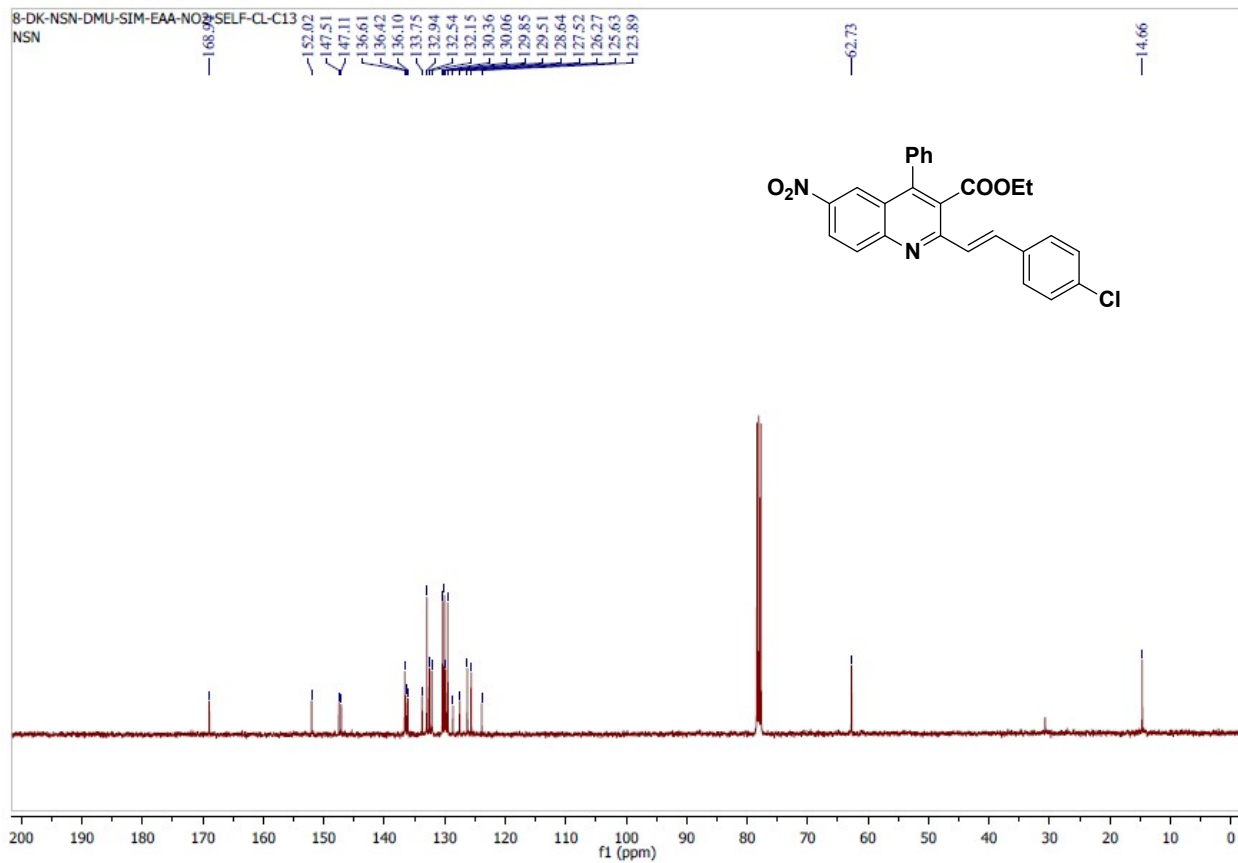

### Acquisition Parameter

|             |            |                      |          |                  |           |
|-------------|------------|----------------------|----------|------------------|-----------|
| Source Type | ESI        | Ion Polarity         | Positive | Set Nebulizer    | 0.3 Bar   |
| Focus       | Not active | Set Capillary        | 4500 V   | Set Dry Heater   | 180 °C    |
| Scan Begin  | 50 m/z     | Set End Plate Offset | -500 V   | Set Dry Gas      | 4.0 l/min |
| Scan End    | 2000 m/z   | Set Charging Voltage | 0 V      | Set Divert Valve | Waste     |
|             |            | Set Corona           | 0 nA     | Set APCI Heater  | 0 °C      |

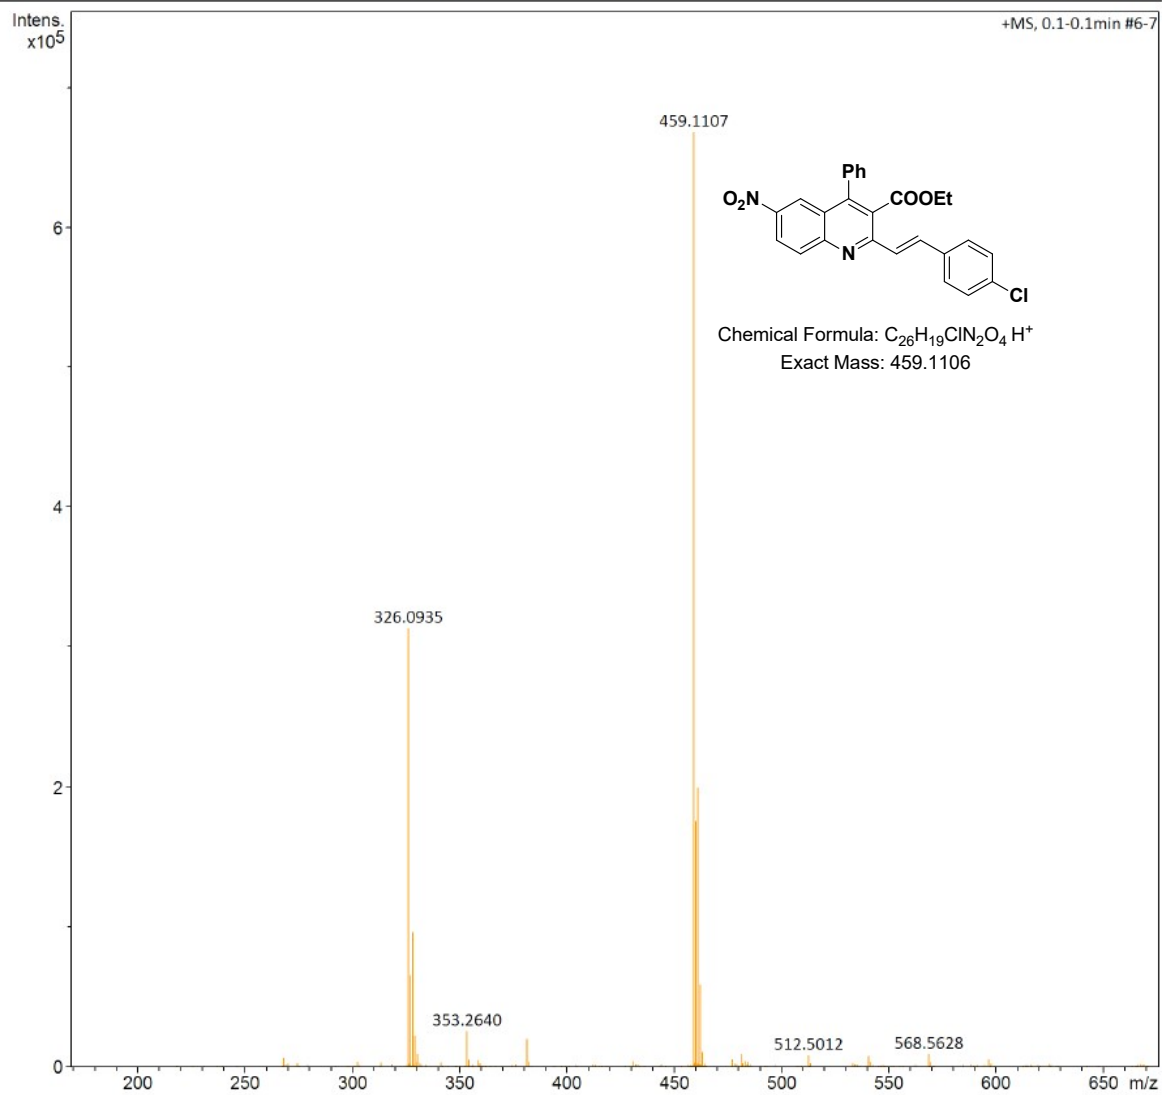

5R.d

Bruker Compass DataAnalysis 4.2

printed: 10/1/2021 3:40:55 PM

by: BDAL

Page 1 of 1

**6-Chloro-3-methyl-2-(4-methylstyryl)-4-phenylquinoline (6a):**

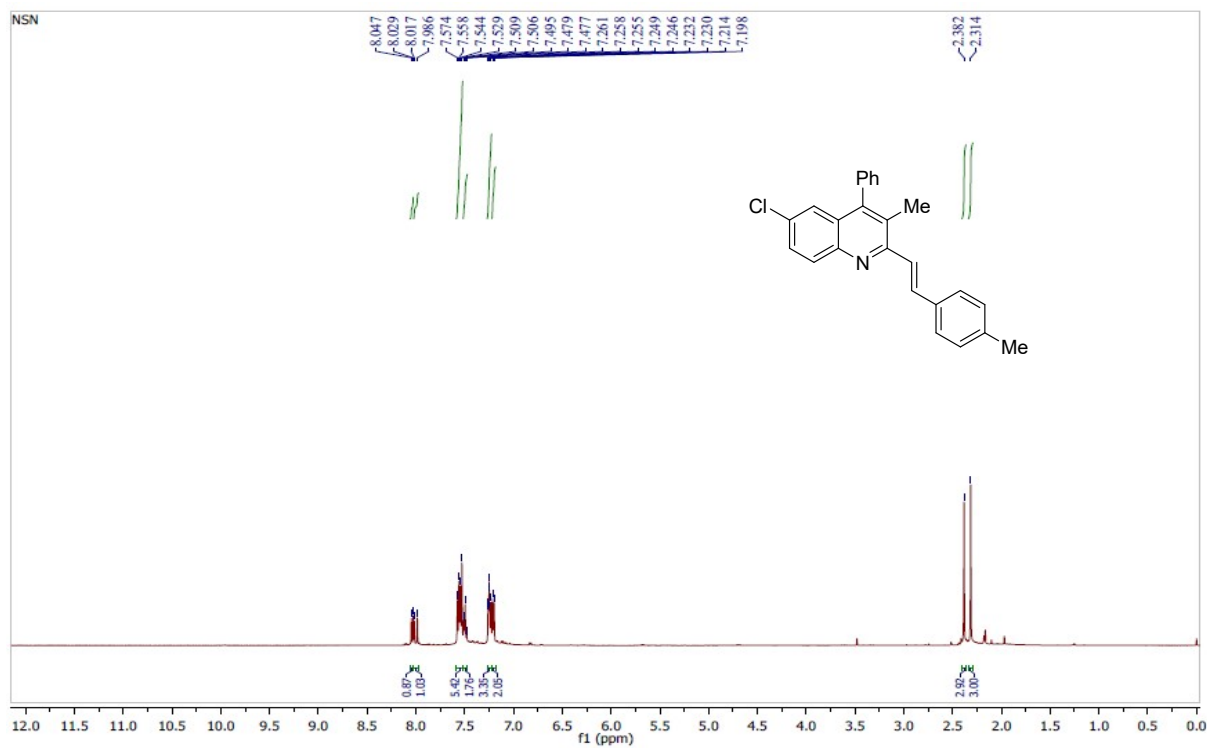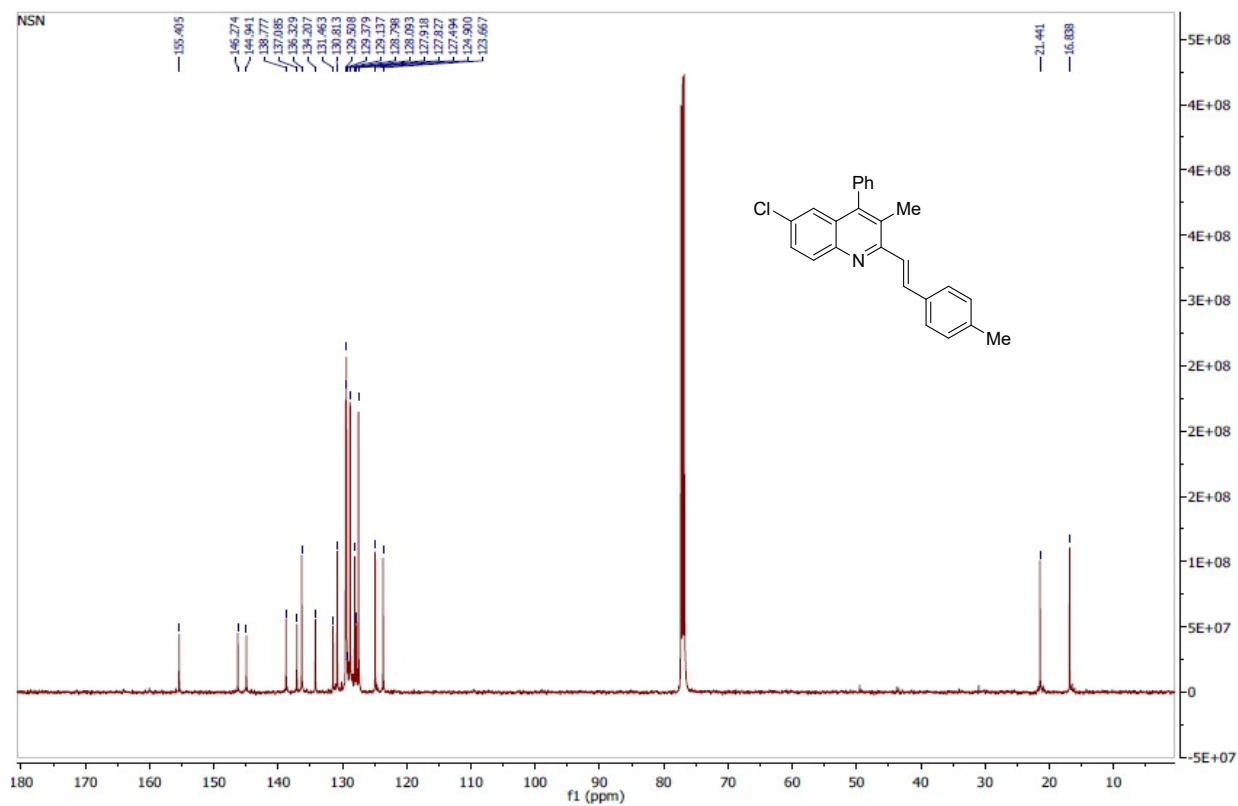

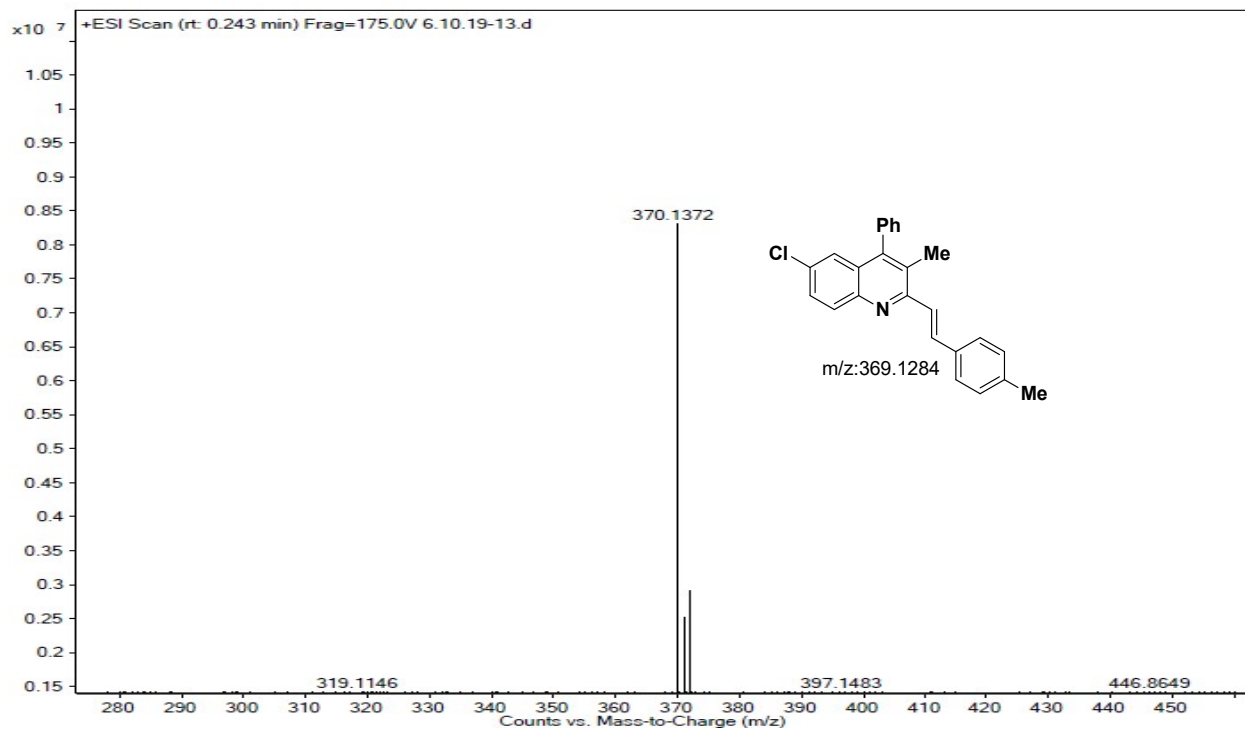

**6-Chloro-2-(4-methoxystyryl)-3-methyl-4-phenylquinoline (6b):**

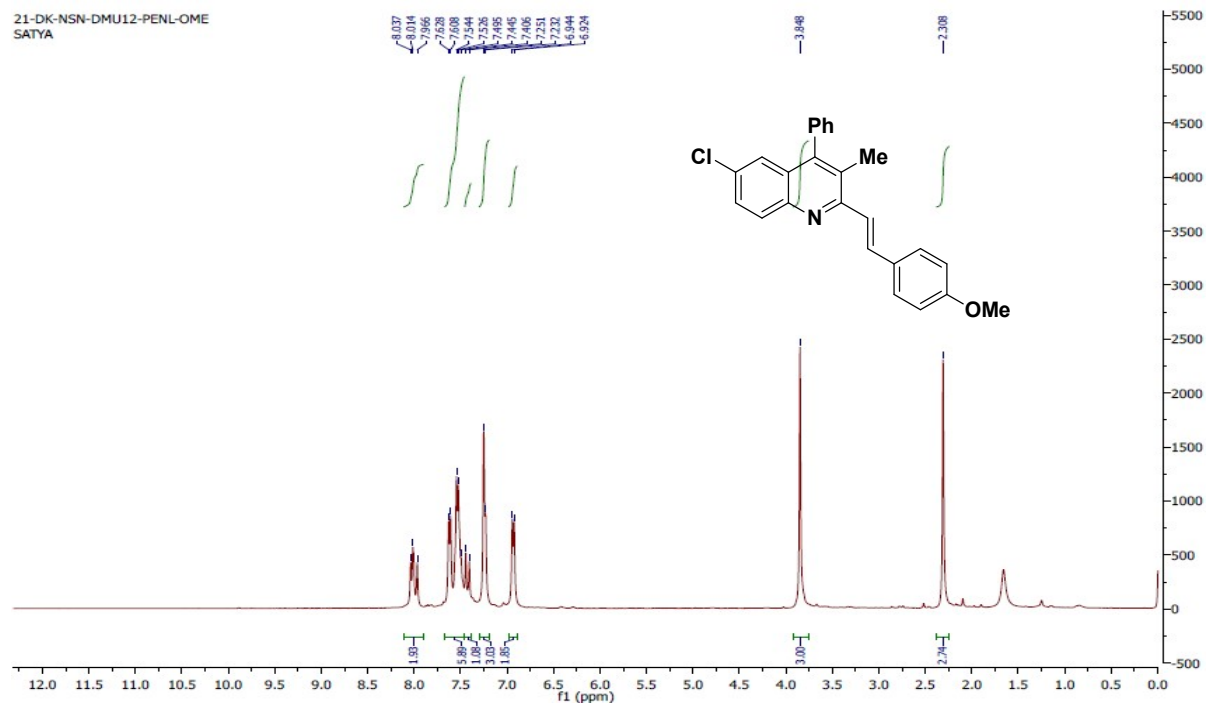



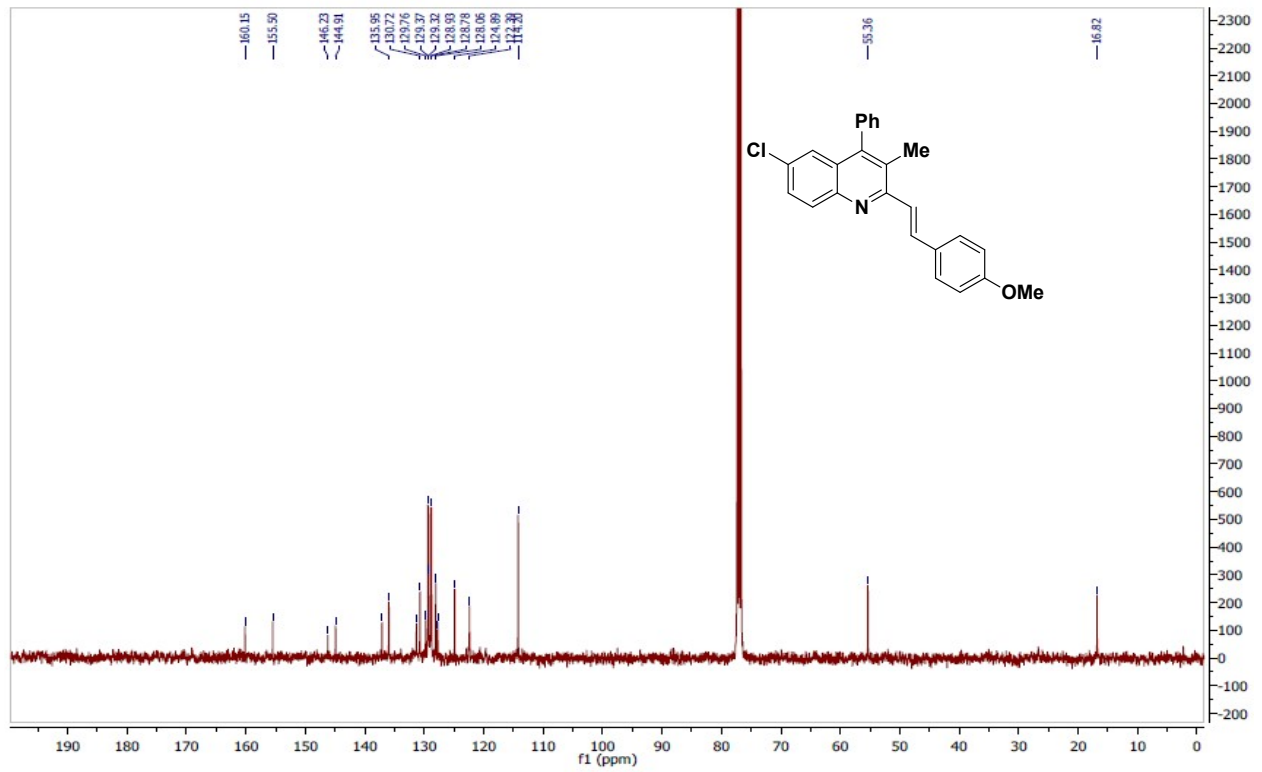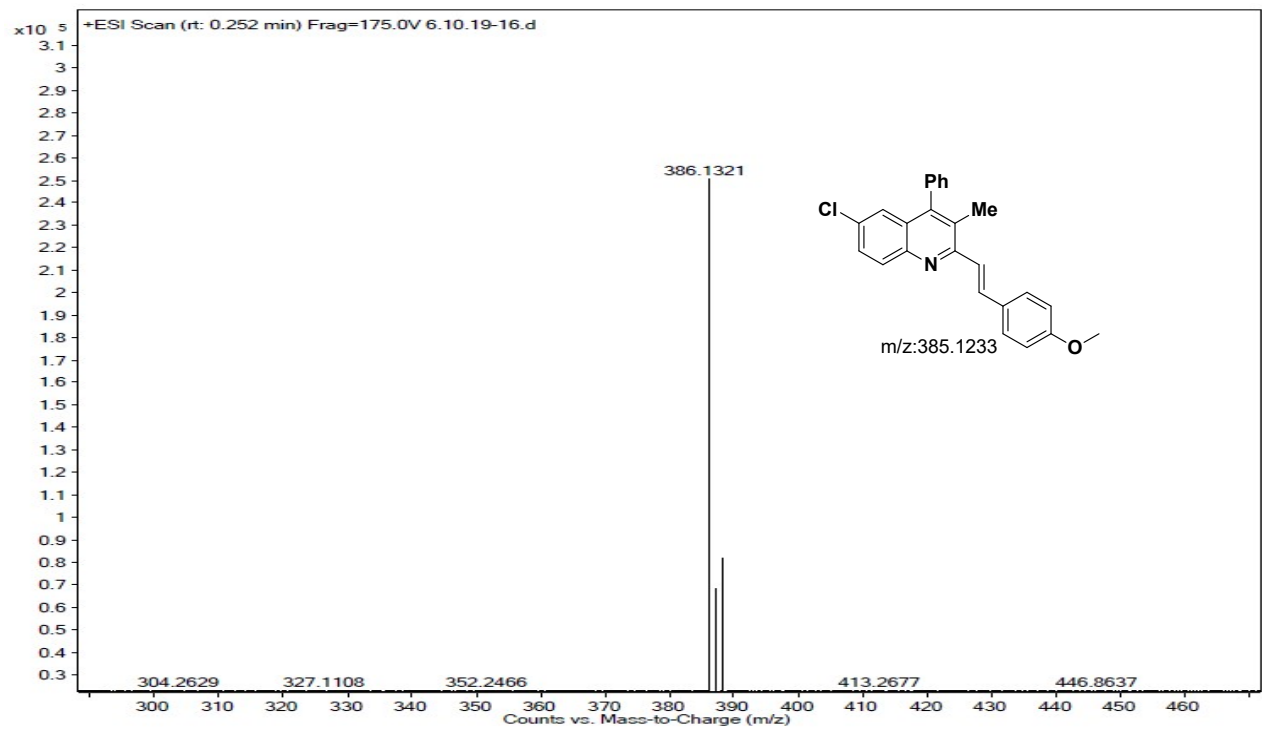

**6-Chloro-2-(4-chlorostyryl)-3-methyl-4-phenylquinoline (6c):**

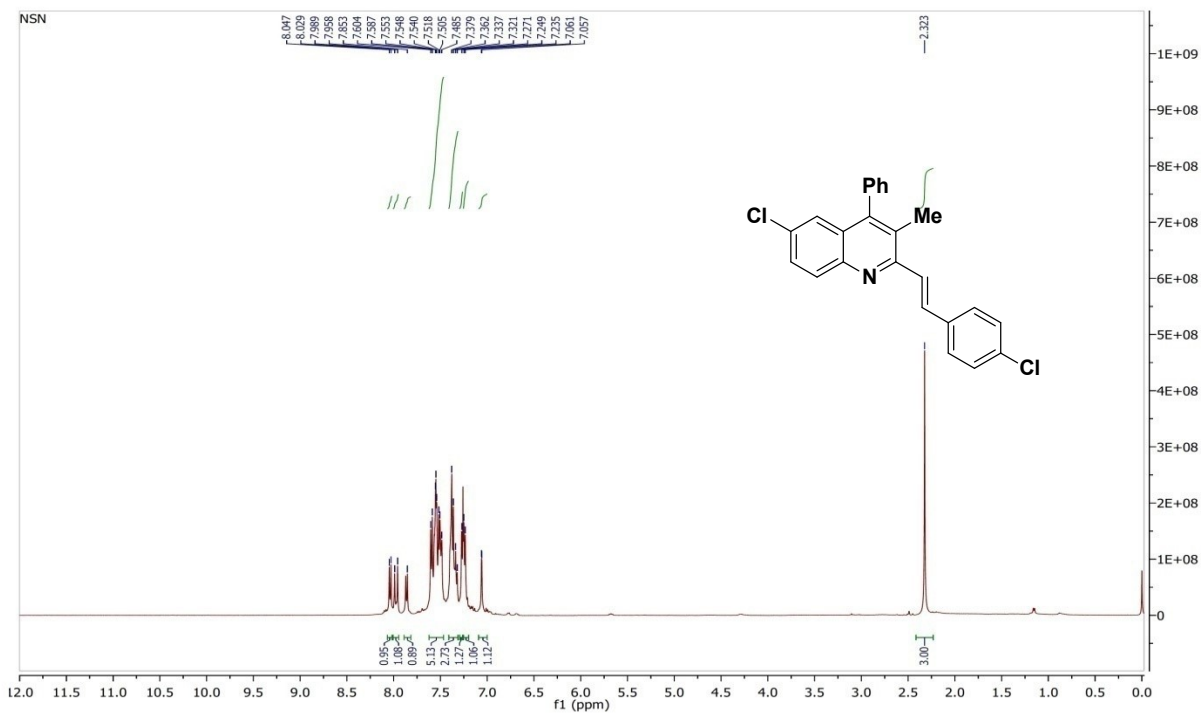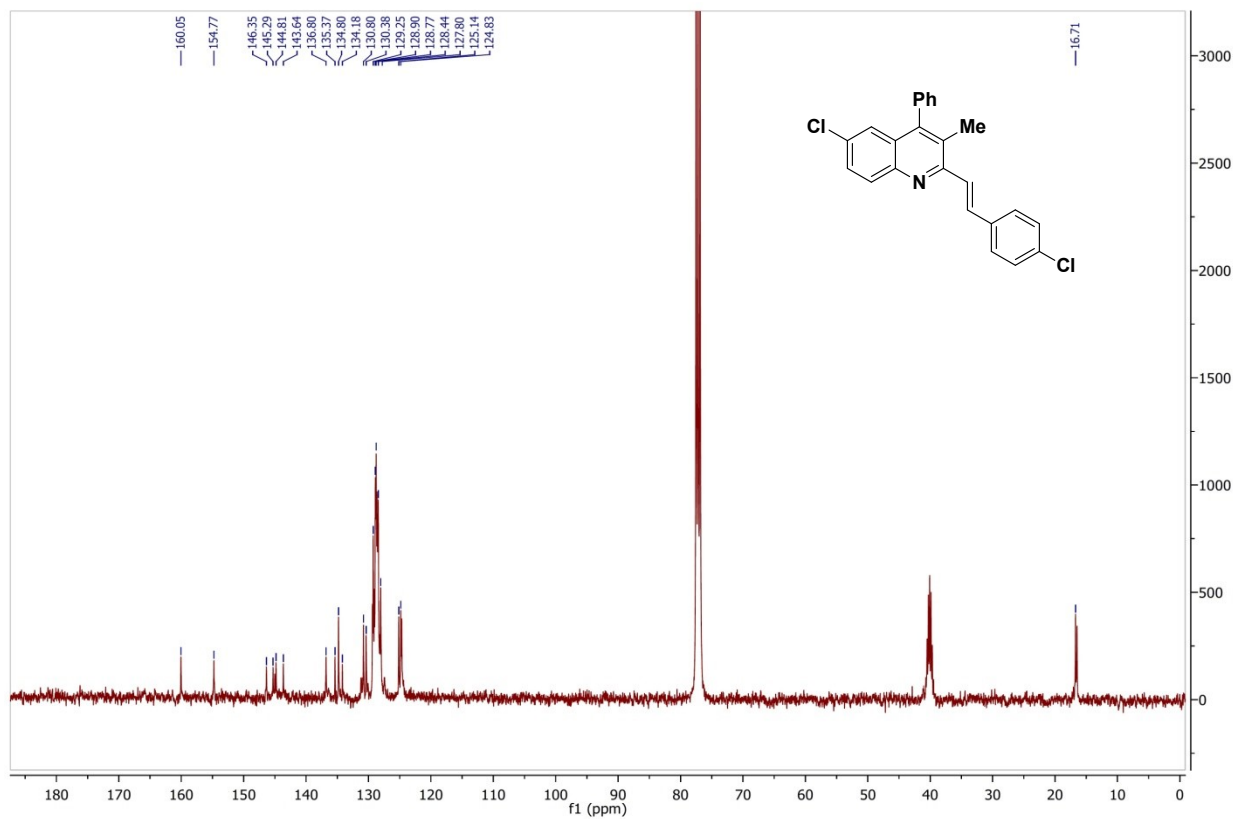

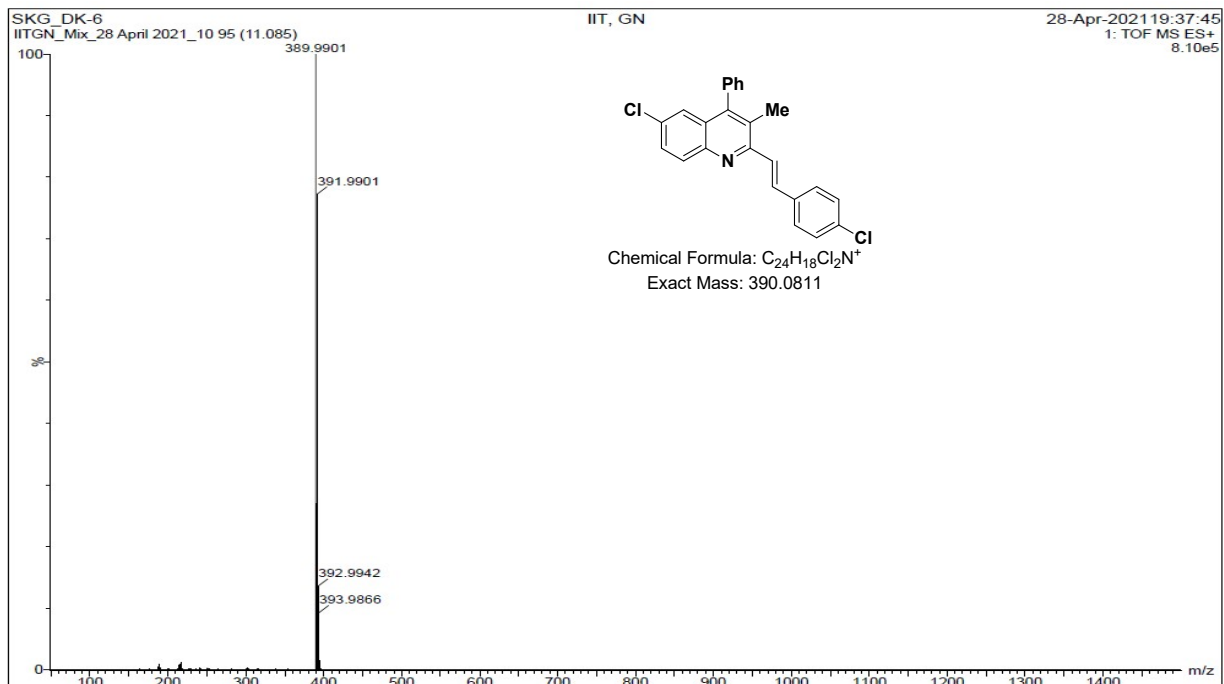

**6-Chloro-3-methyl-2-(4-nitrostyryl)-4-phenylquinoline (6d):**

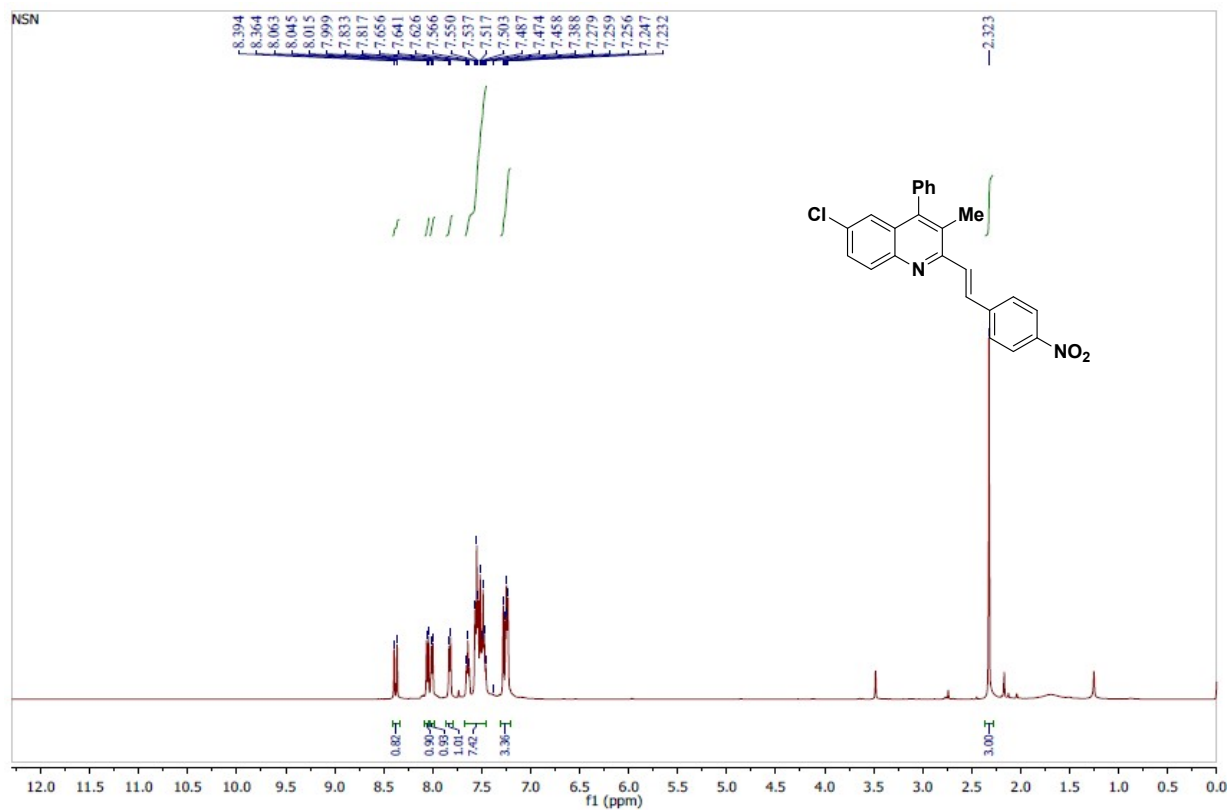

NSN

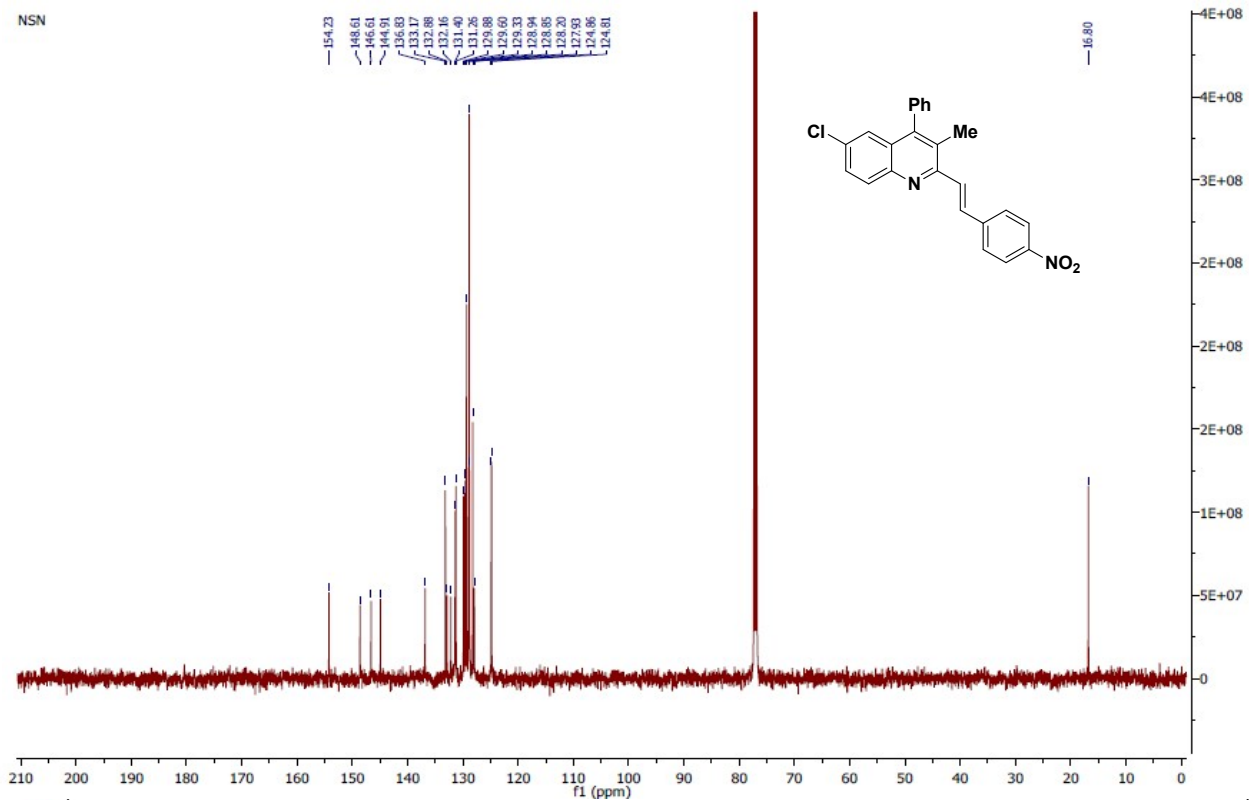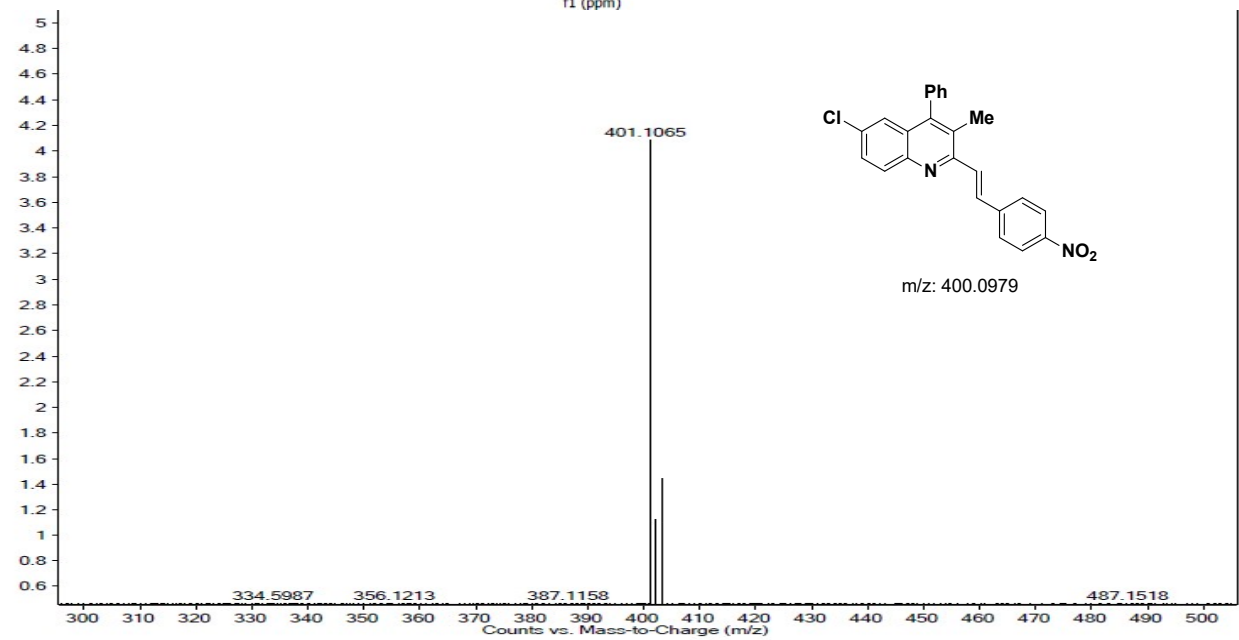

**(E)-2-(2-(6-Chloro-3-methyl-4-phenylquinolin-2-yl)vinyl)-6-ethoxyphenol (6e):**

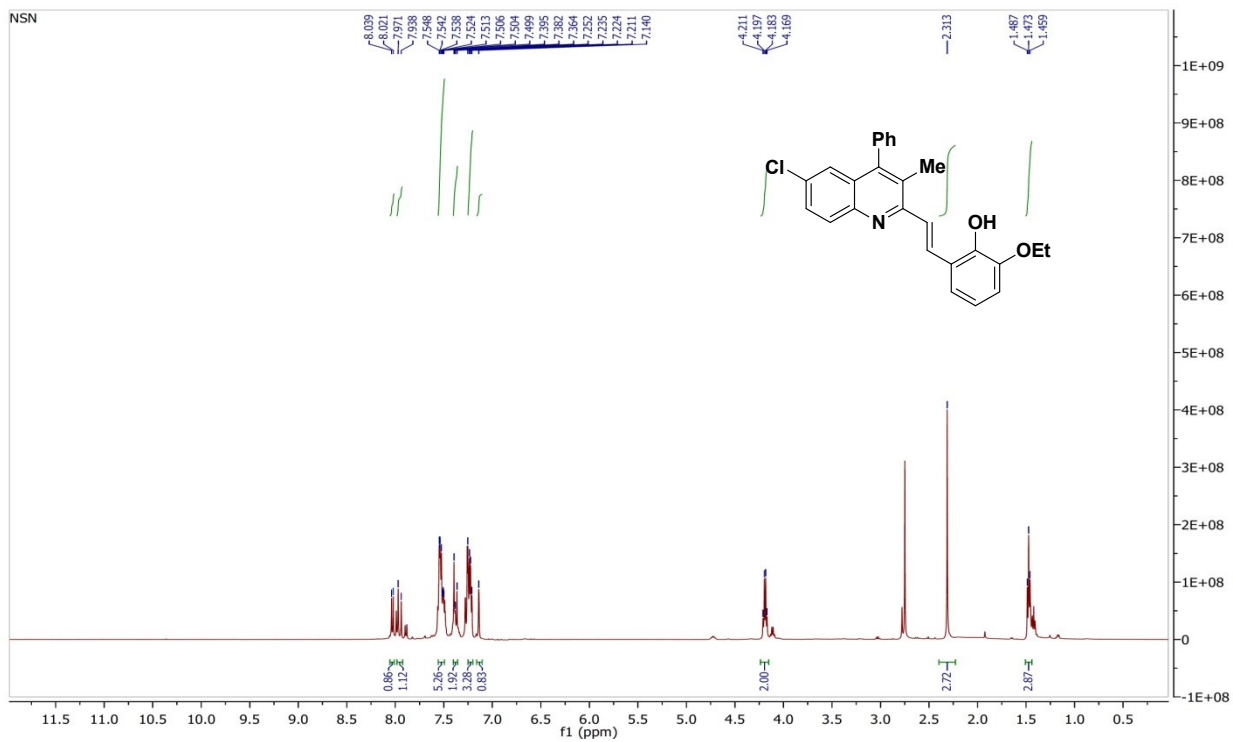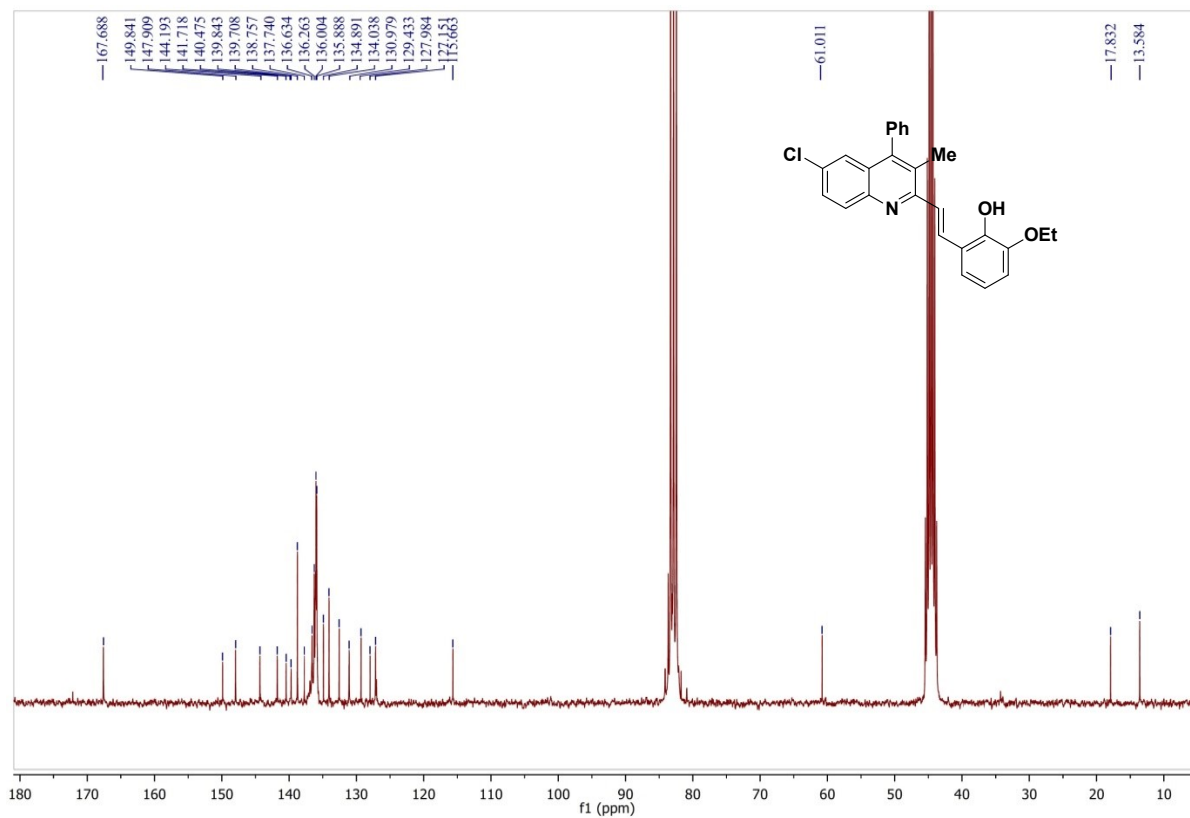

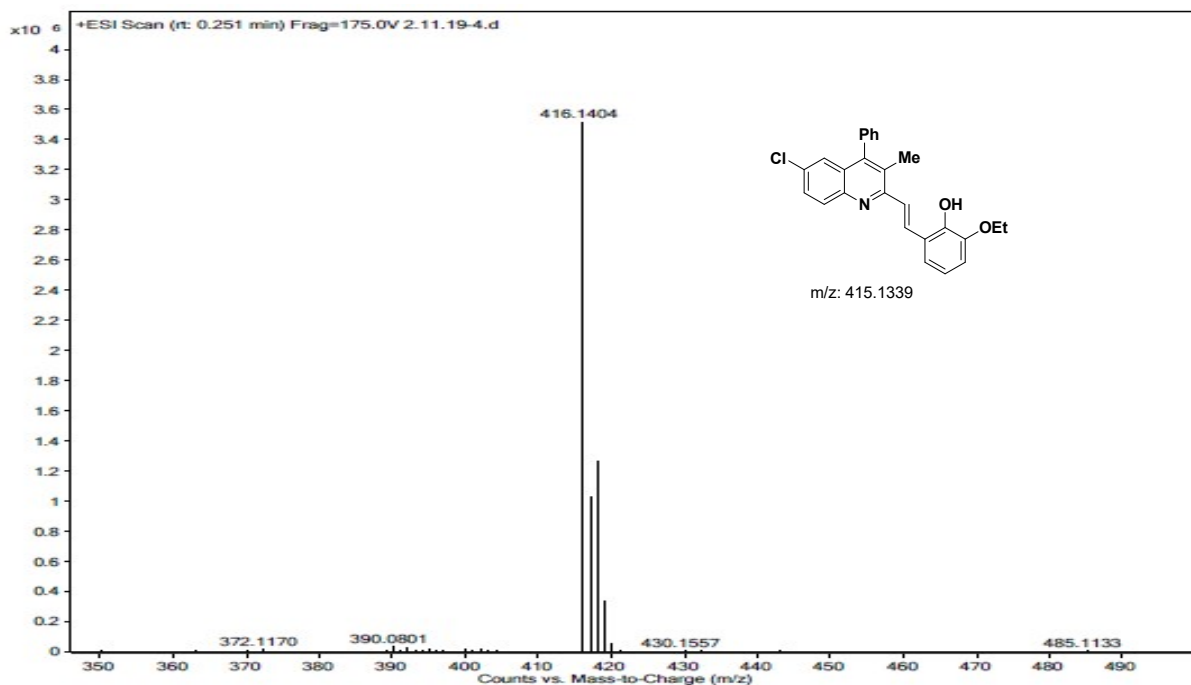

**6-Chloro-2-(3,4-dimethoxystyryl)-3-methyl-4-phenylquinoline (6f):**

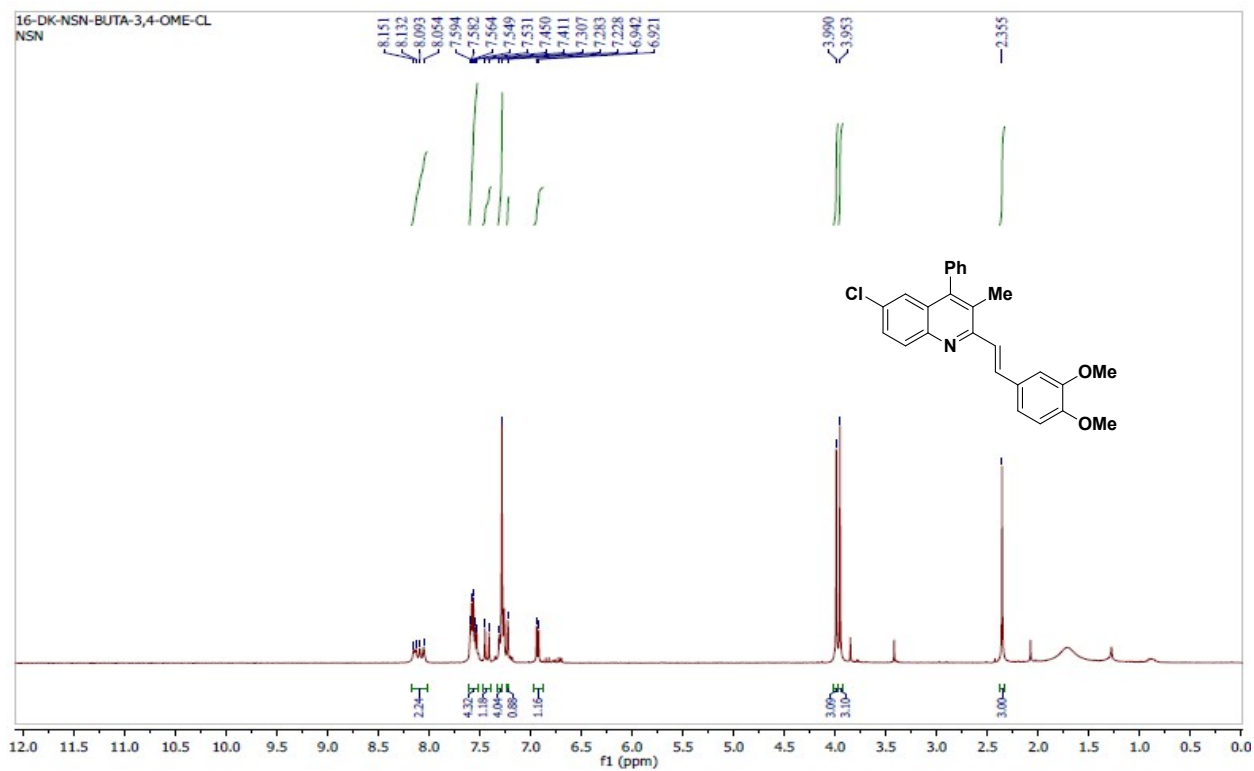

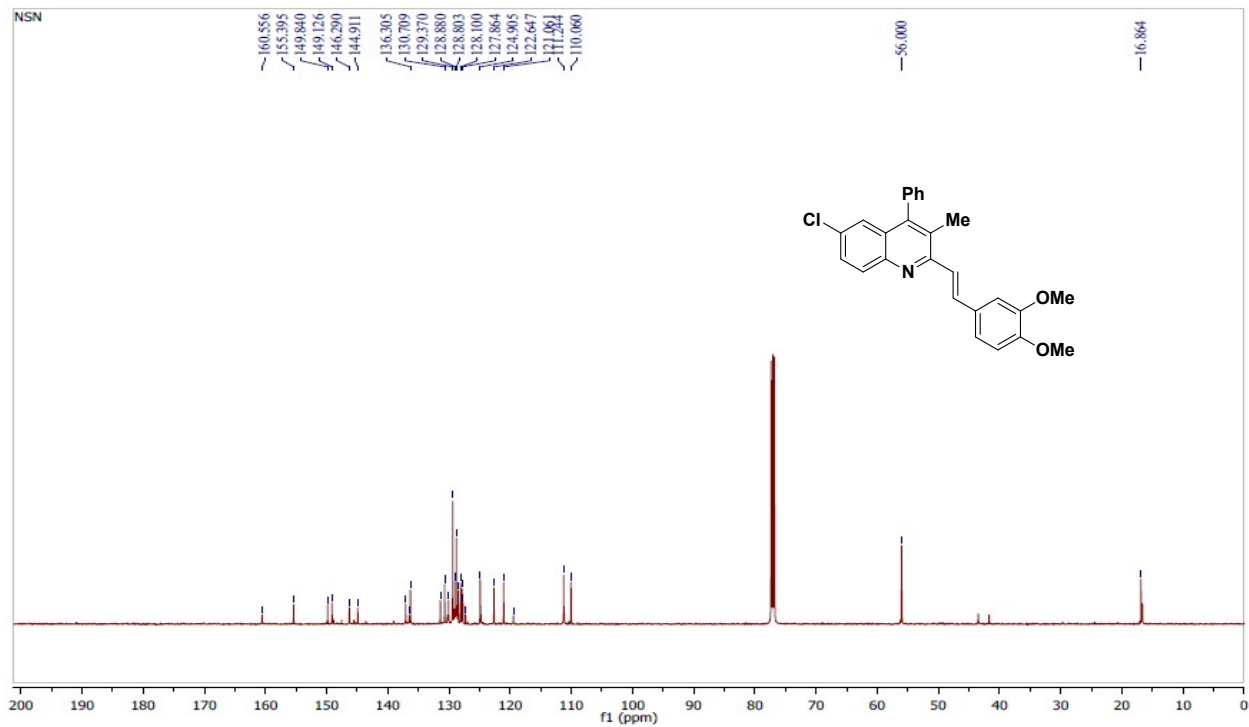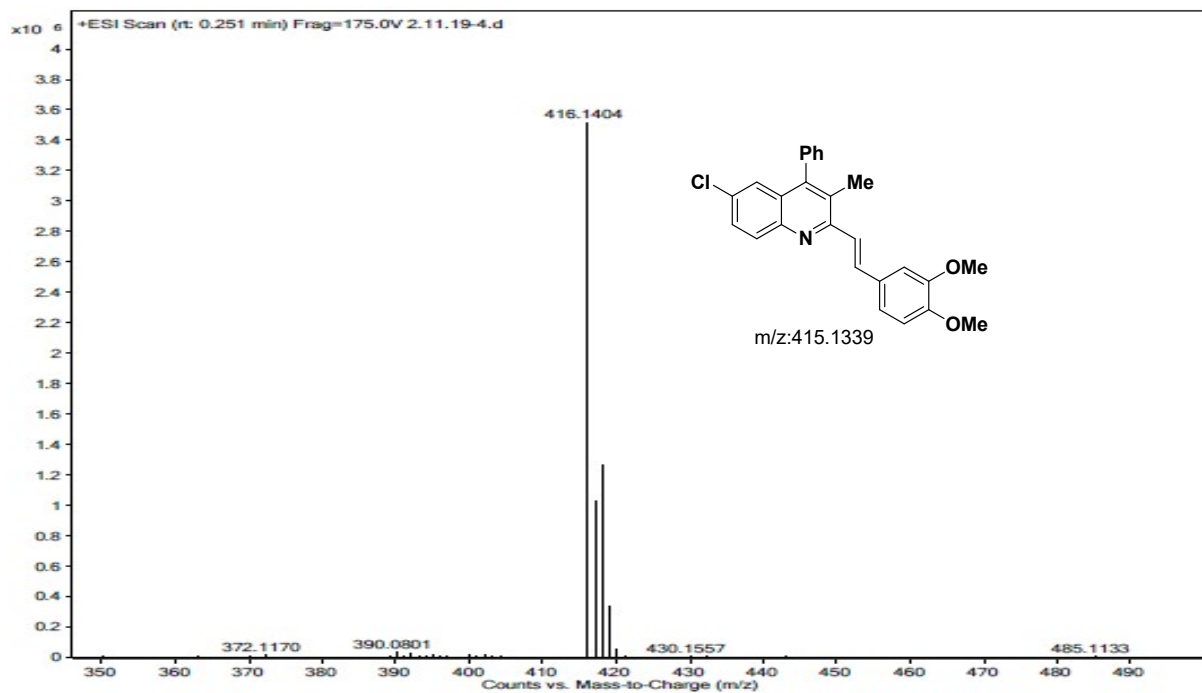

**3-(2-(6-Chloro-3-methyl-4-phenylquinolin-2-yl) vinyl)-2-hydroxy-4H-chromen-4-one (6g):**

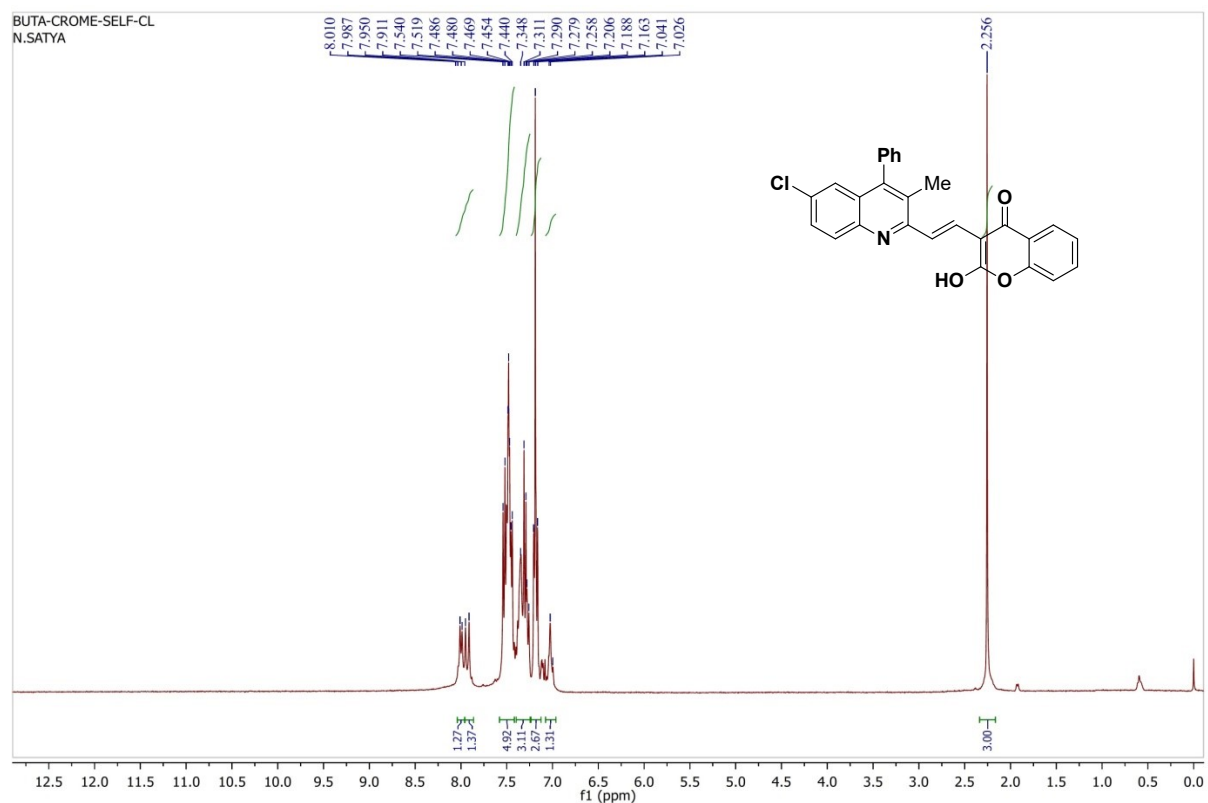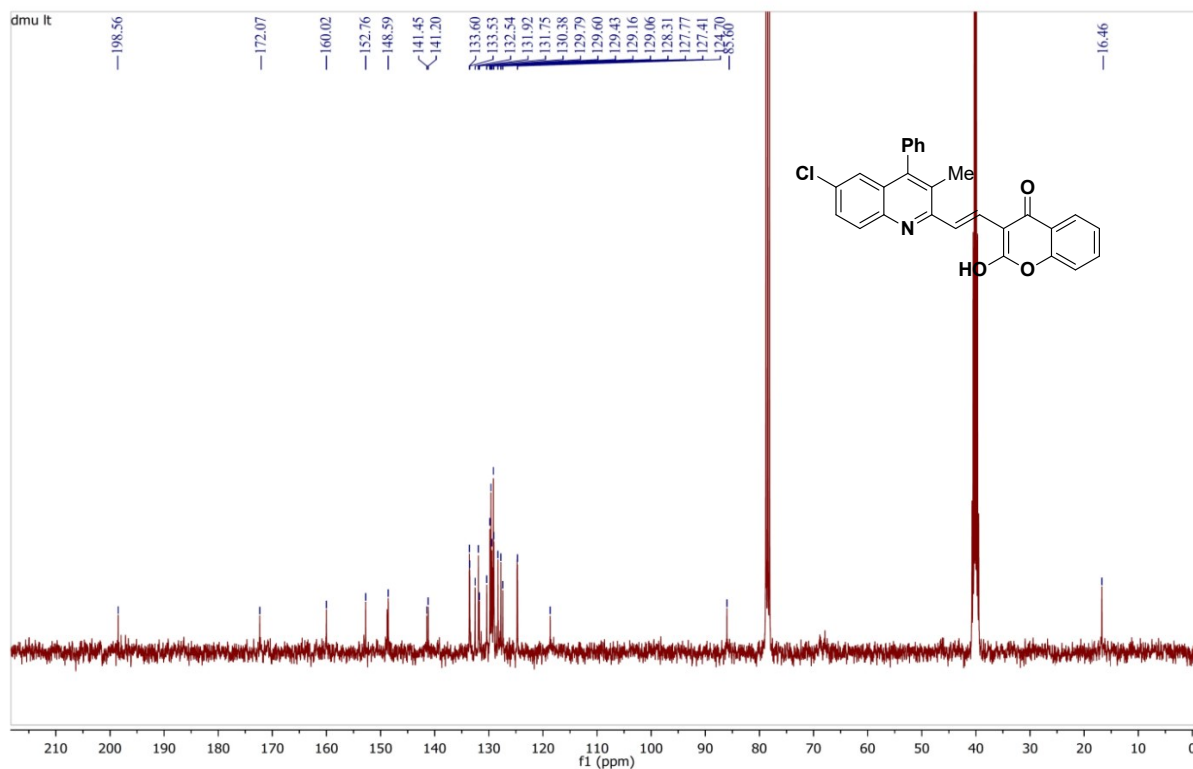



**Acquisition Parameter**

|             |            |                      |          |                  |           |
|-------------|------------|----------------------|----------|------------------|-----------|
| Source Type | ESI        | Ion Polarity         | Positive | Set Nebulizer    | 0.3 Bar   |
| Focus       | Not active | Set Capillary        | 4500 V   | Set Dry Heater   | 180 °C    |
| Scan Begin  | 50 m/z     | Set End Plate Offset | -500 V   | Set Dry Gas      | 4.0 l/min |
| Scan End    | 2000 m/z   | Set Charging Voltage | 0 V      | Set Divert Valve | Waste     |
|             |            | Set Corona           | 0 nA     | Set APCI Heater  | 0 °C      |

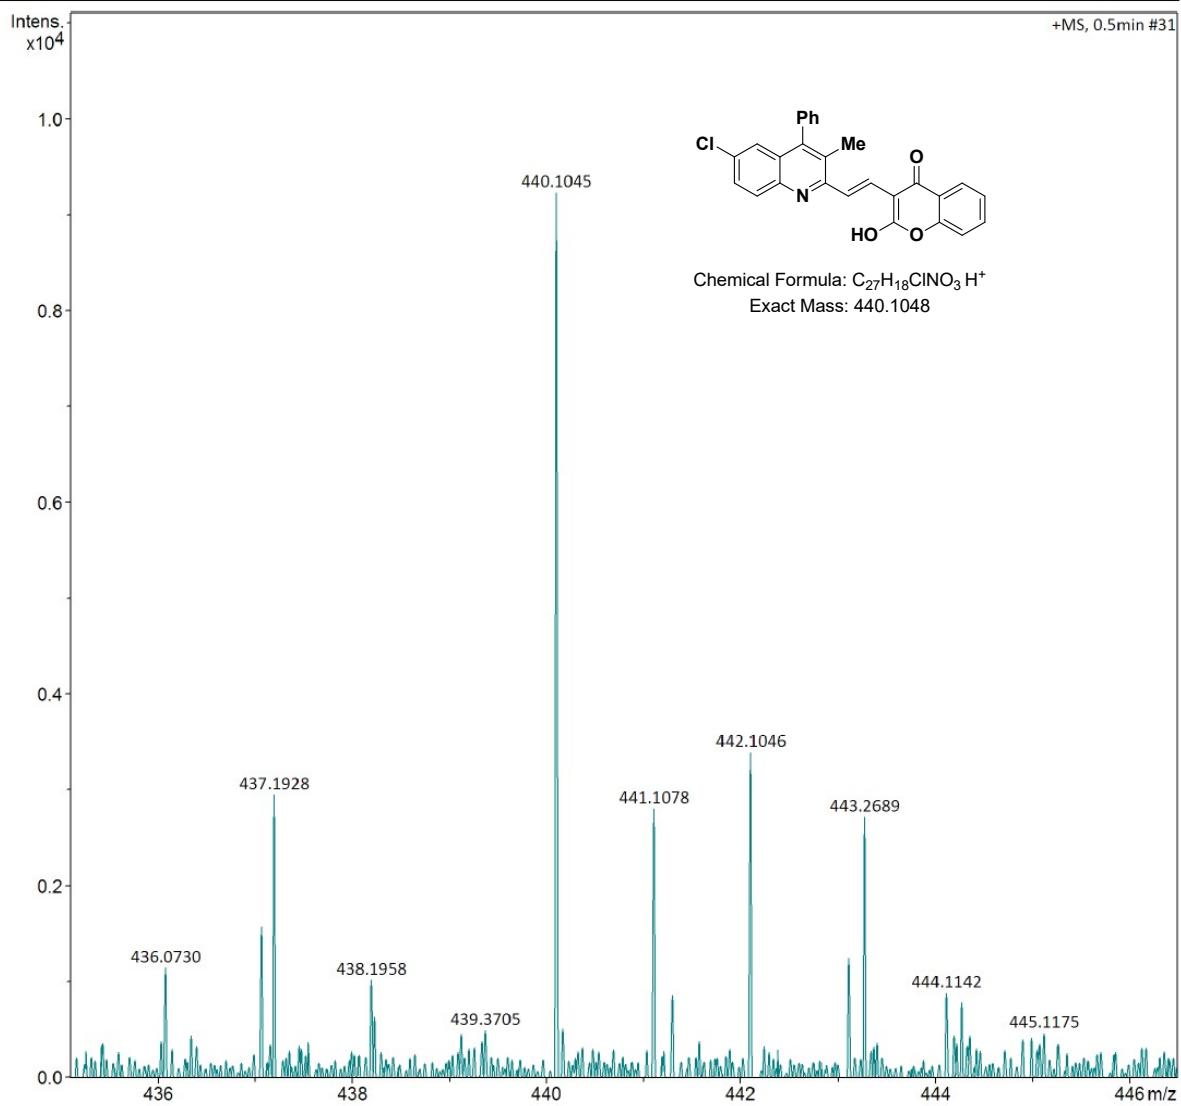

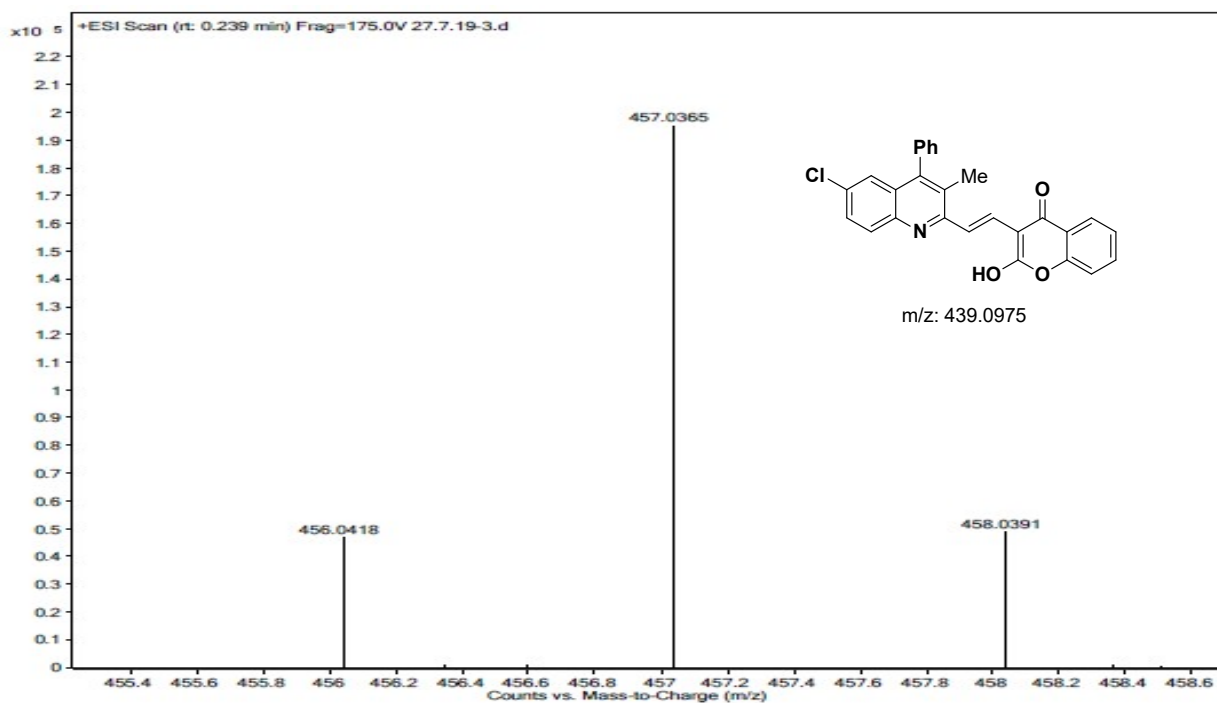

**2-(2-(1H-Indol-3-yl)vinyl)-6-chloro-3-methyl-4-phenylquinoline (6h):**

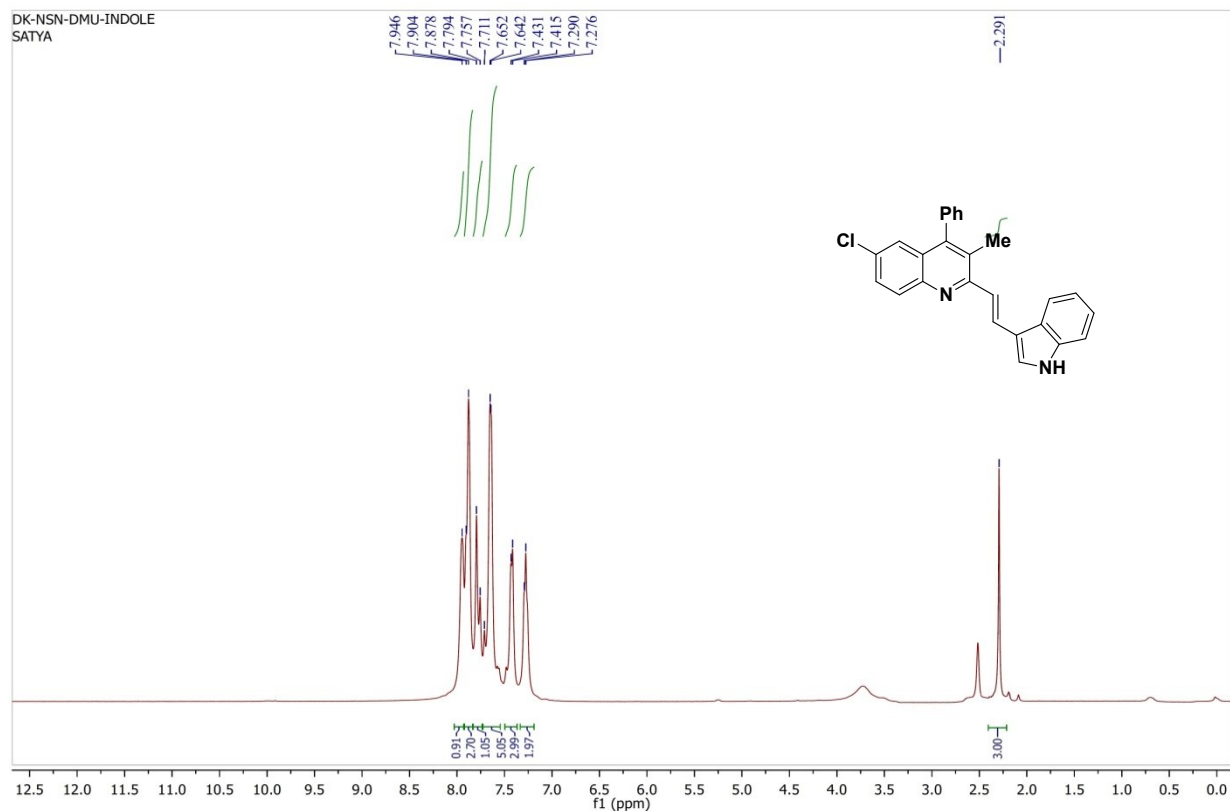

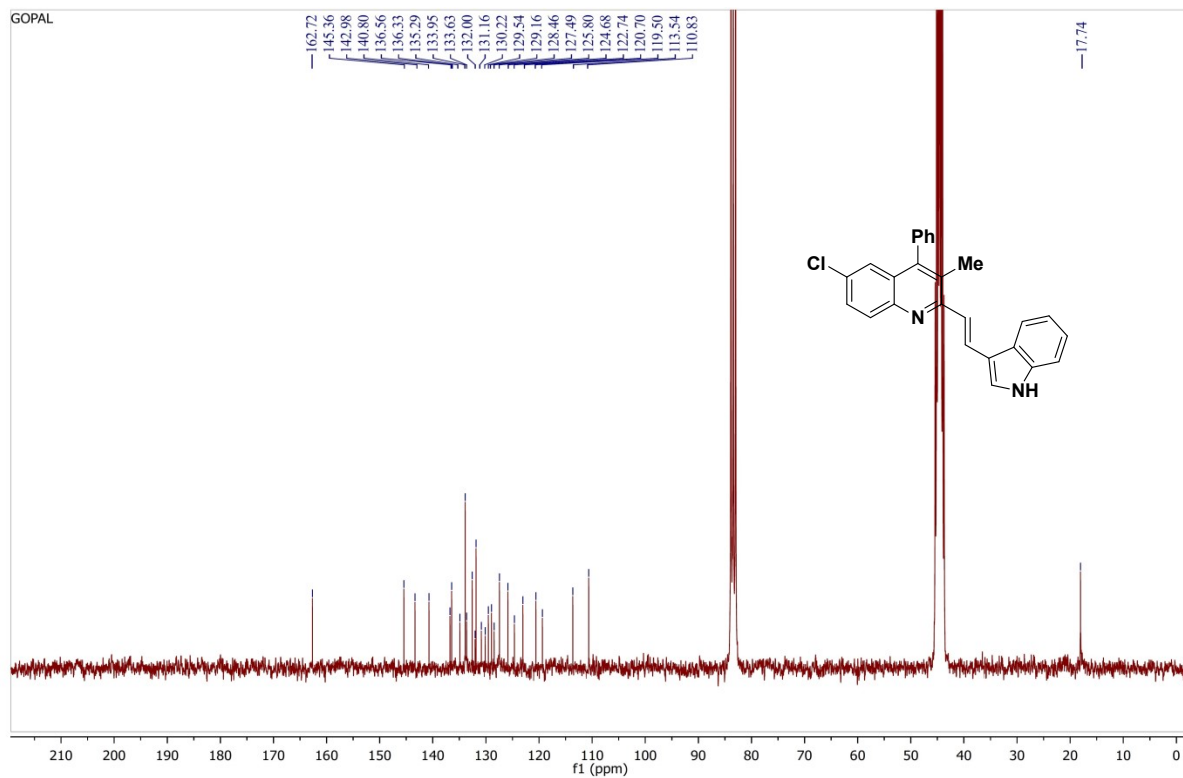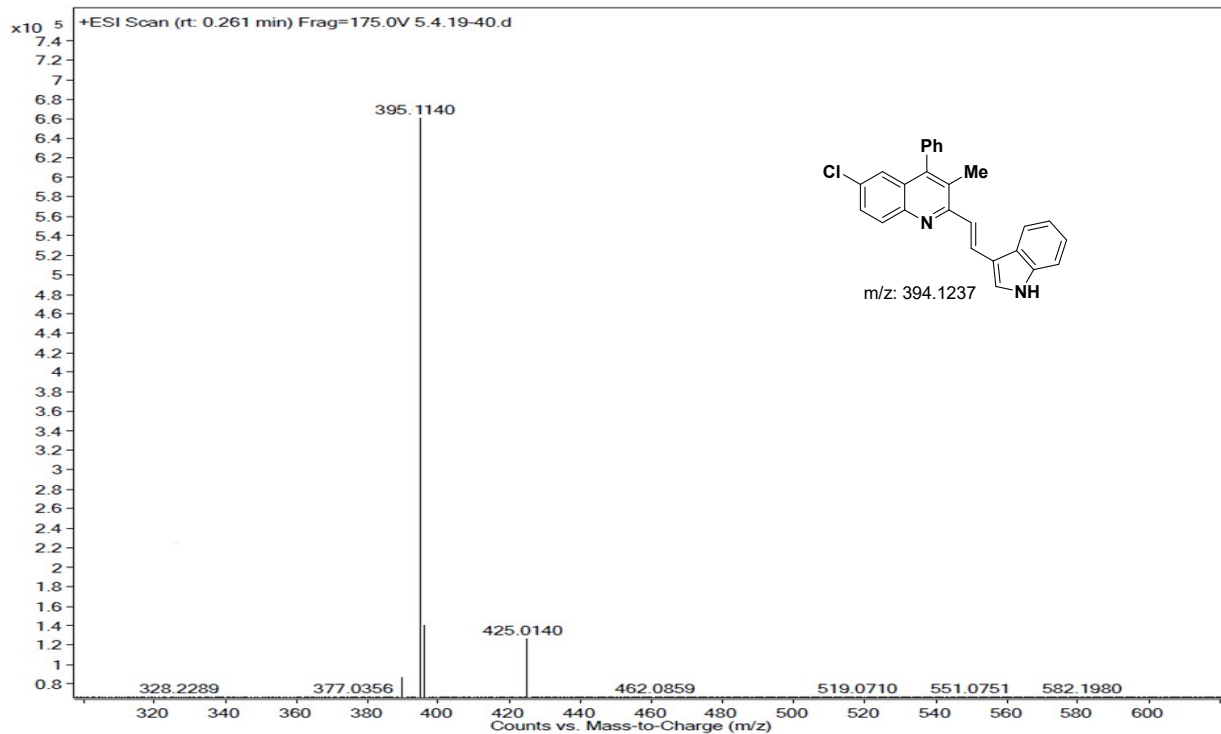

**7-Chloro-3-(4-methylbenzylidene)-9-phenyl-2,3-dihydro-1H-cyclopenta[b]quinolone(7a):**

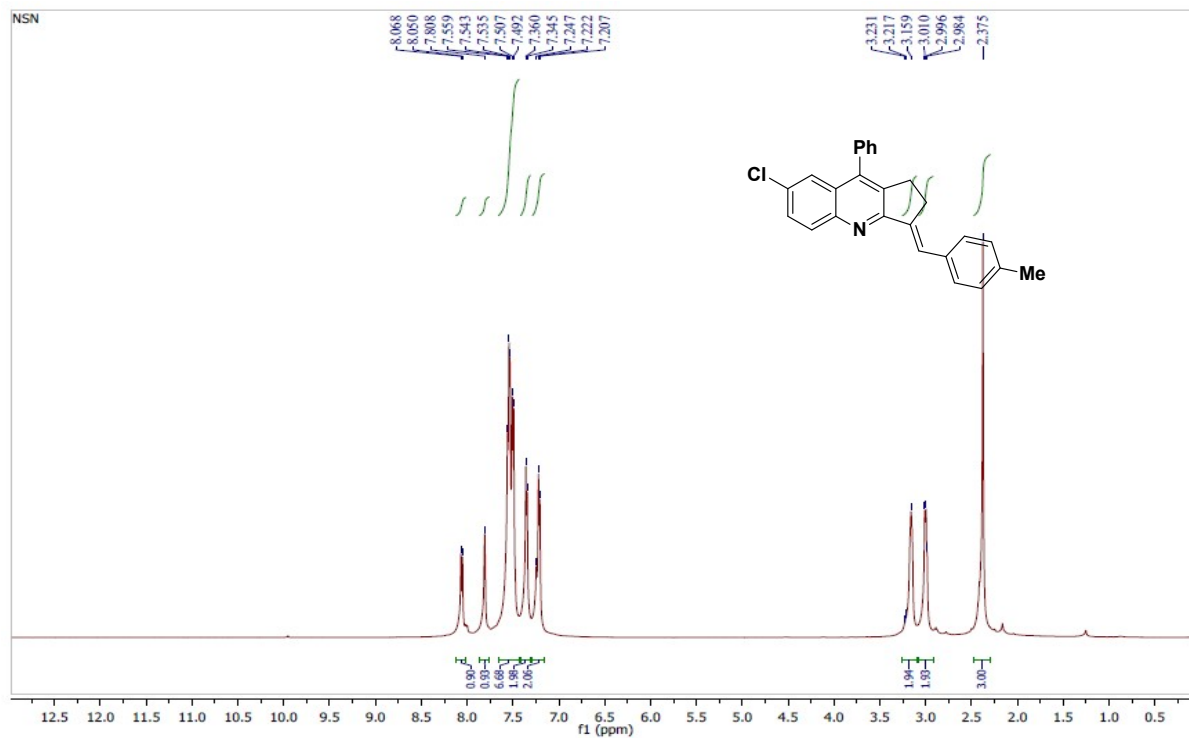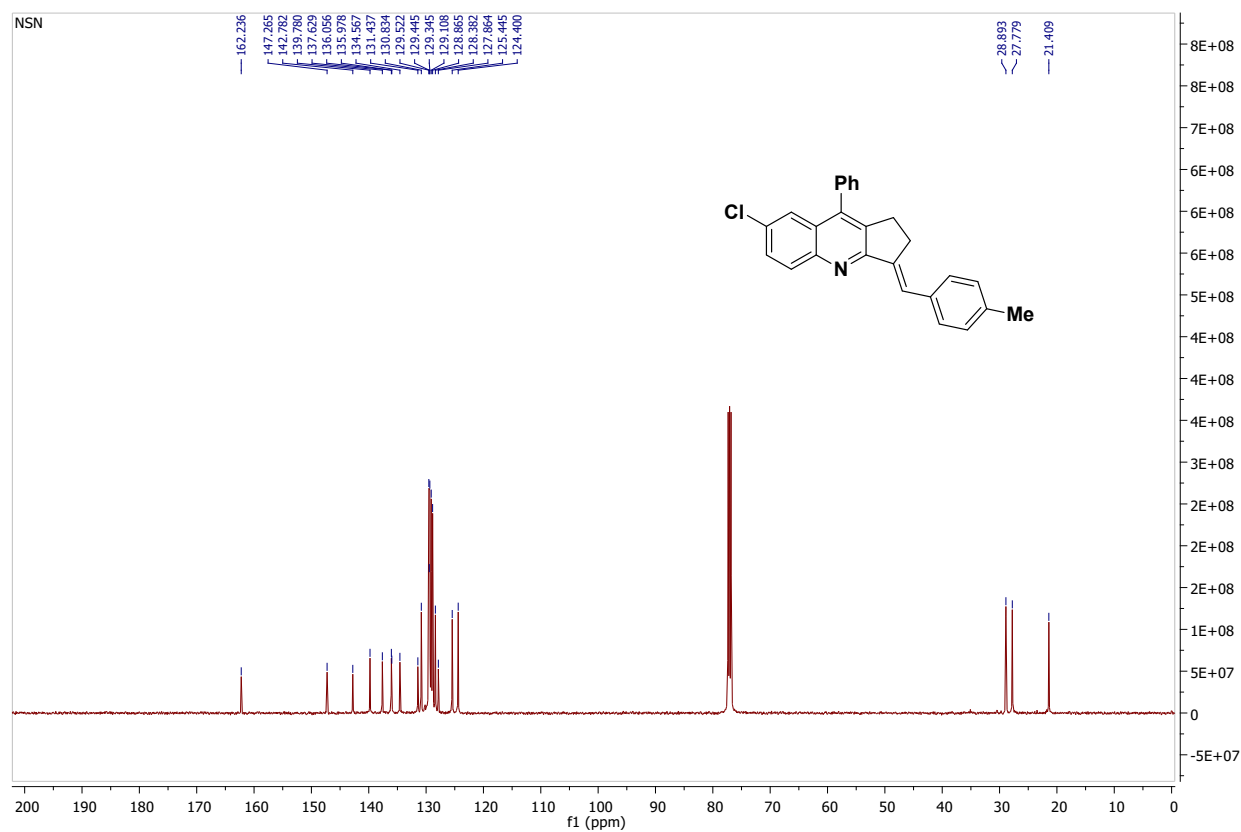

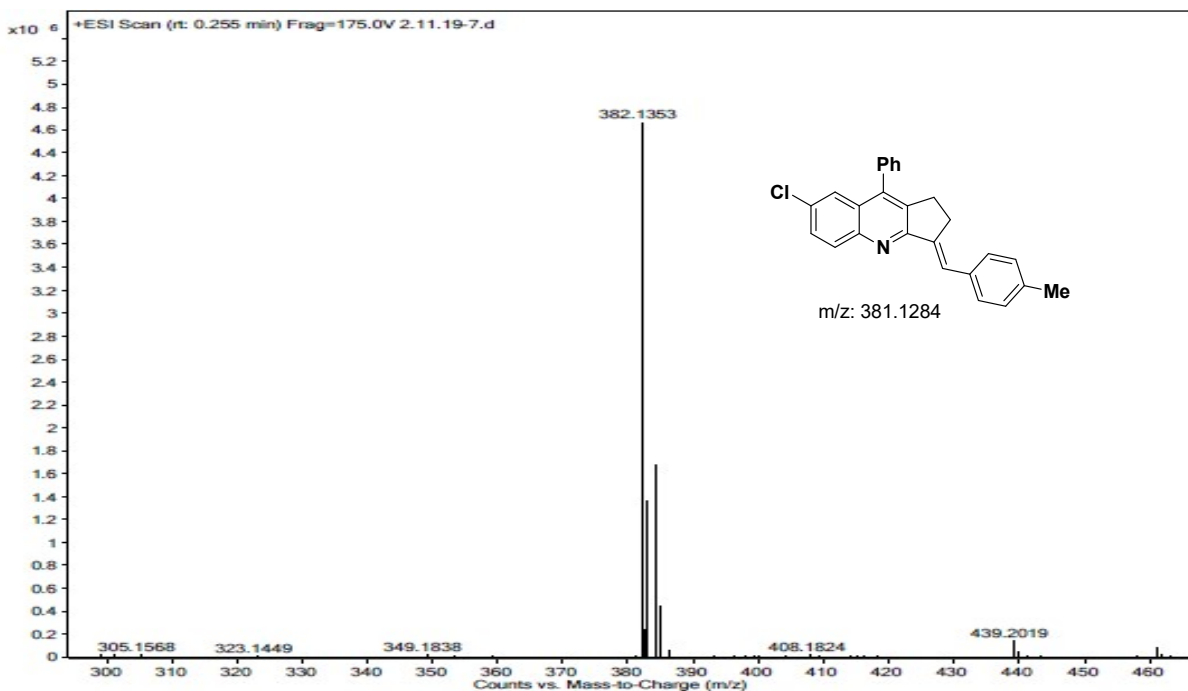

**7-Chloro-3-(4-methoxybenzylidene)-9-phenyl-2,3-dihydro-1H-cyclopenta[b]quinoline(7b):**

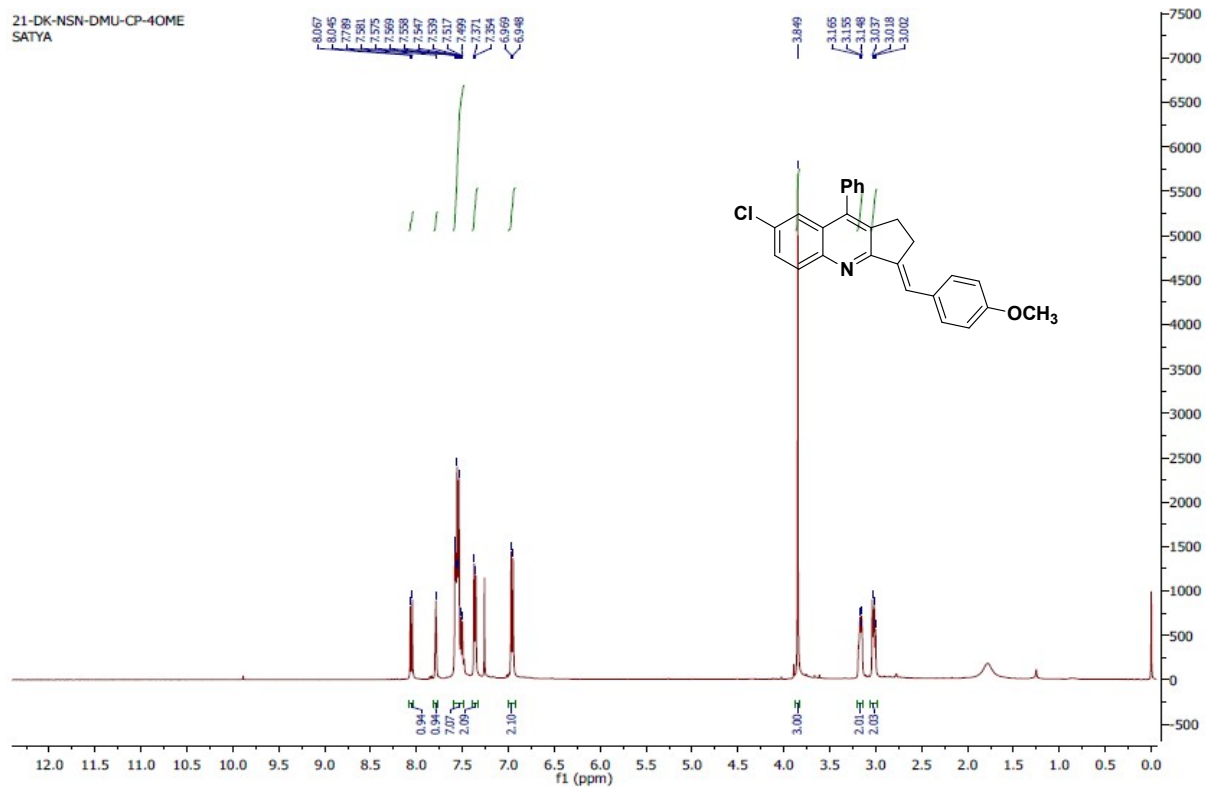

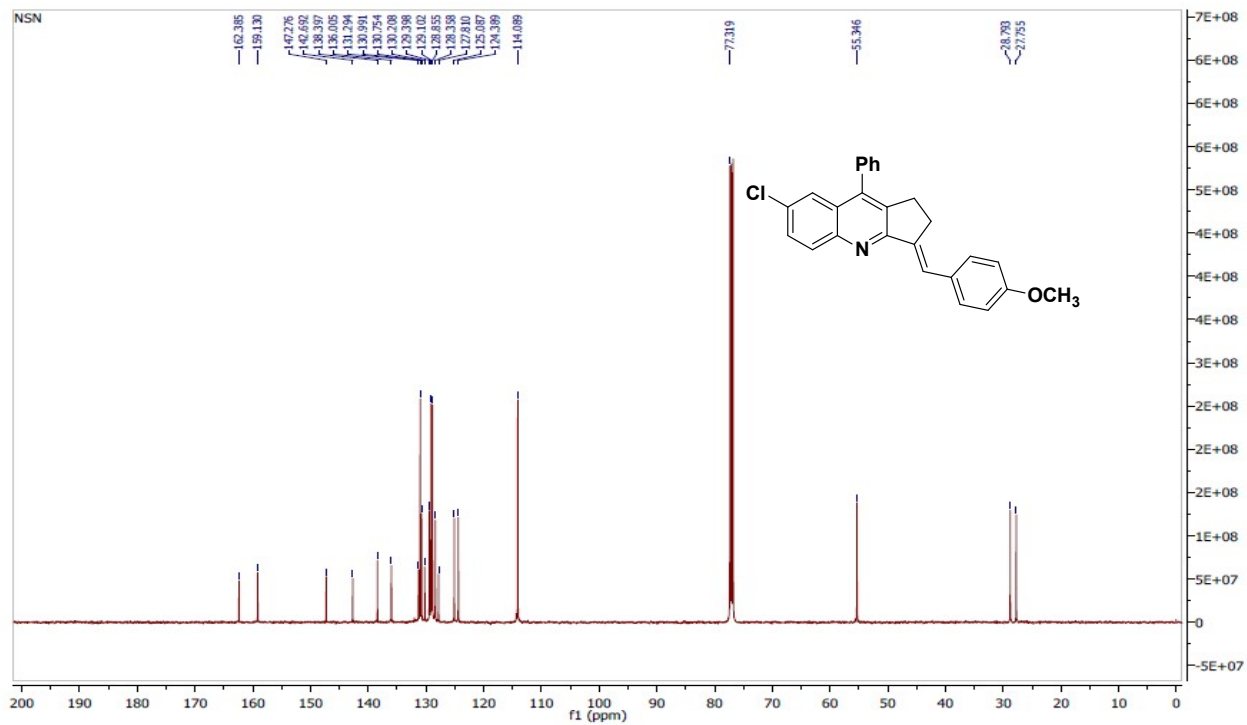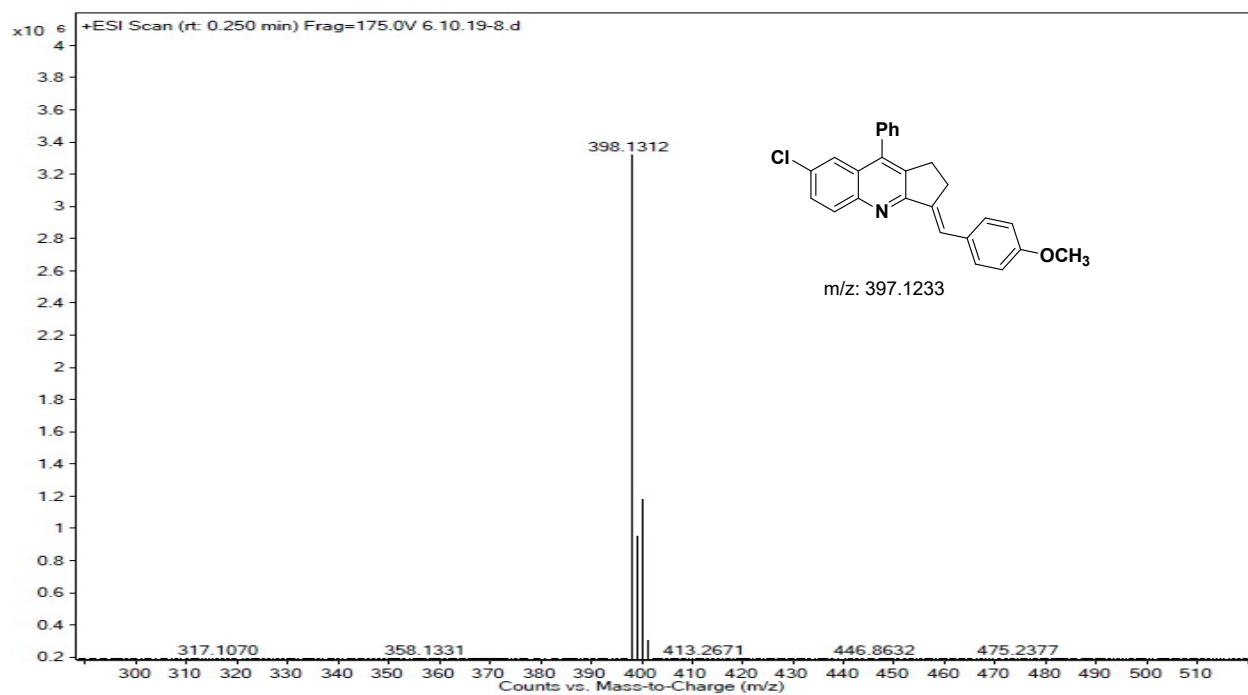

4-((7-Chloro-9-phenyl-1H-cyclopenta[b]quinolin-3(2H)-ylidene)methyl)-N,N-dimethylaniline (7c):

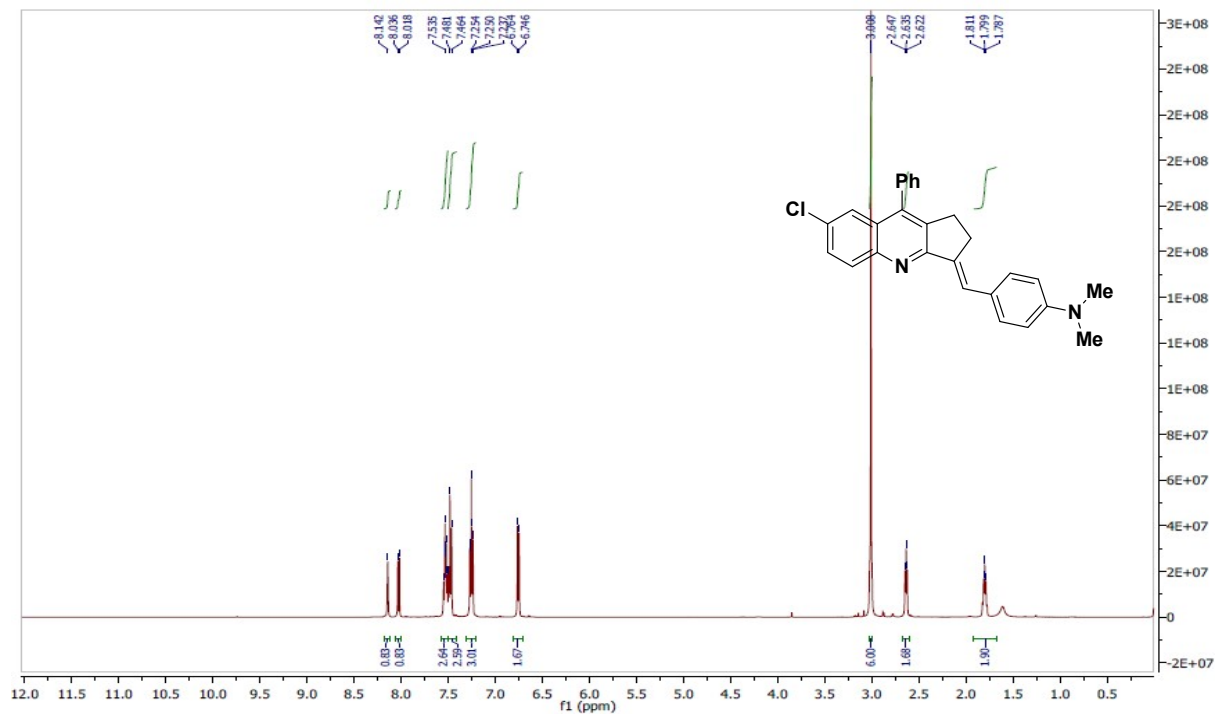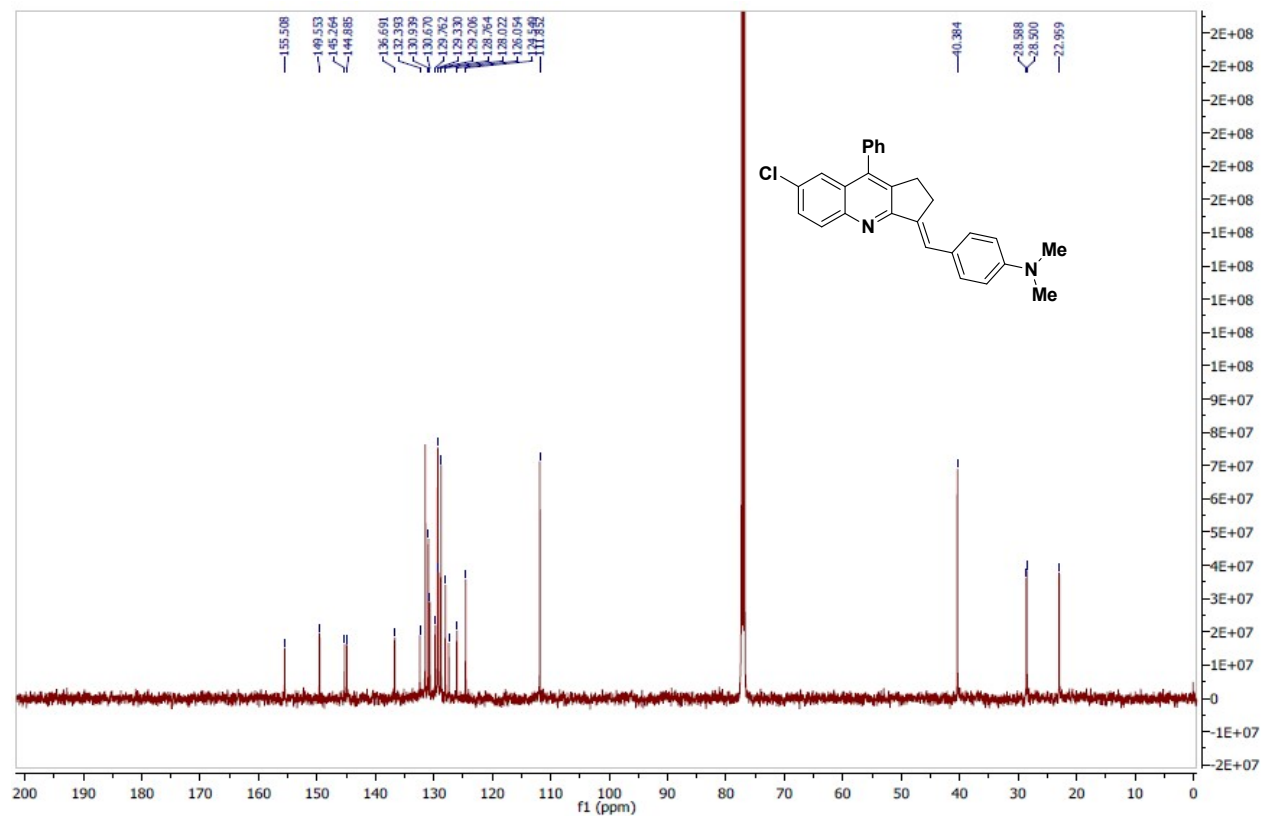

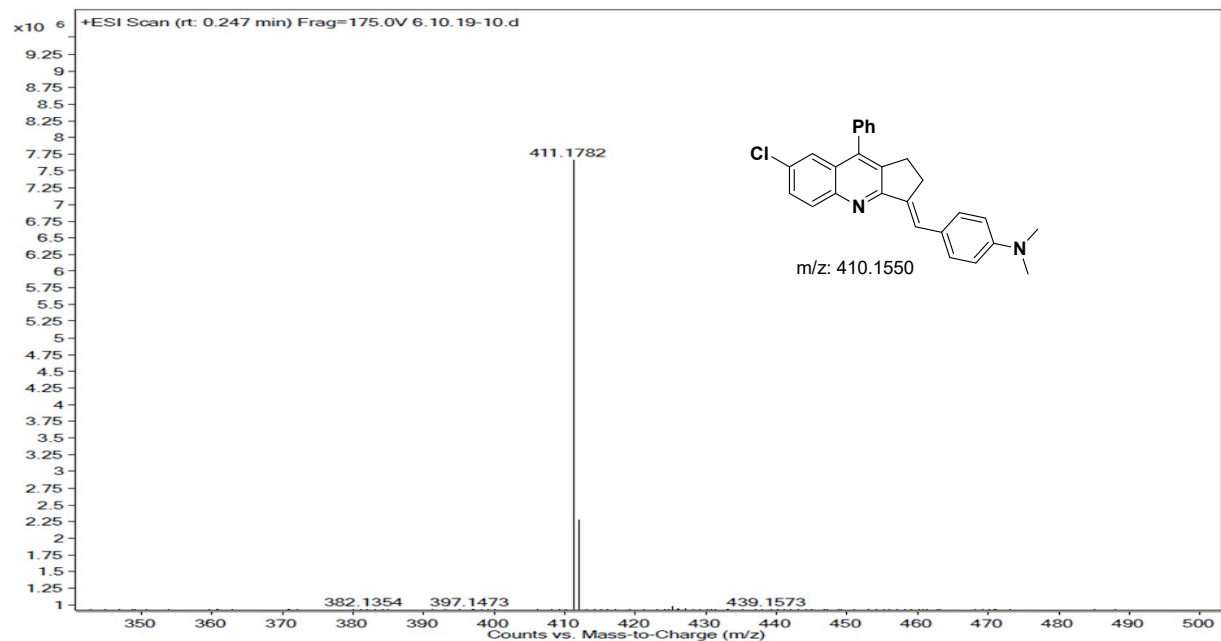

**6-Chloro-2-(furan-2-ylmethylene)-8-phenyl-1,2-dihydrocyclobuta[b]quinoline (7d):**

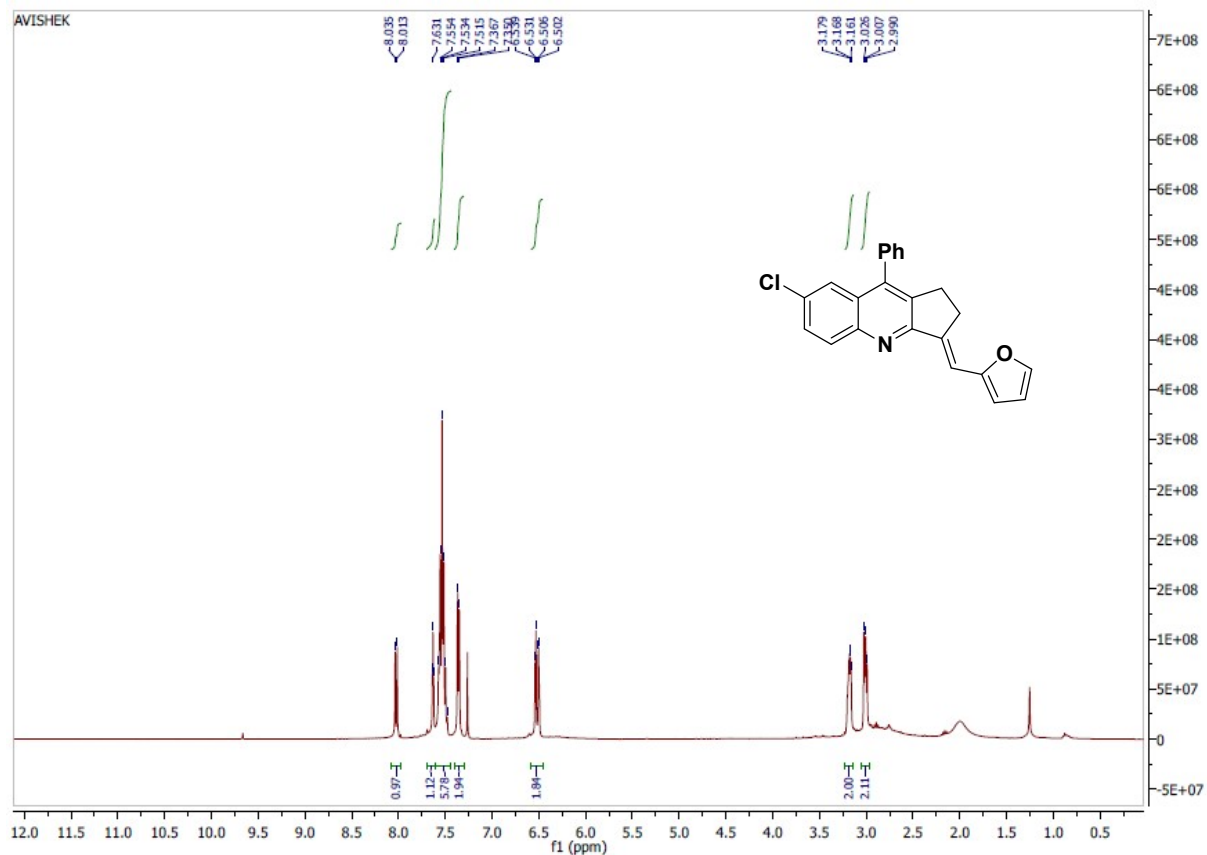



SUMI

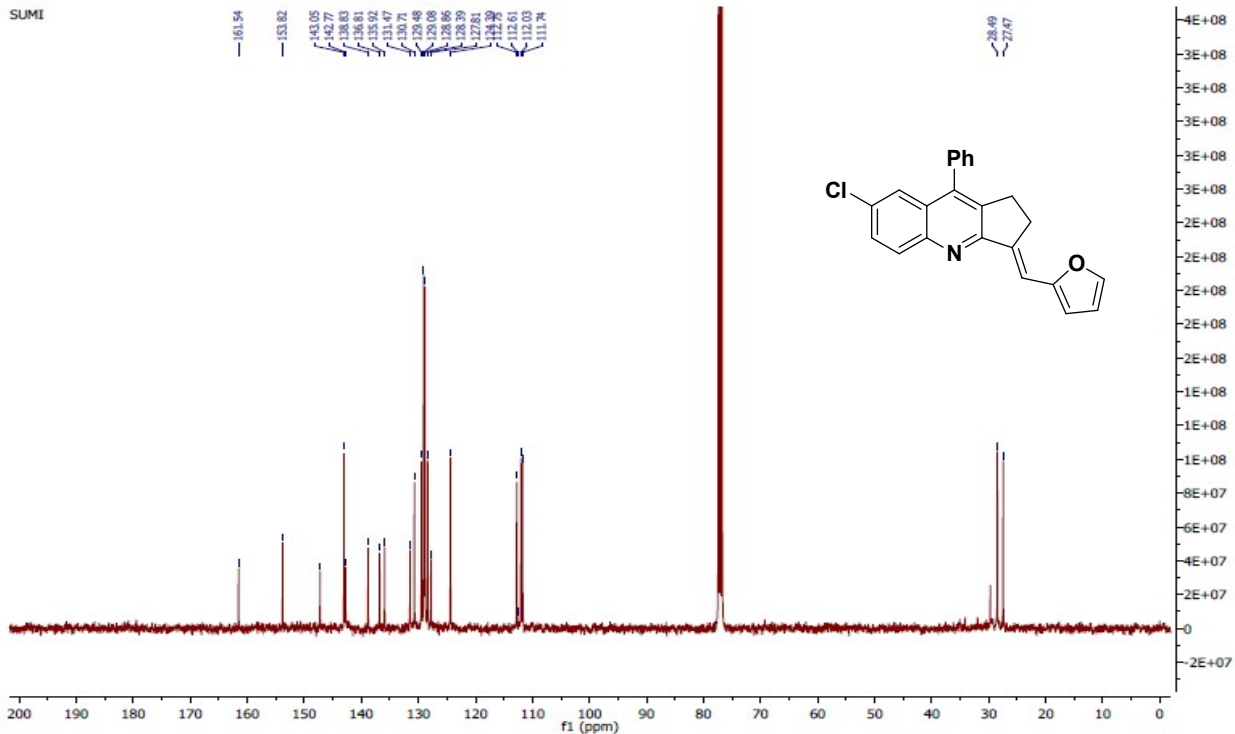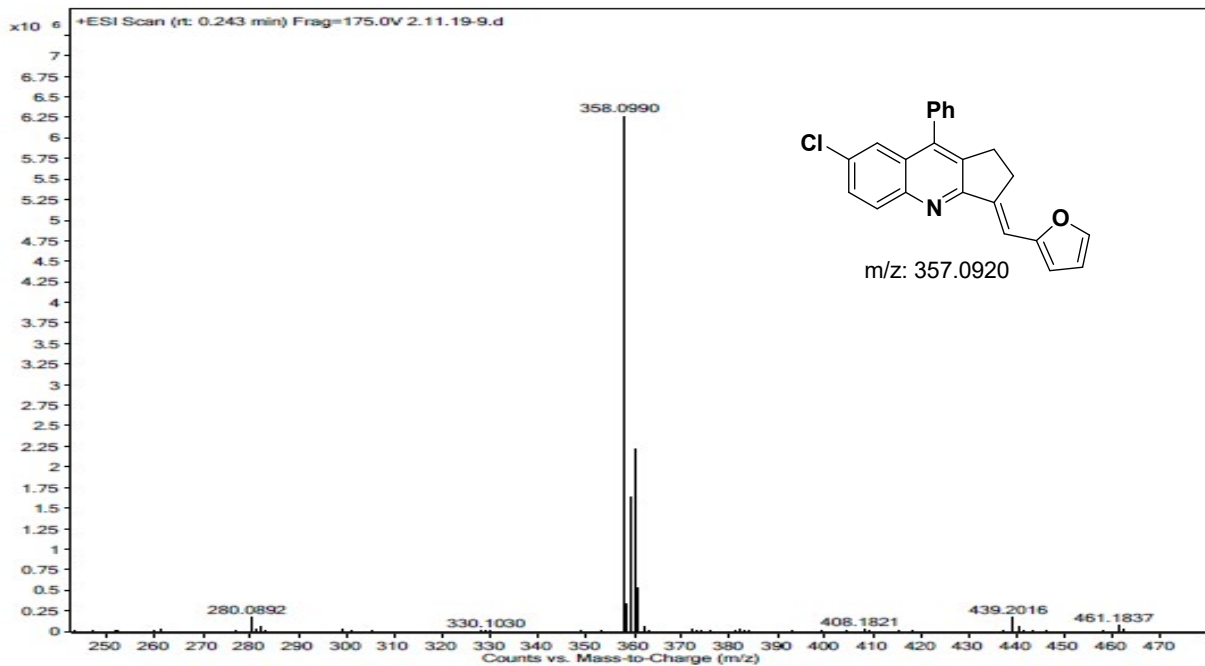

**7-Chloro-3-((E)-3-(4-methoxyphenyl)allylidene)-9-phenyl-2,3-dihydro-1H-cyclopenta[b]quinolone (7e):**

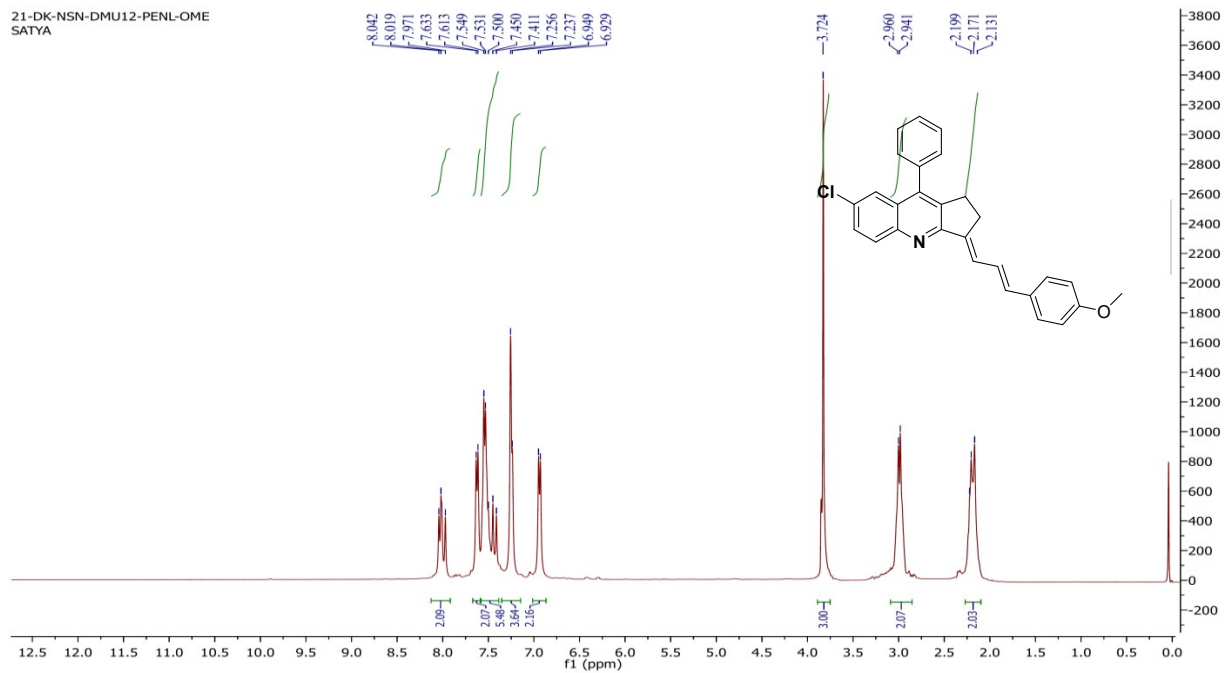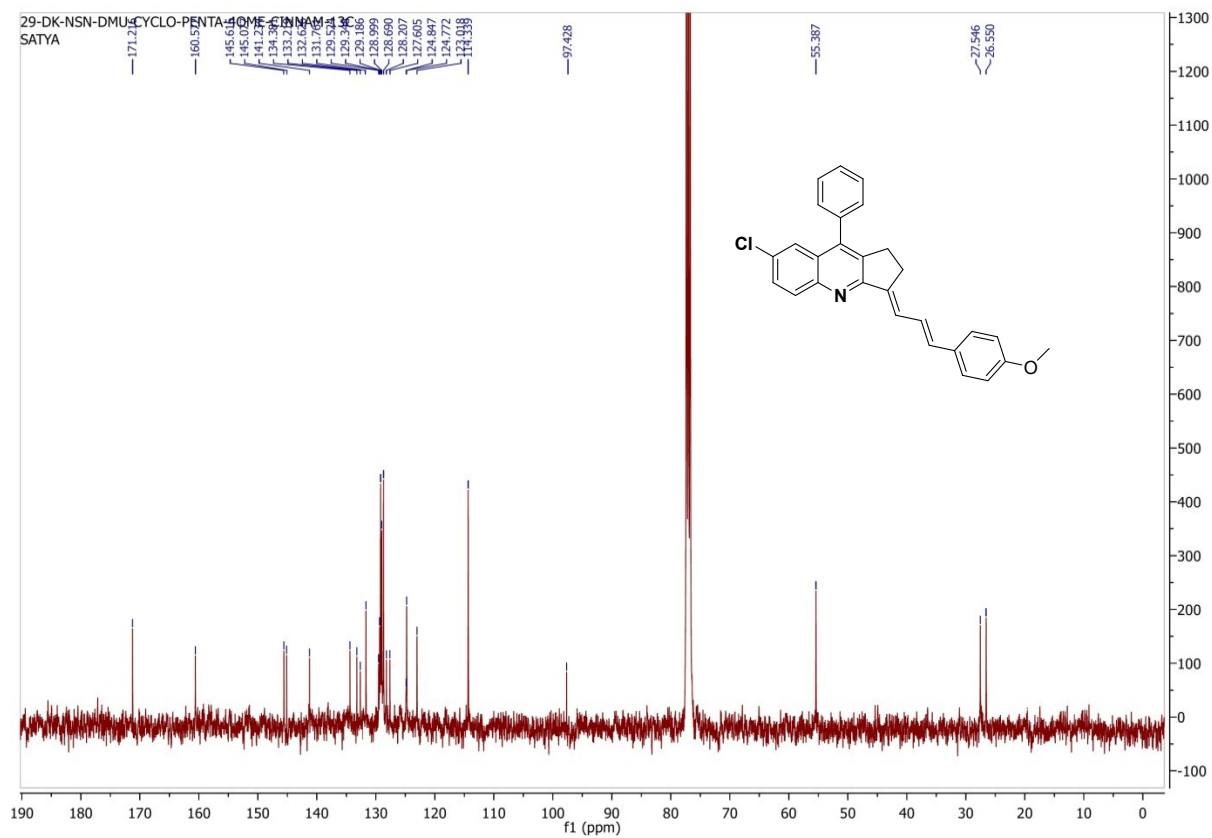

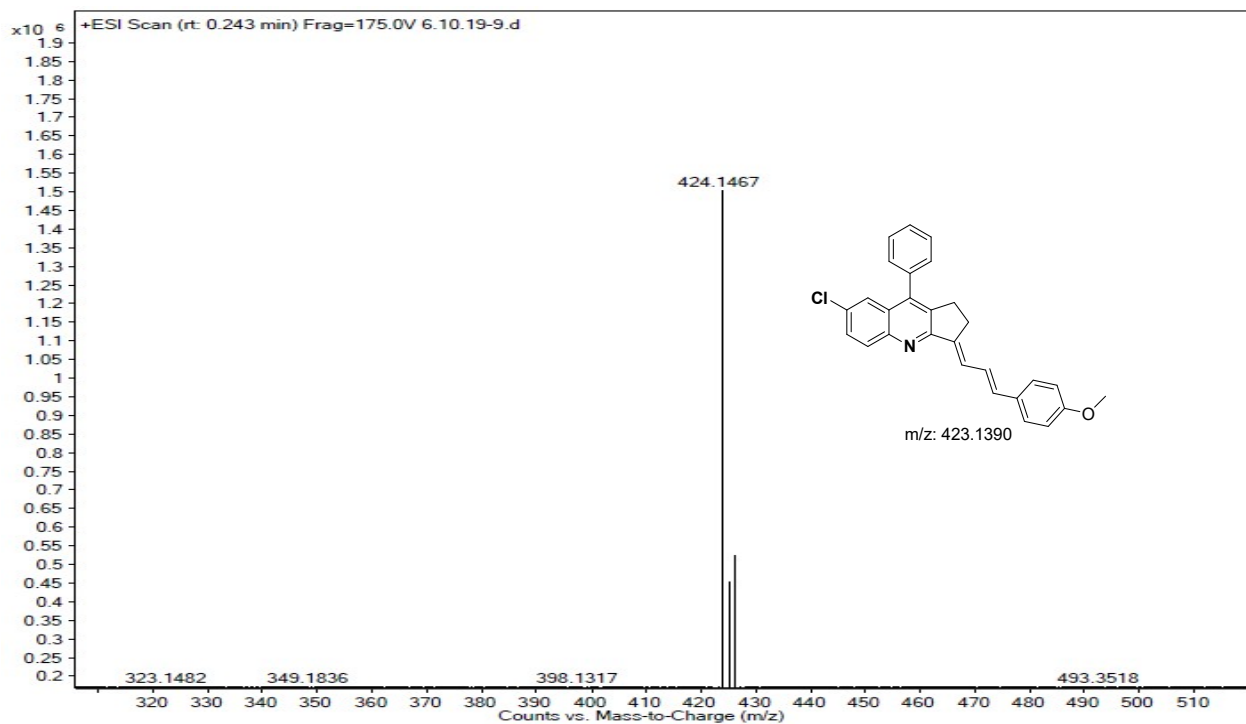

**7-Chloro-4-(4-methylbenzylidene)-9-phenyl-1,2,3,4-tetrahydroacridine (7f):**

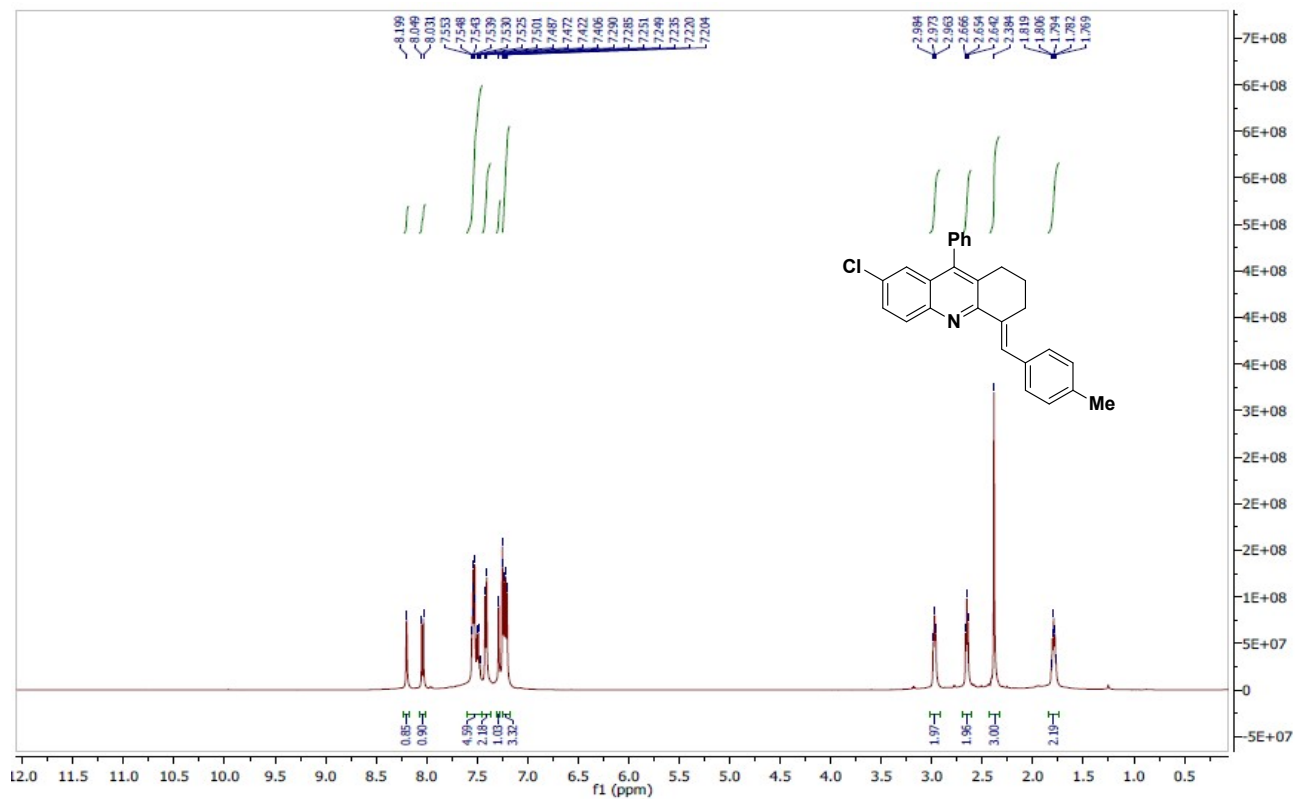

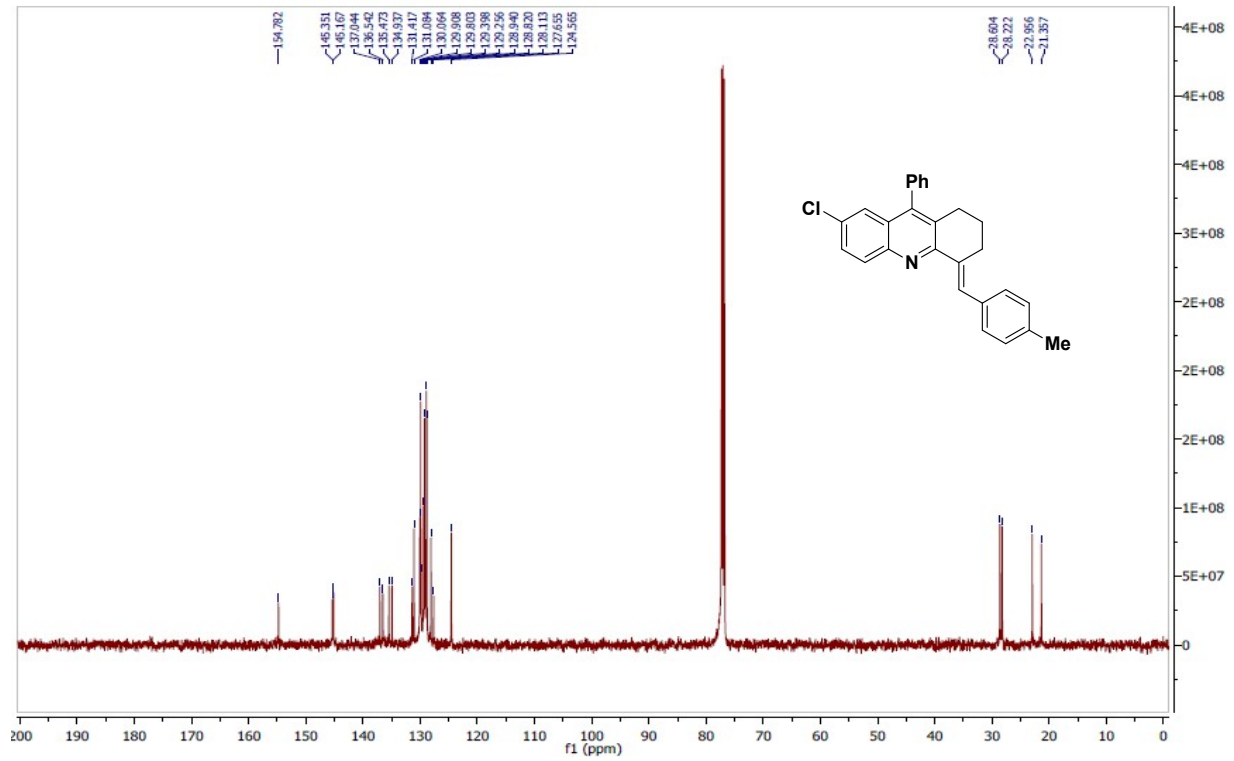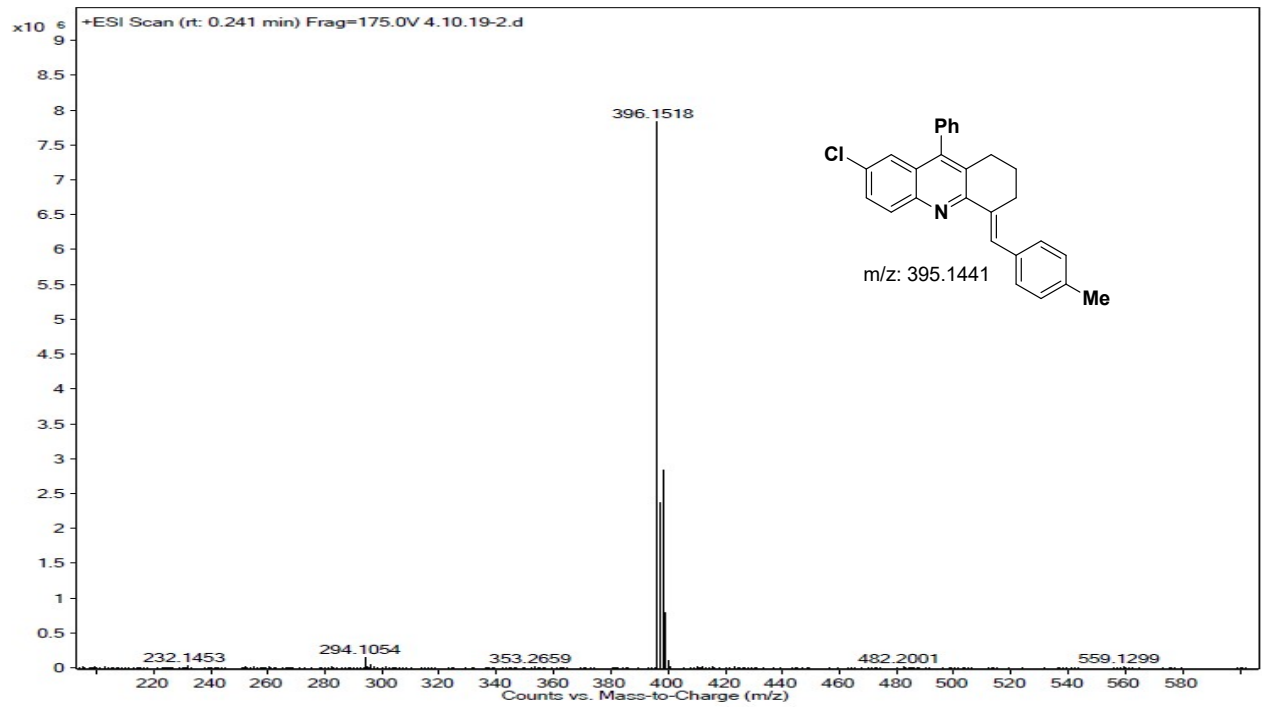

**7-Chloro-4-(4-methoxybenzylidene)-9-phenyl-1,2,3,4-tetrahydroacridine (7g):**

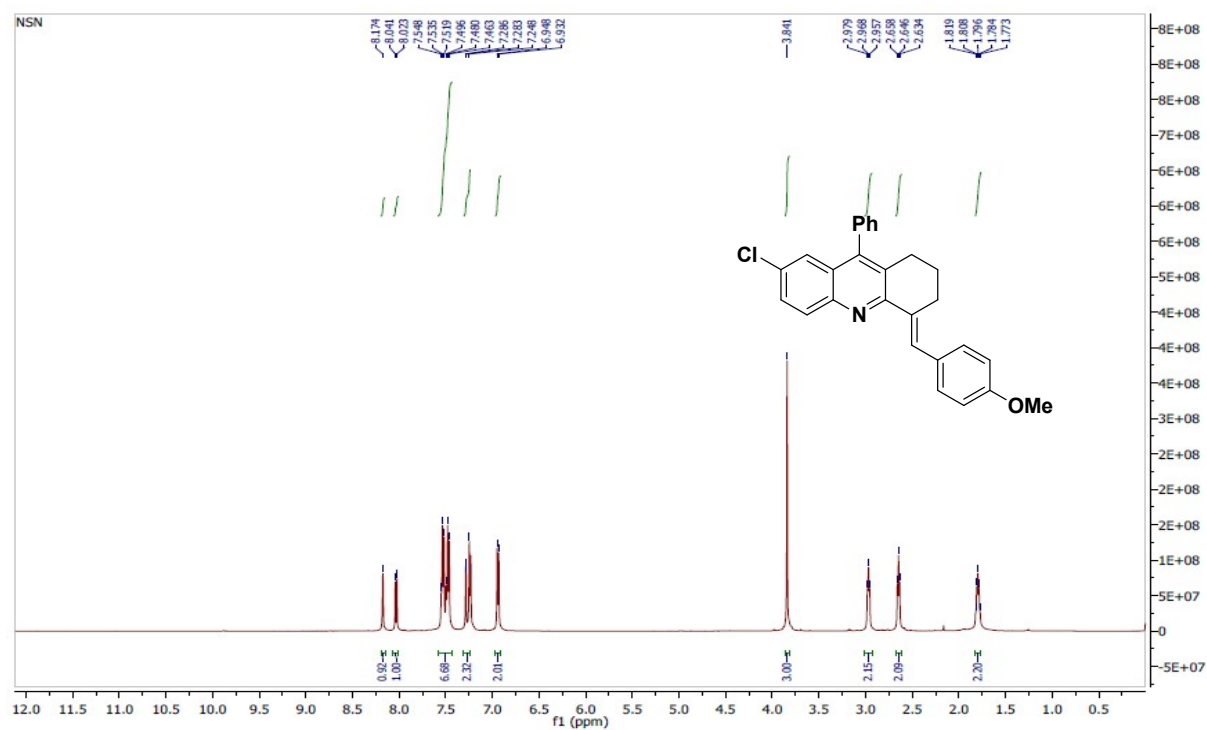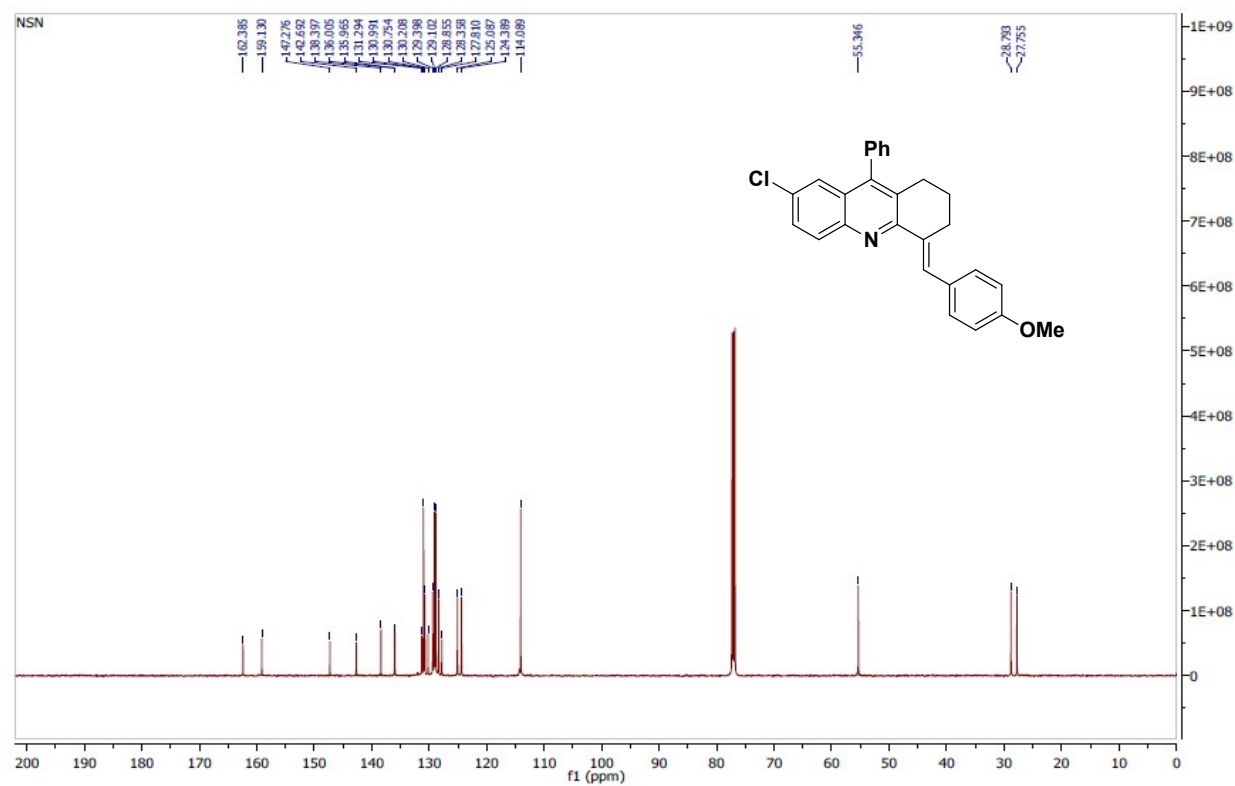

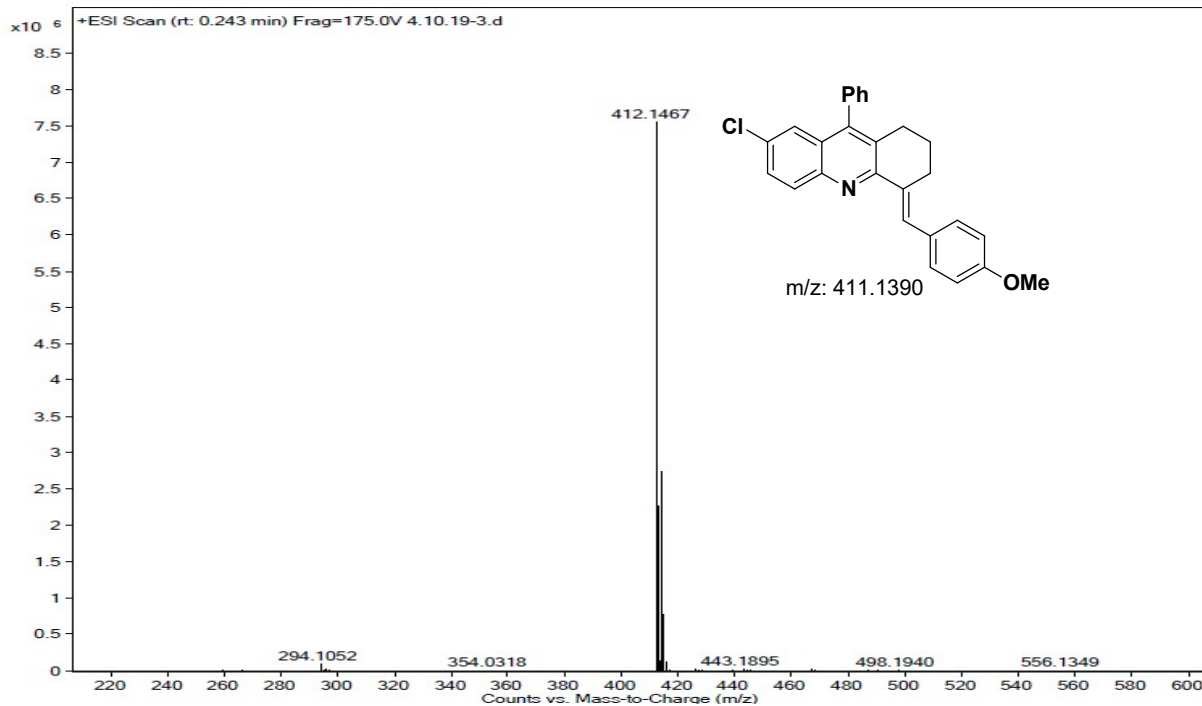

**7-Chloro-4-(4-chlorobenzylidene)-9-phenyl-1,2,3,4-tetrahydroacridine (7h):**

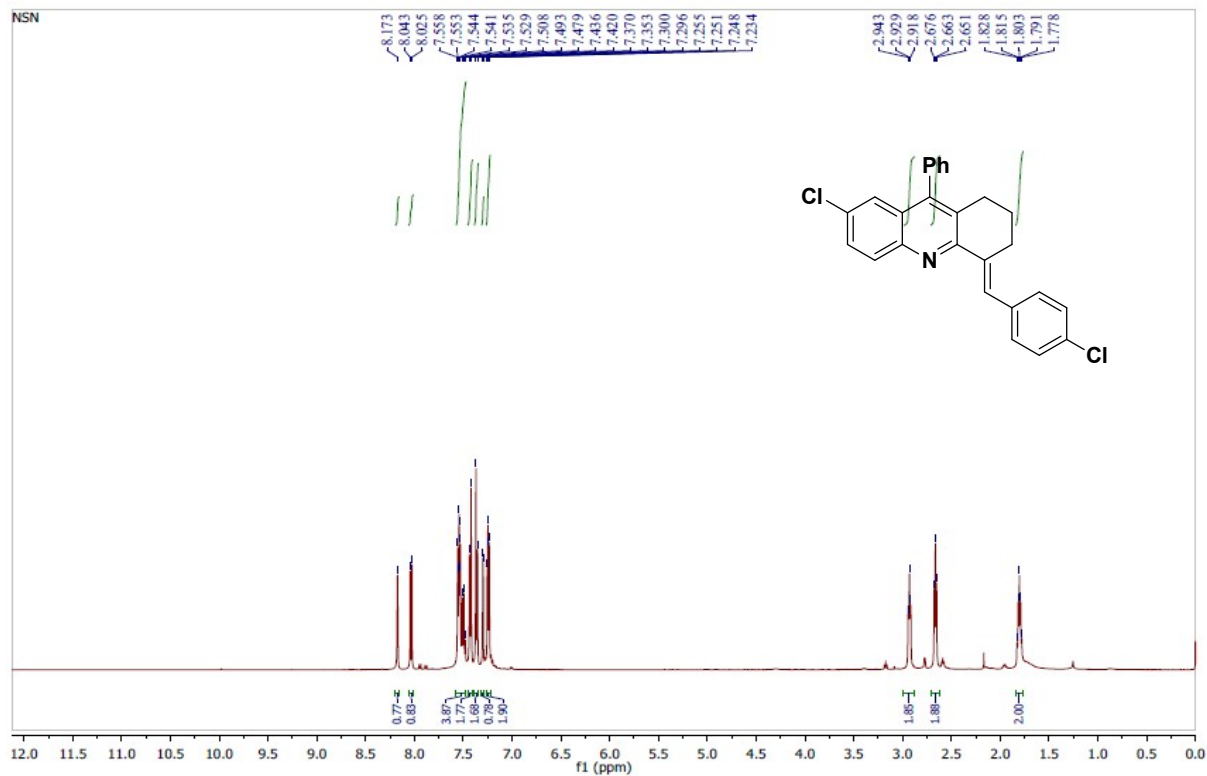

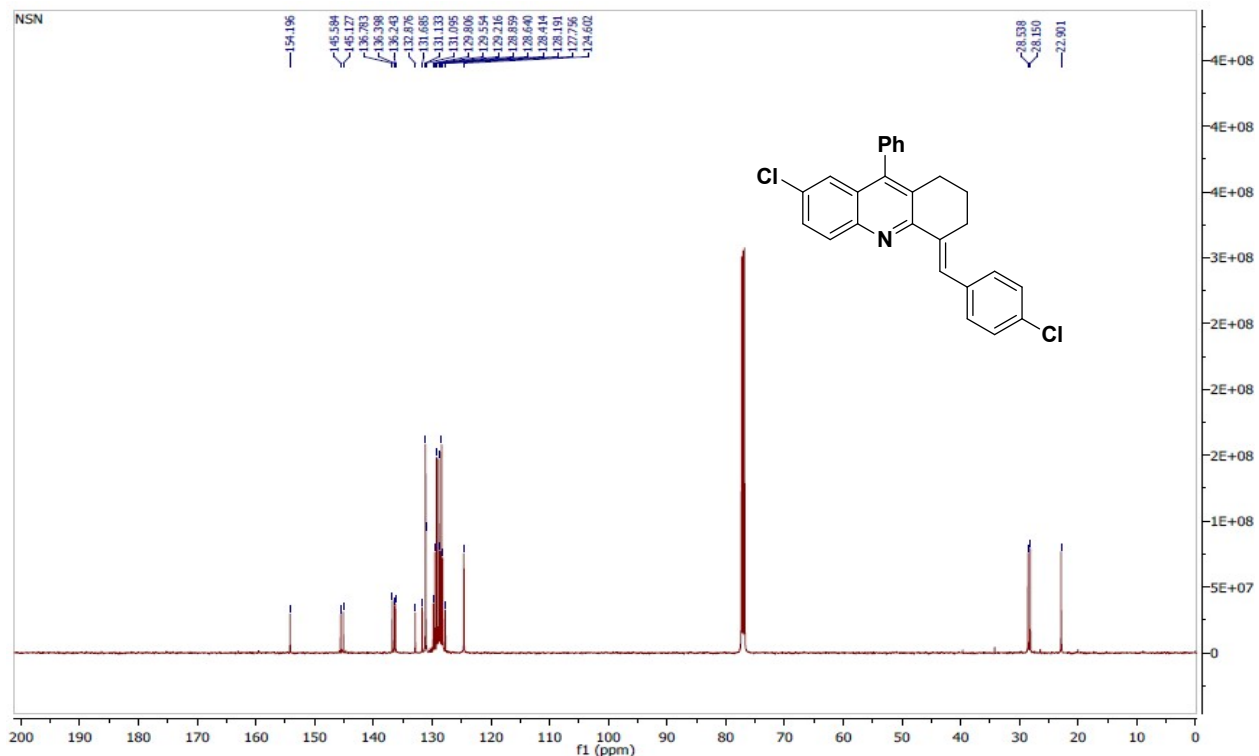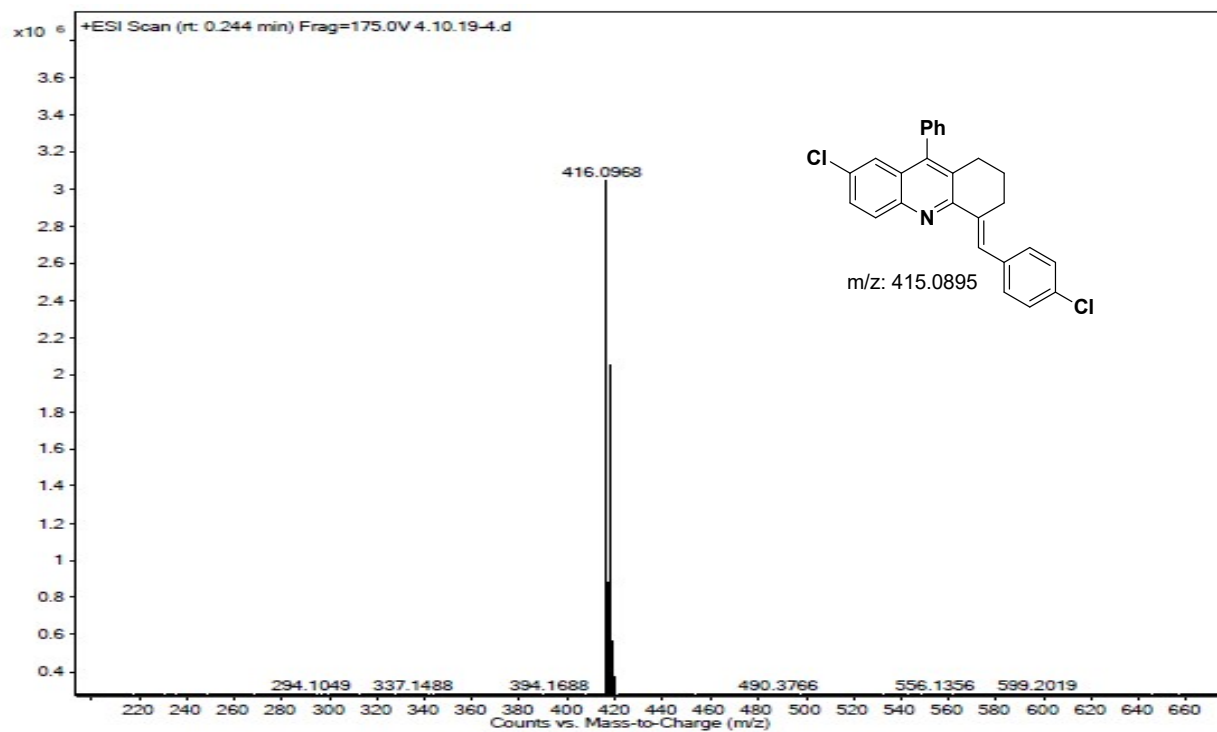

**4-(4-Bromobenzylidene)-7-chloro-9-phenyl-1,2,3,4-tetrahydroacridine (7i):**

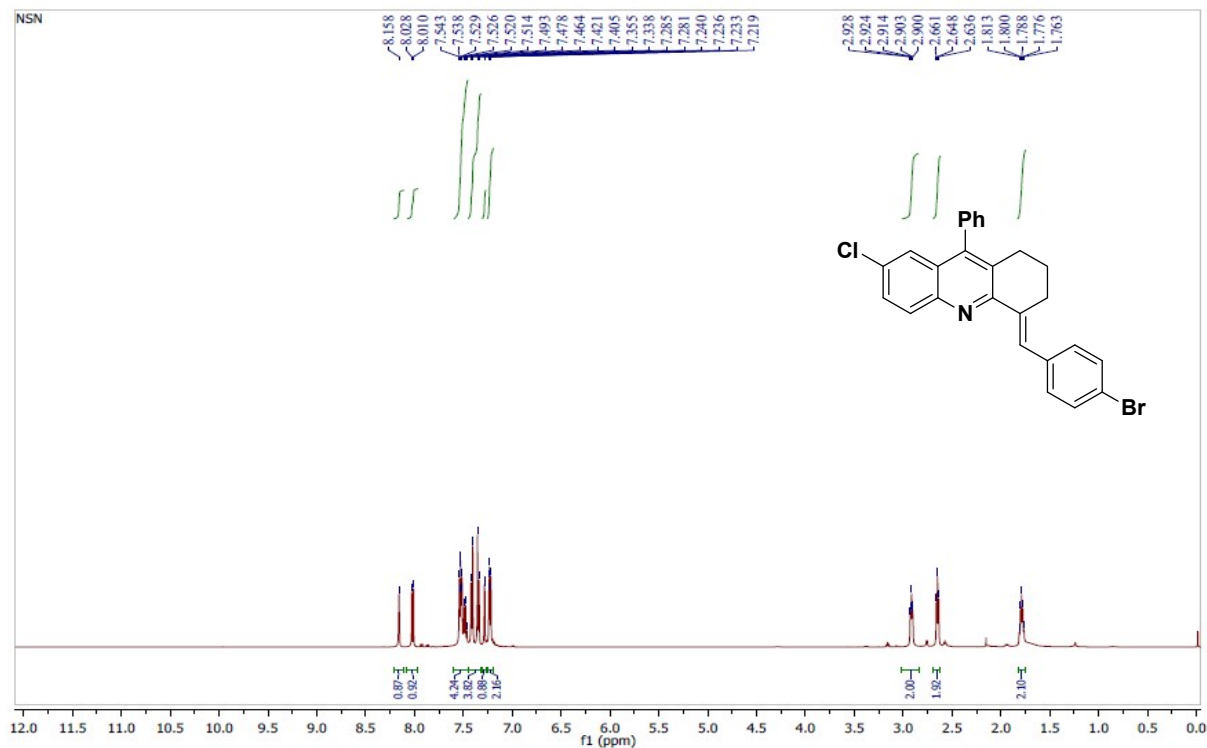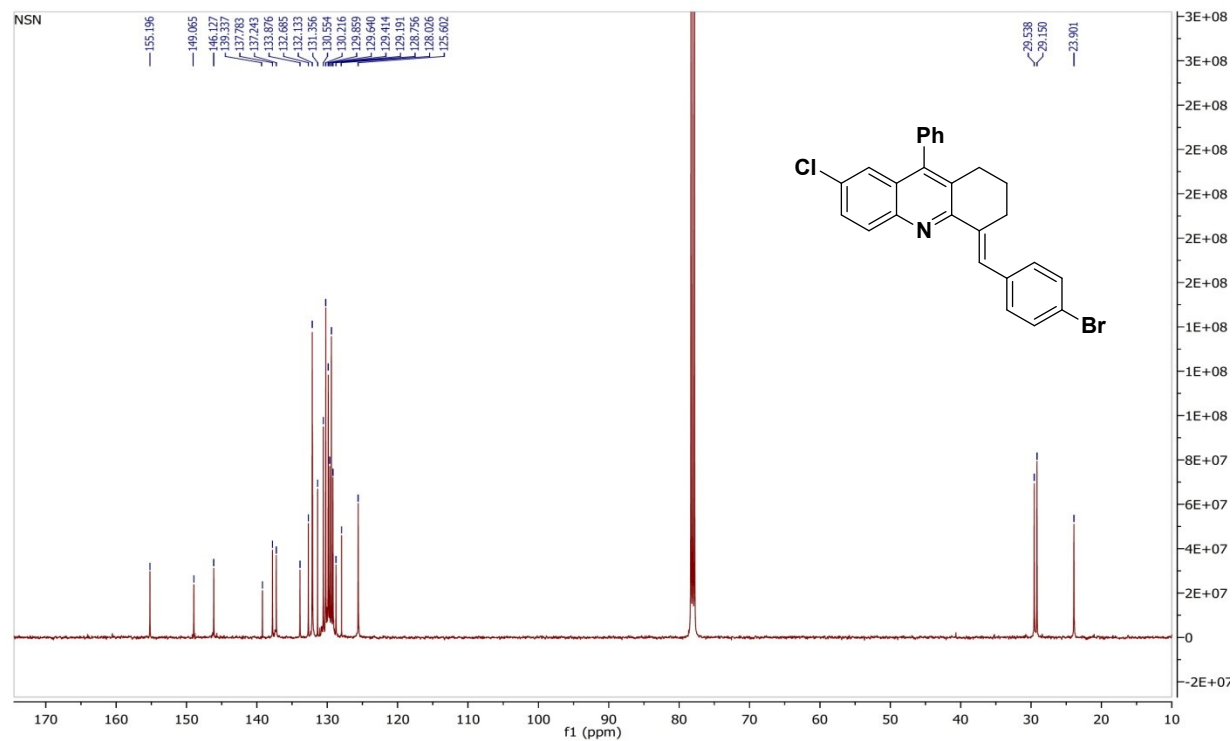



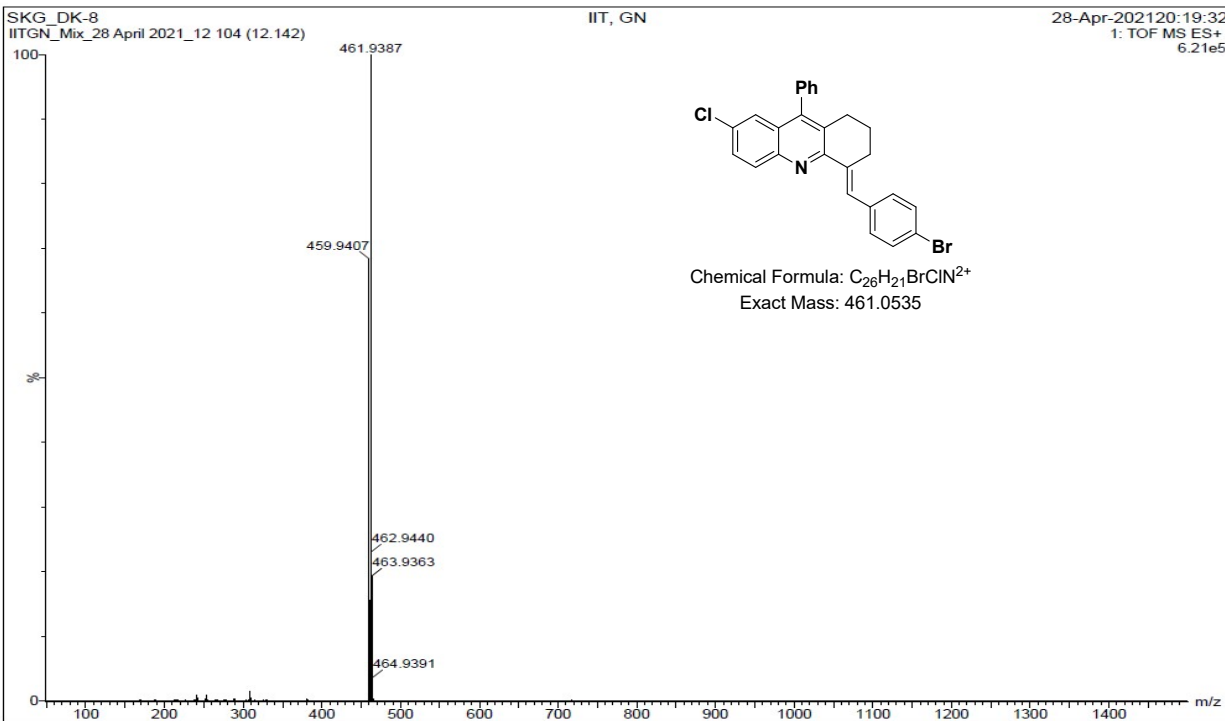

**3-((7-Chloro-9-phenyl-2,3-dihydroacridin-4(1H)-ylidene)methyl)-2-hydroxy-4H-chromen-4-one (7j):**

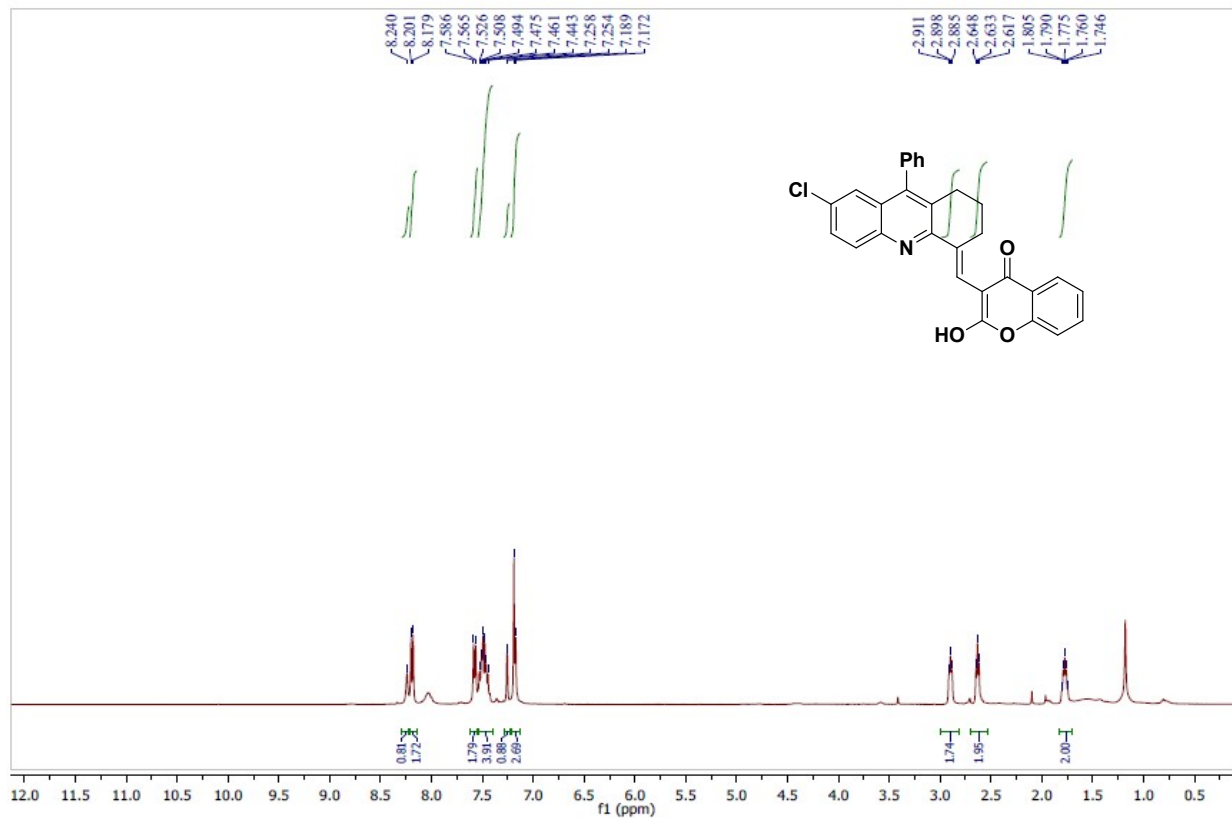

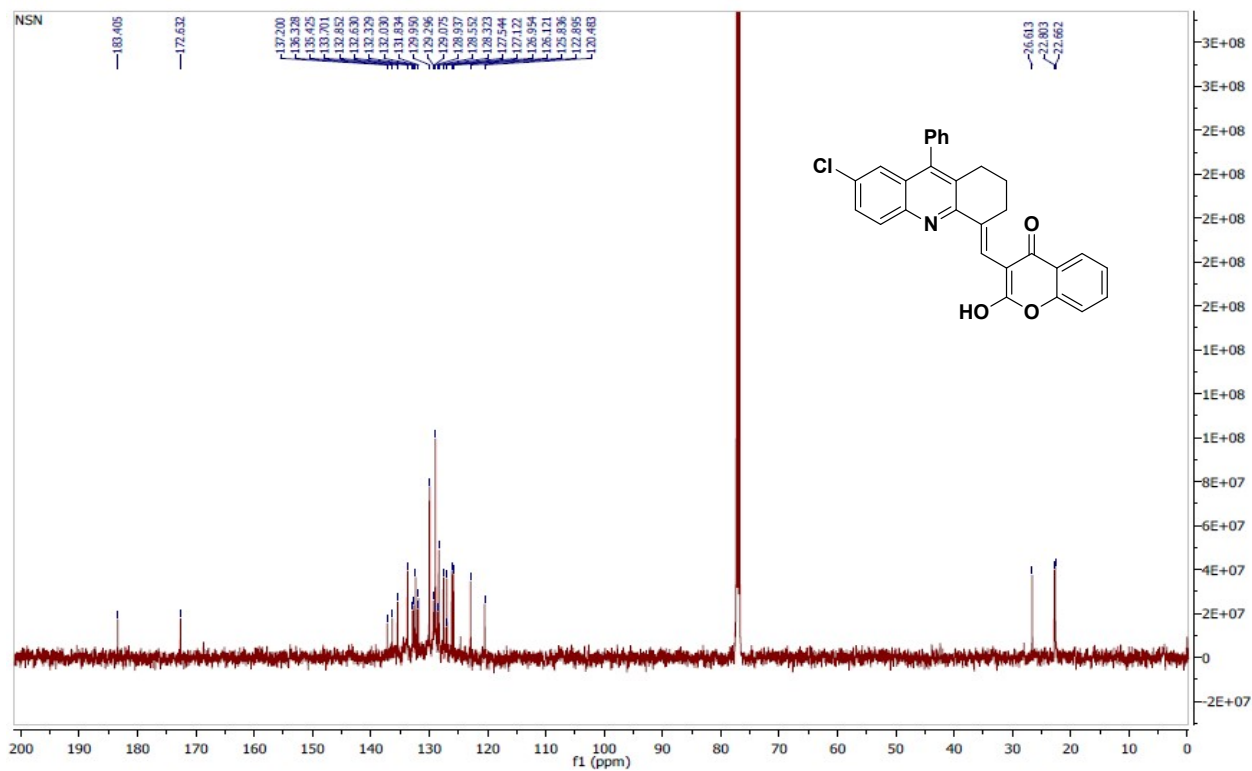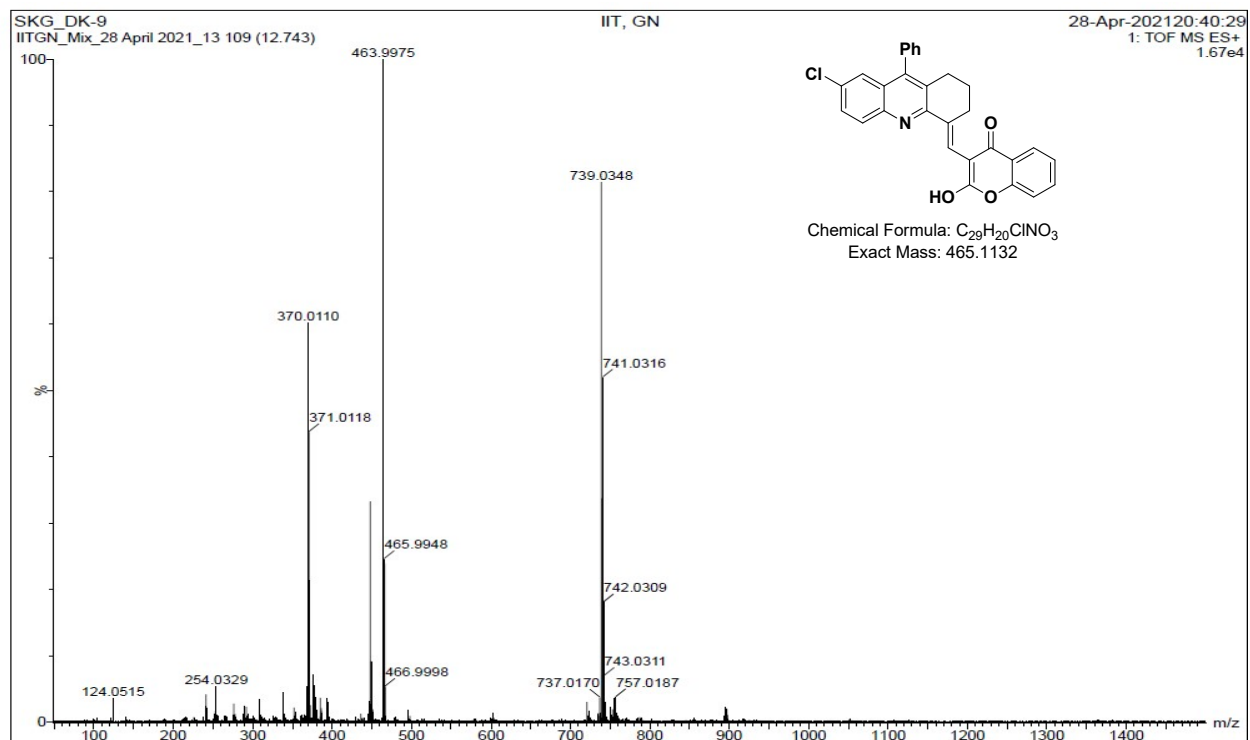

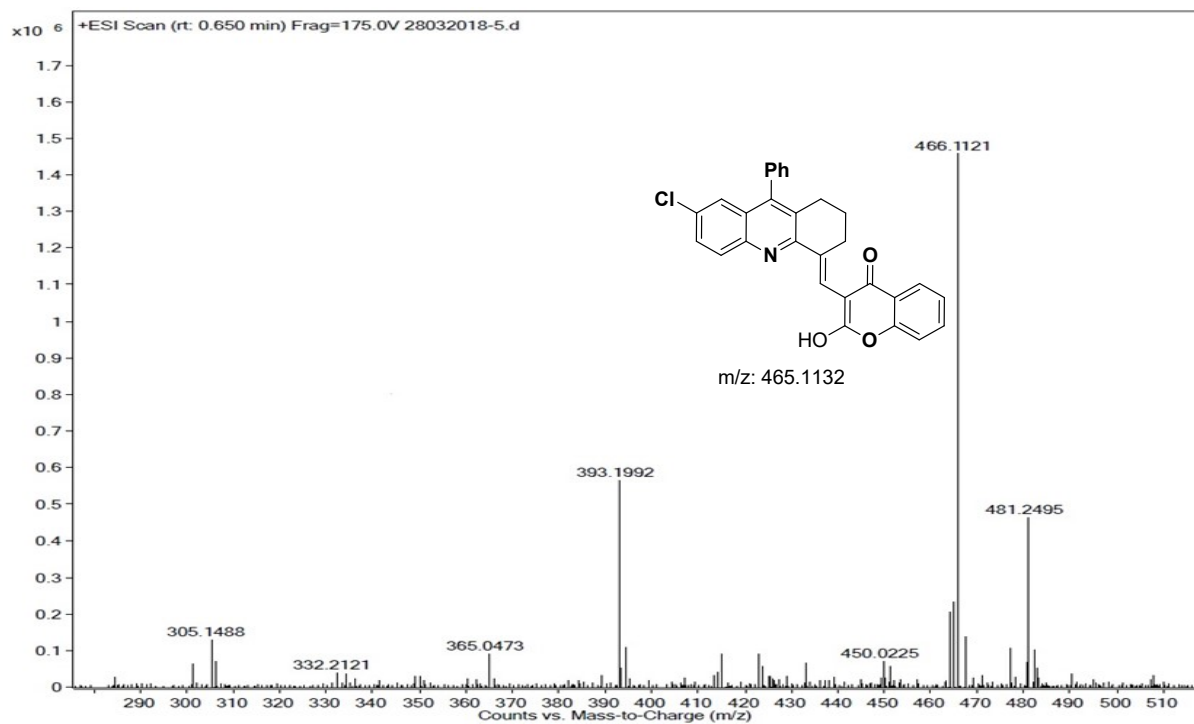

***Tert-butyl-8-chloro-4-(4-methylbenzylidene)-10-phenyl-3,4-ihydrobenzo[b][1,6]naphthyridine-2(1H)-carboxylate (8a):***

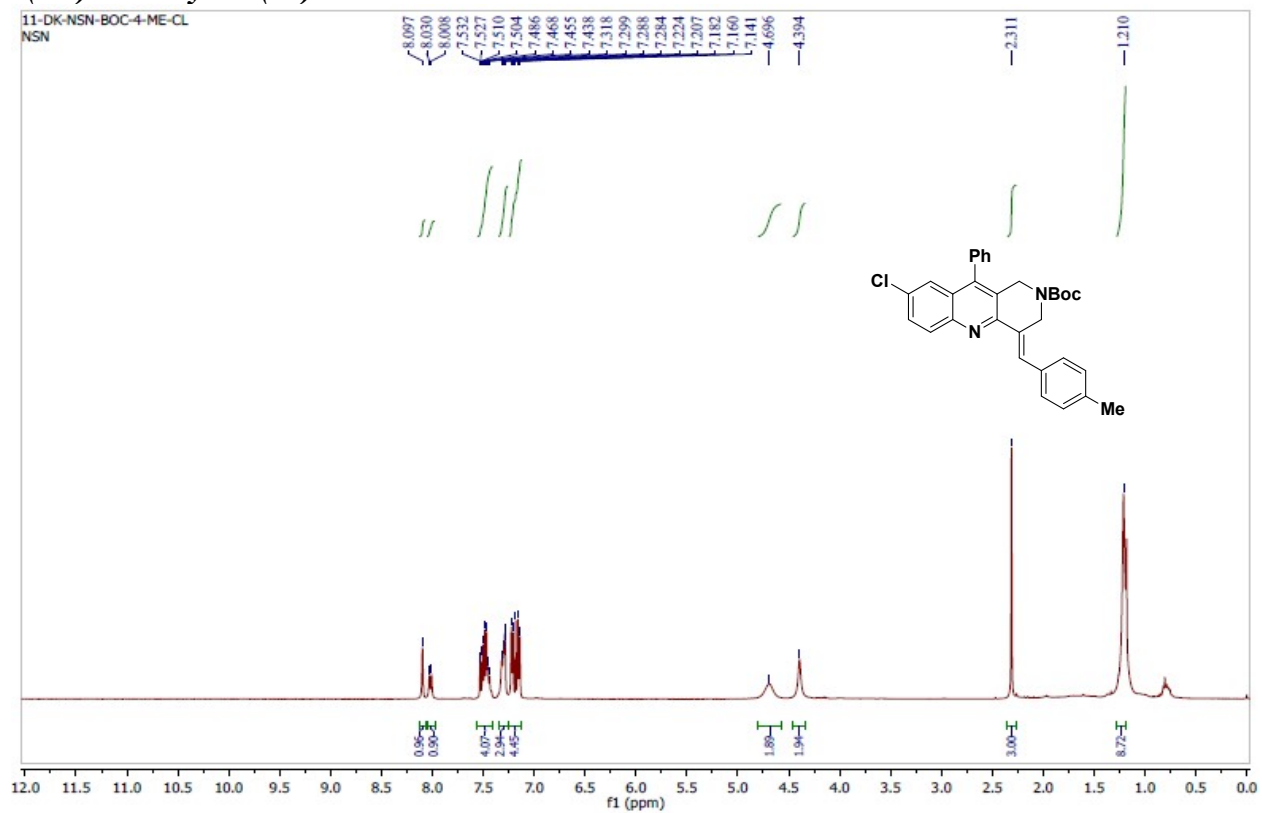

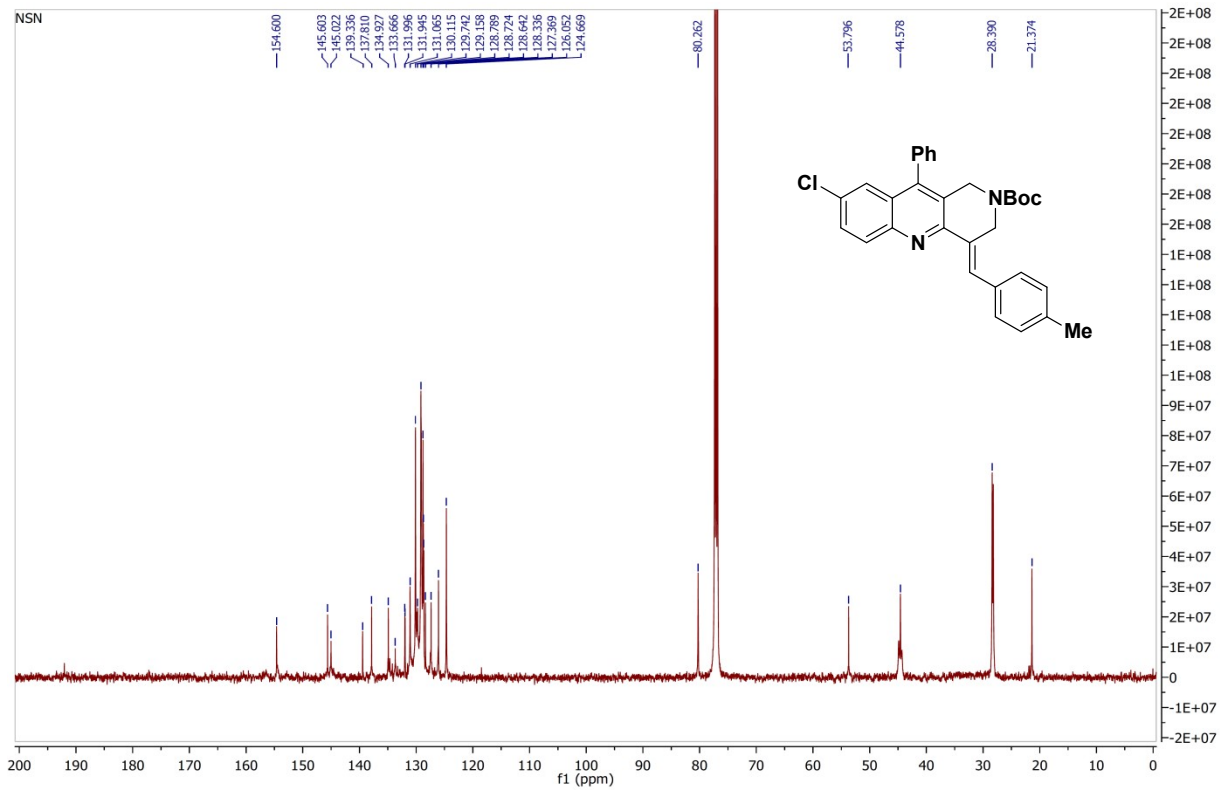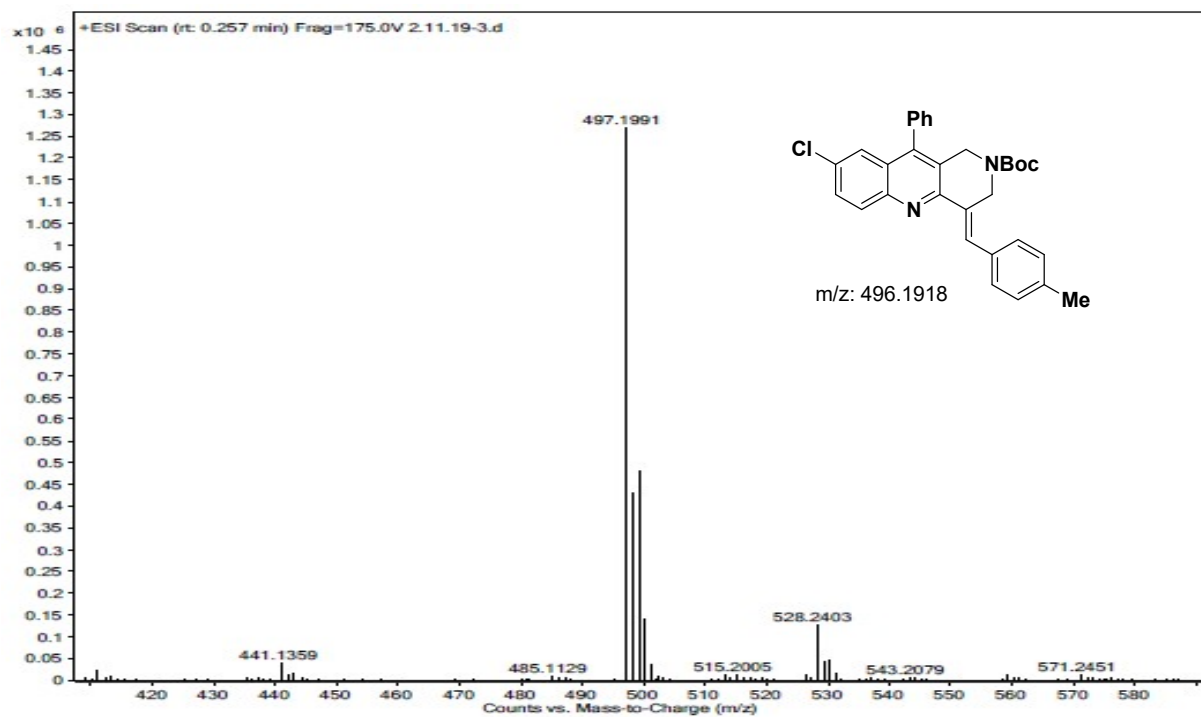

***Tert-butyl-8-chloro-4-(4-methoxybenzylidene)-10-phenyl-3,4-dihydrobenzo[b]-[1,6]-naphthyridine-2(1H)-carboxylate (8b):***

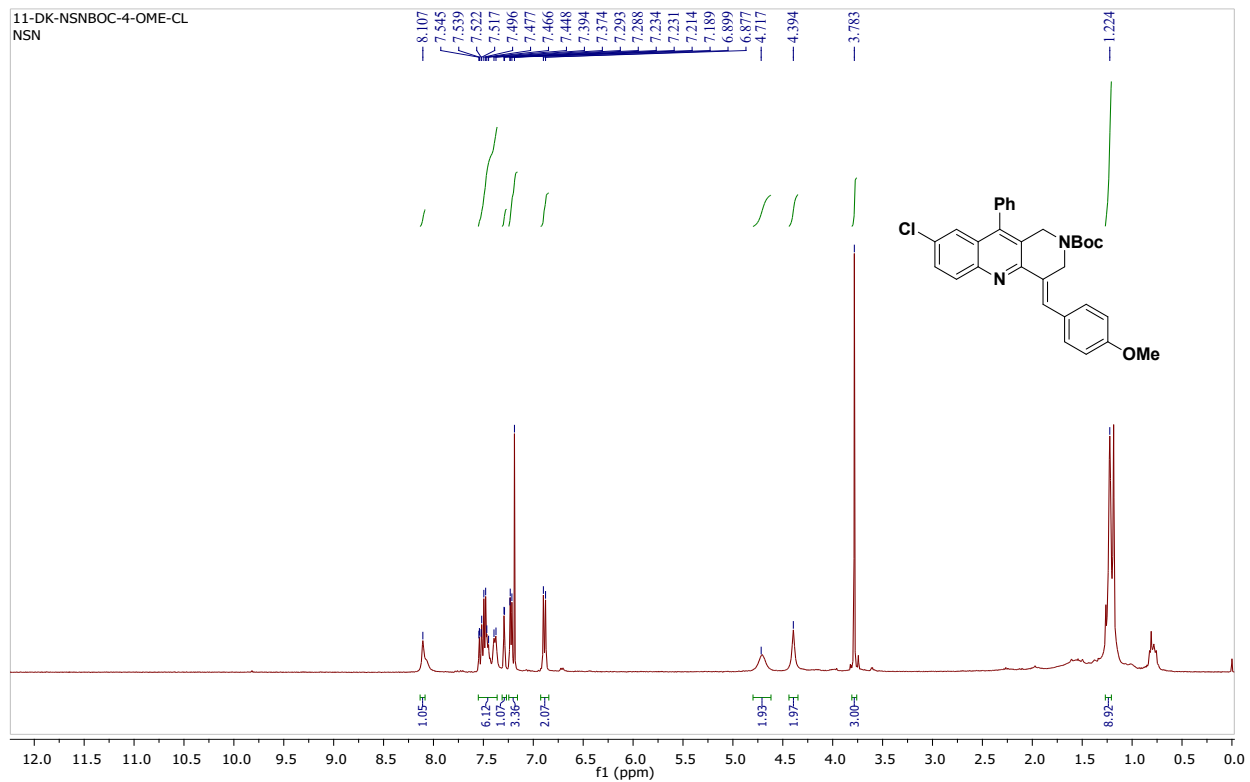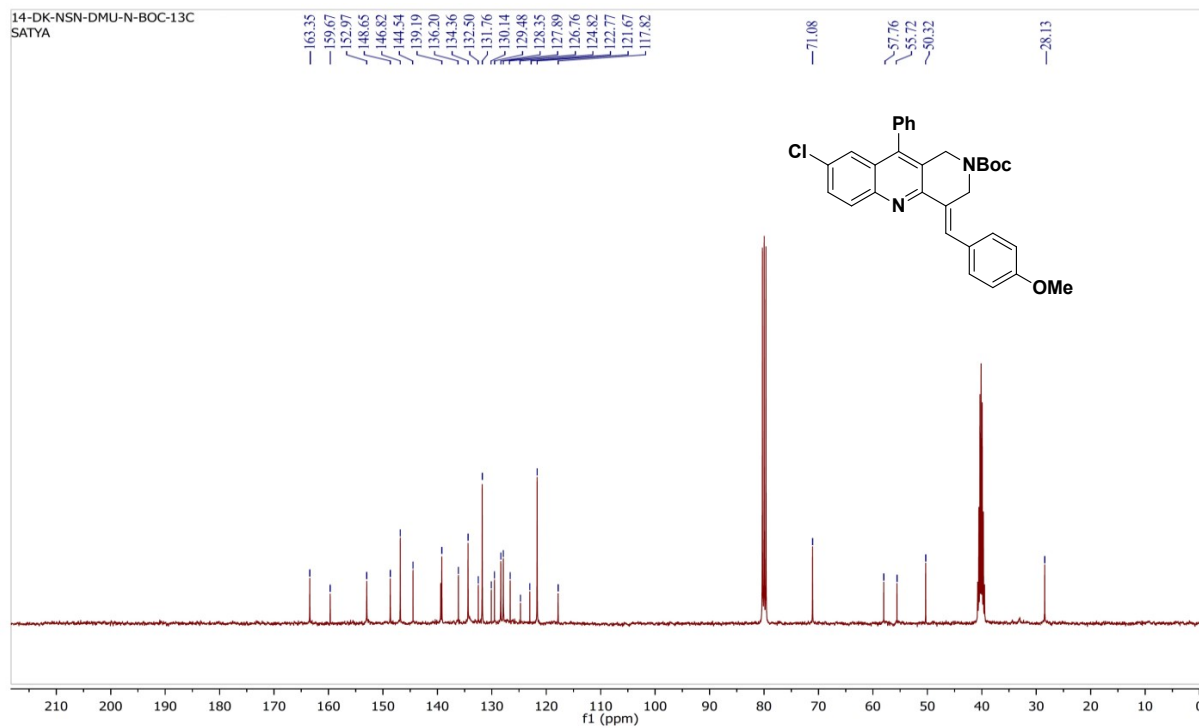

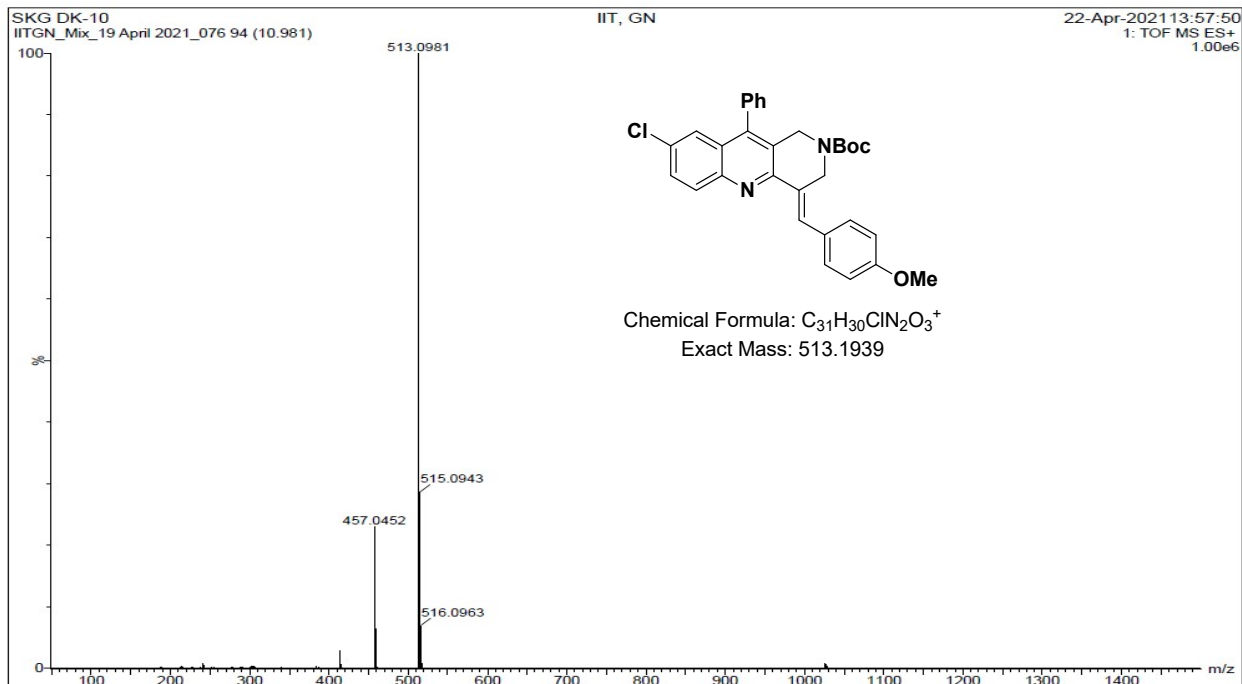

***Tert-butyl-8-chloro-4-(4-hydroxybenzyl)-10-phenyl-3,4-dihydrobenzo-[b][1,6]naphthyridine-2(1H)-carboxylate (8c):***

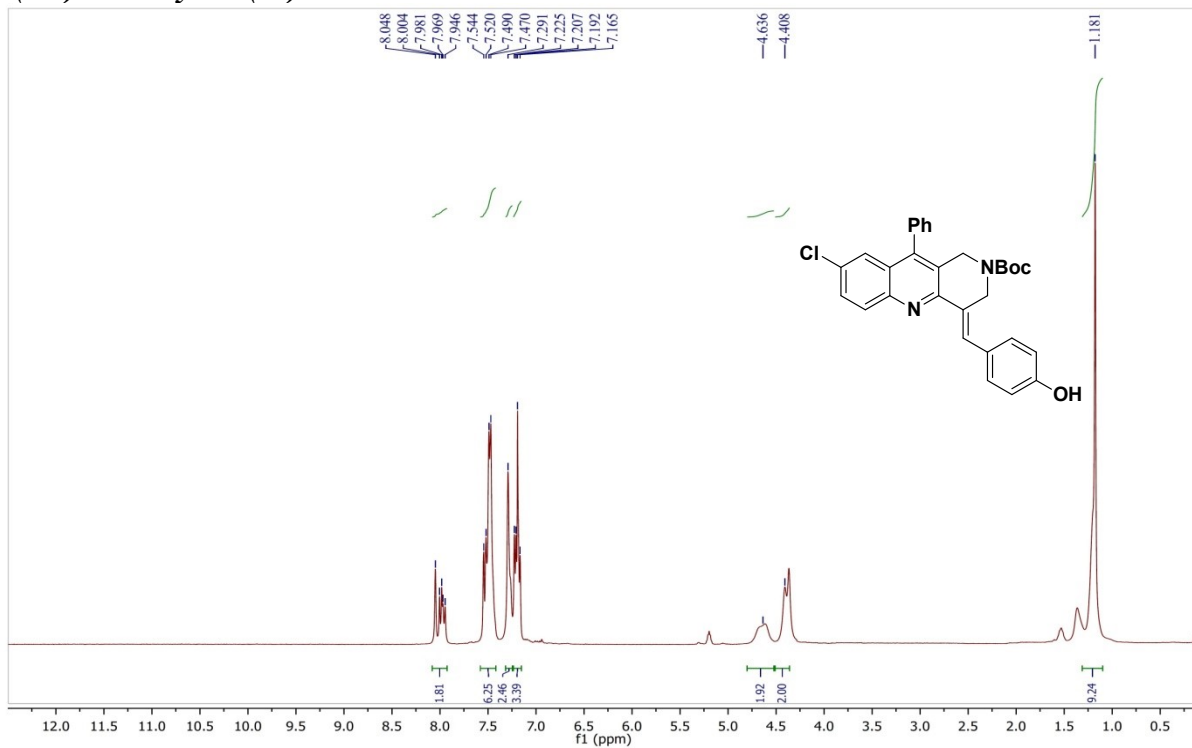

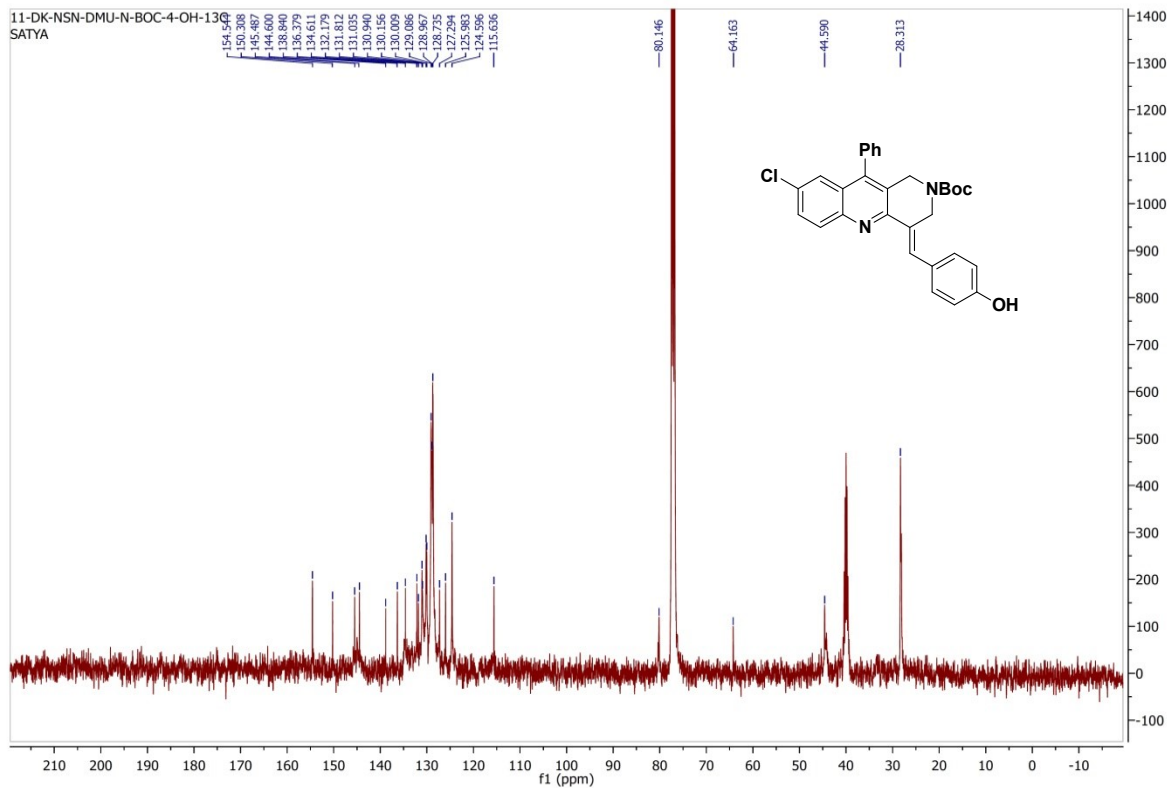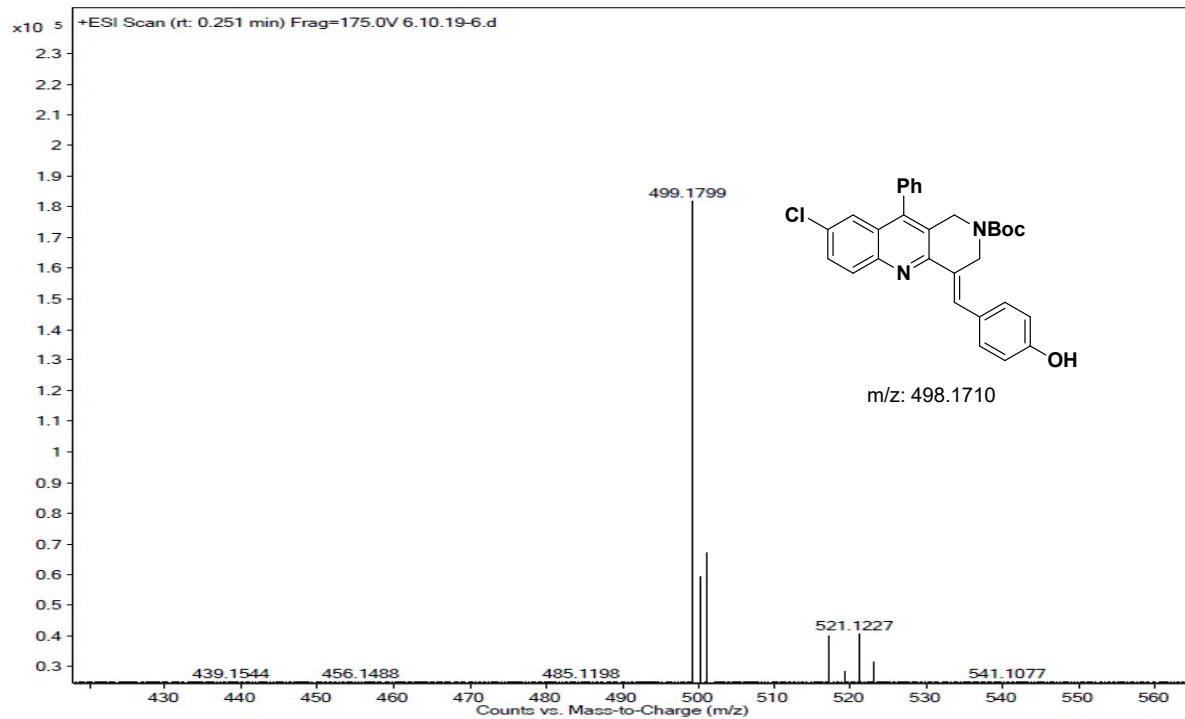

***Tert-butyl-8-chloro-4-(3,4-dimethoxybenzylidene)-10-phenyl-3,4-dihydrobenzo[b][1,6]naphthyridine-2(1H)-carboxylate (8d):***

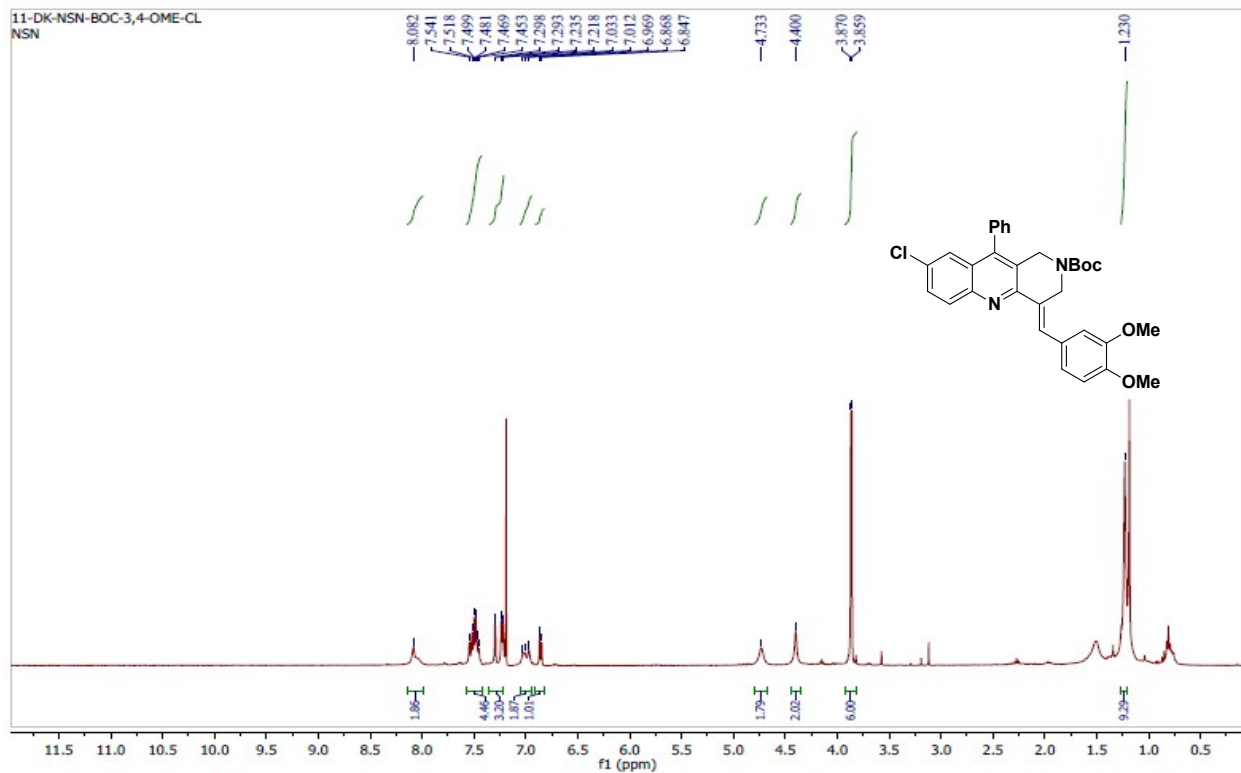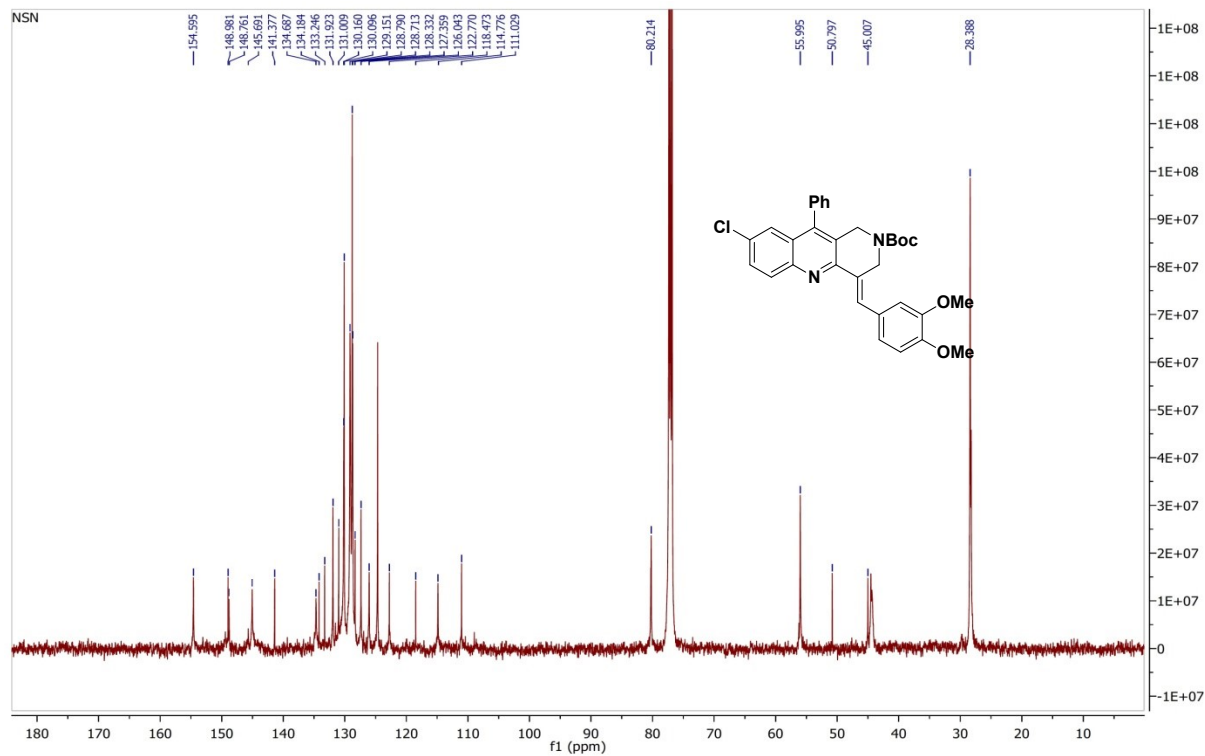



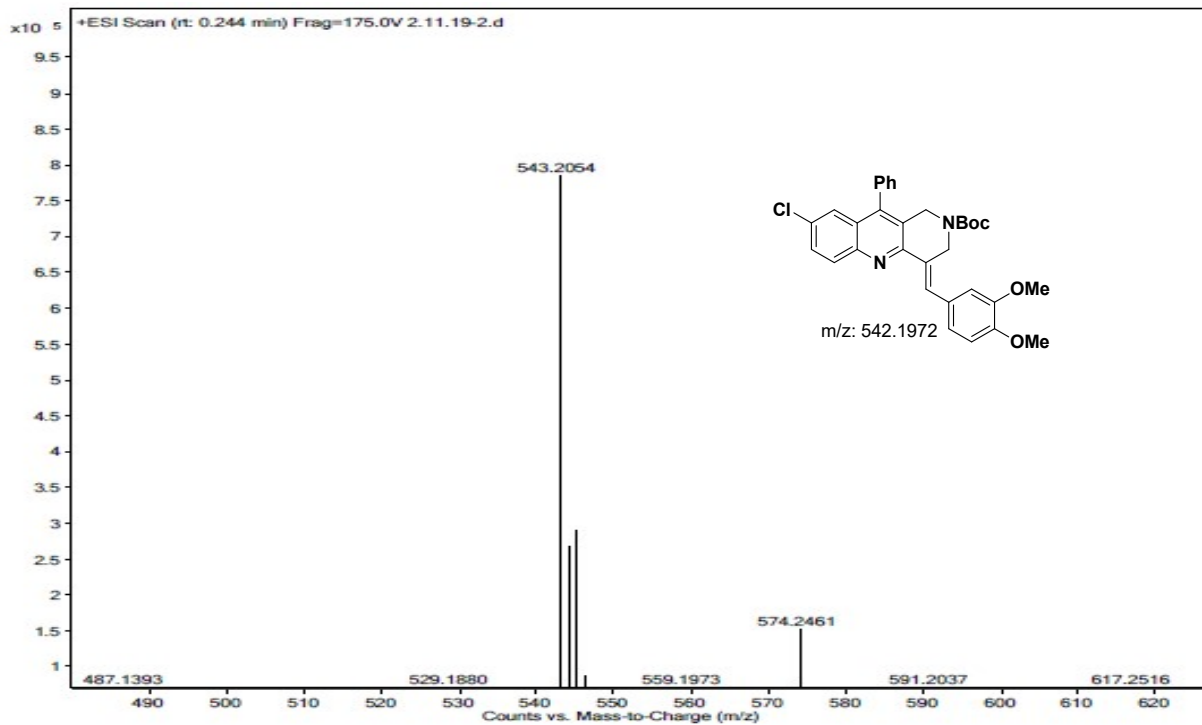

***Tert-butyl-4-(4-bromobenzylidene)-8-chloro-10-phenyl-3,4-dihydrobenzo[b][1,6]naphthyridine-2(1H)-carboxylate (8e):***

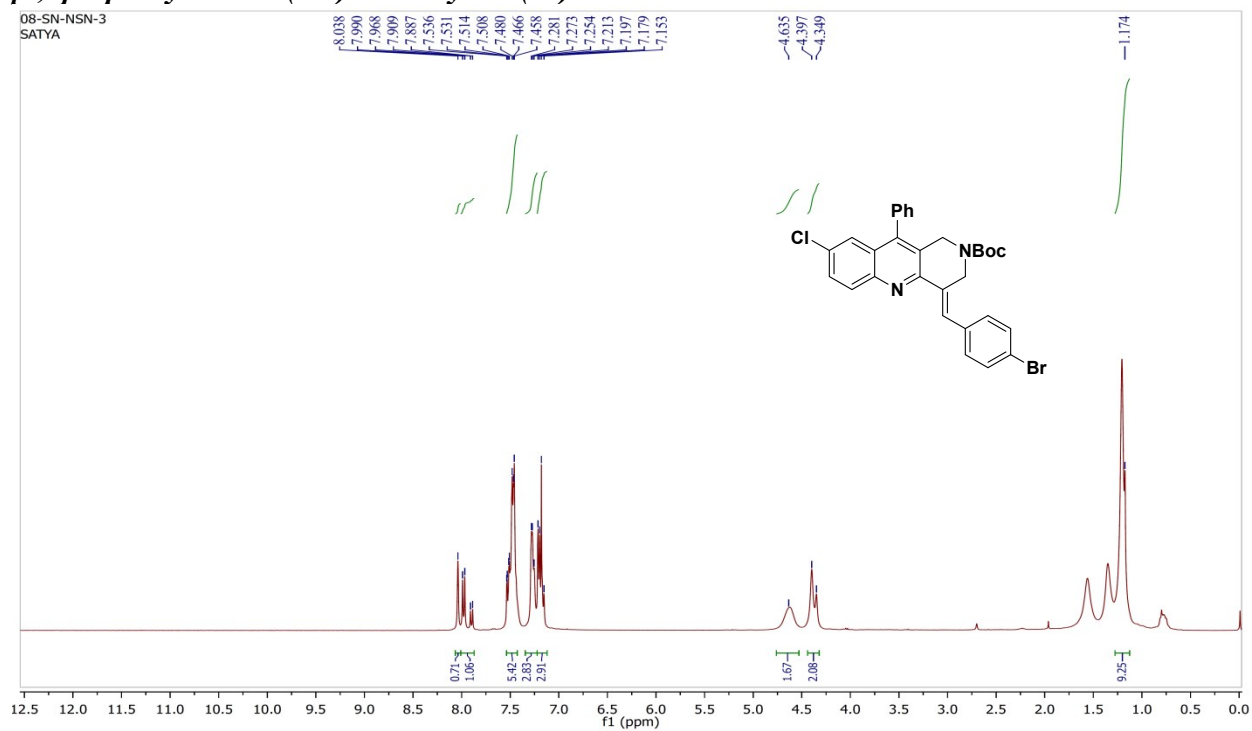

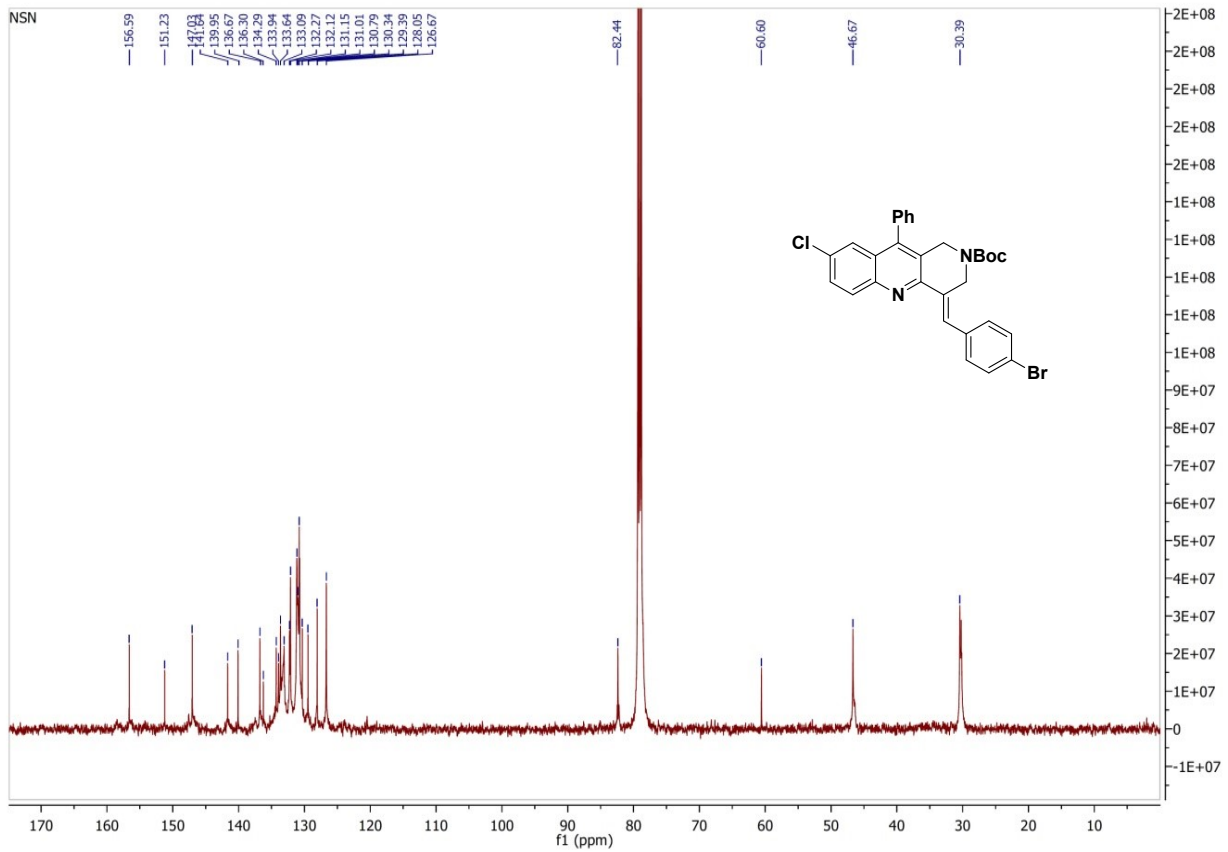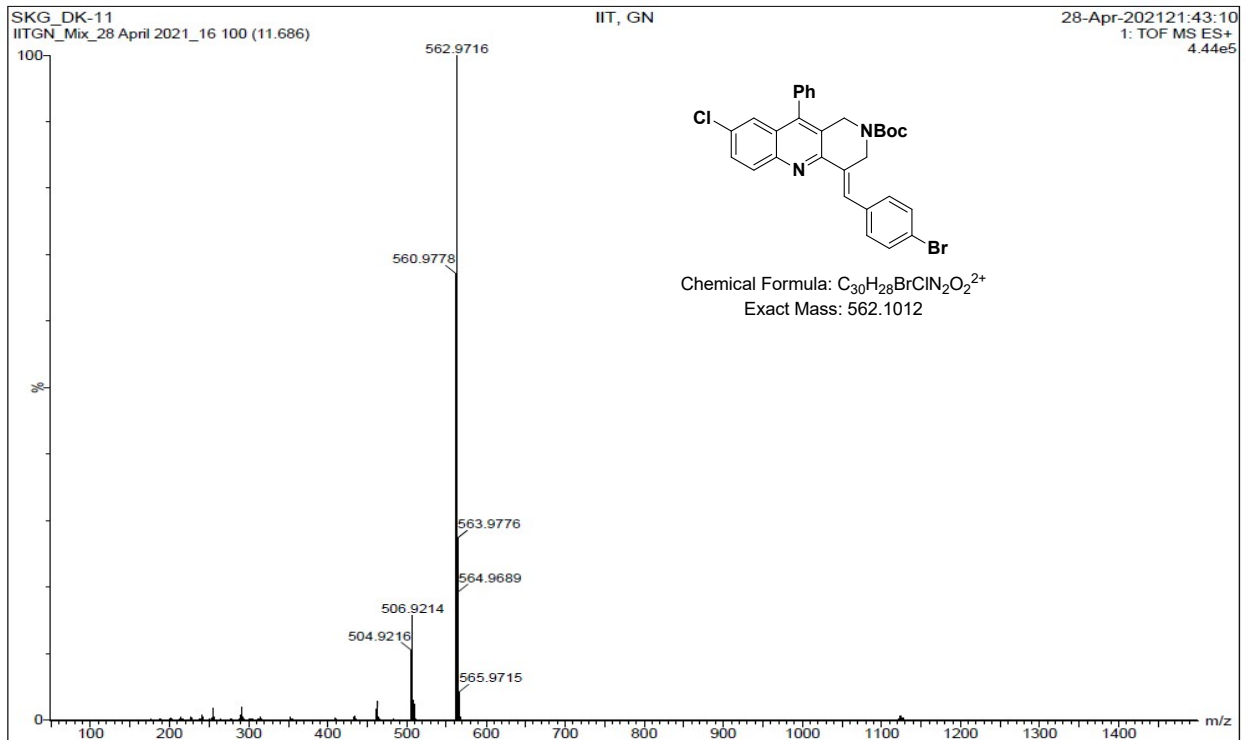

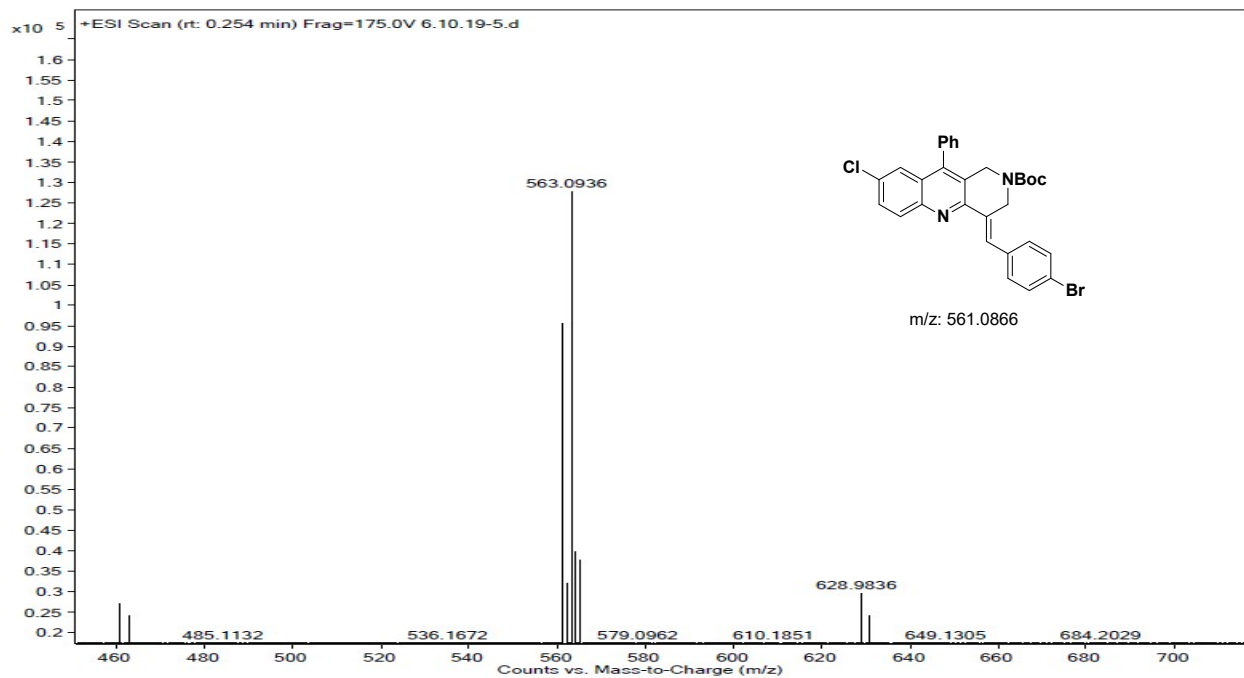

***Tert-butyl-8-chloro-4-(4-nitrobenzylidene)-10-phenyl-3,4-dihydrobenzo[b][1,6]naphthyridine-2(1H)-carboxylate (8f):***

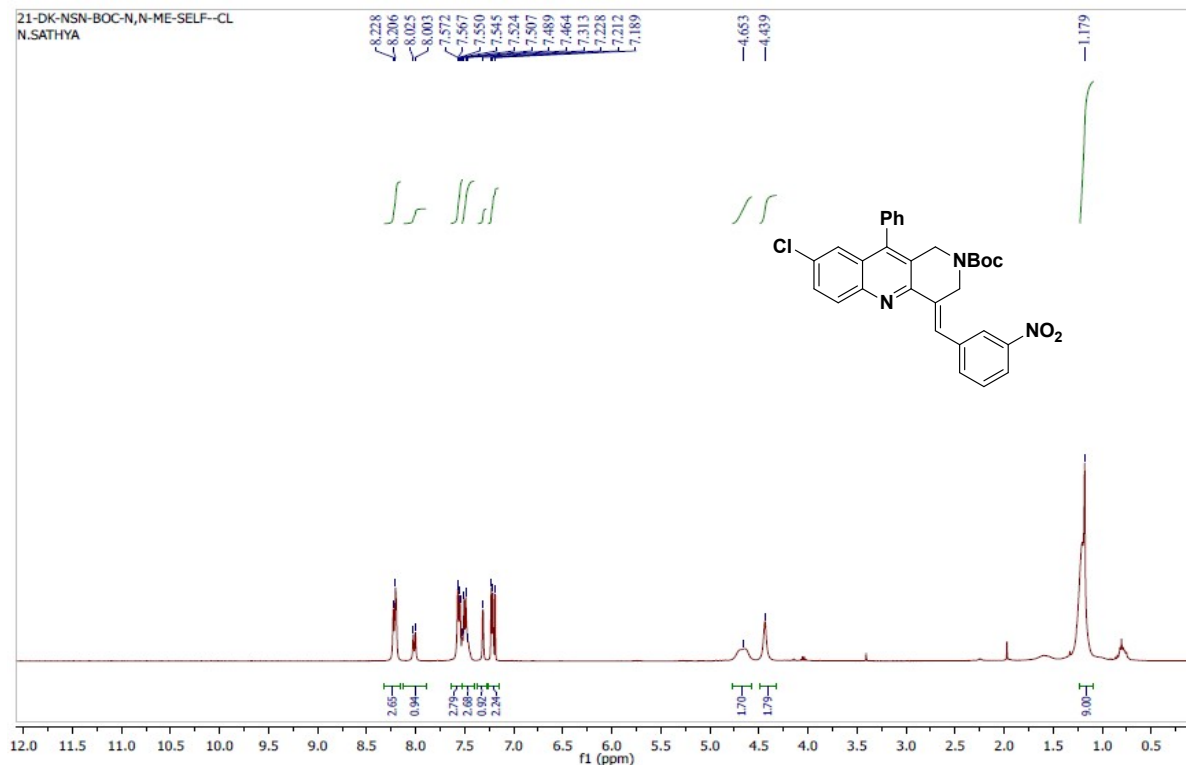

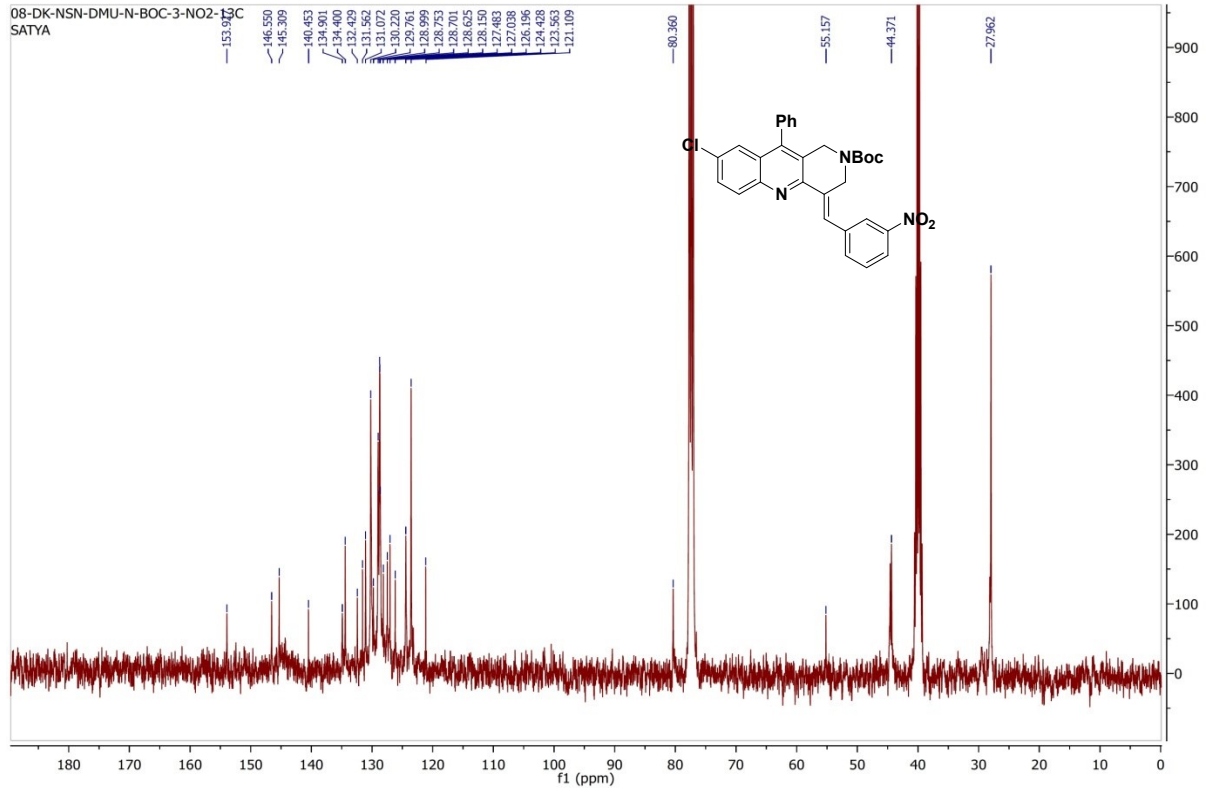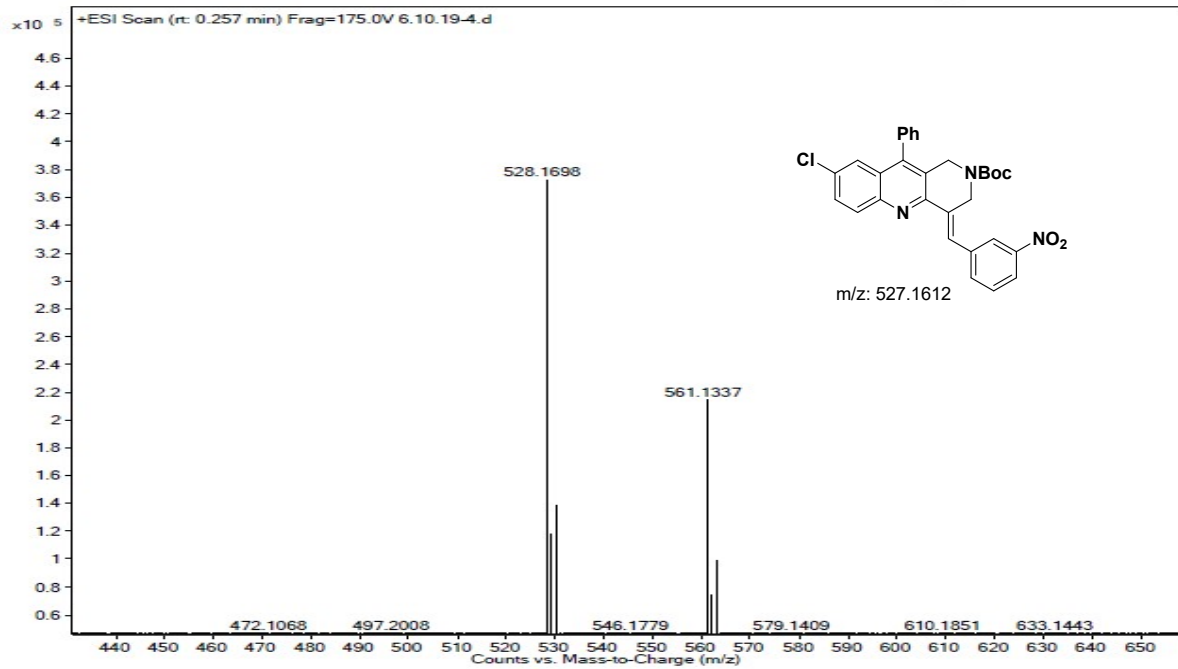

***Tert-butyl-8-chloro-4-(4-(dimethylamino)benzylidene)-10-phenyl-3,4-dihydrobenzo[b][1,6]naphthyridine-2(1H)-carboxylate (8g):***

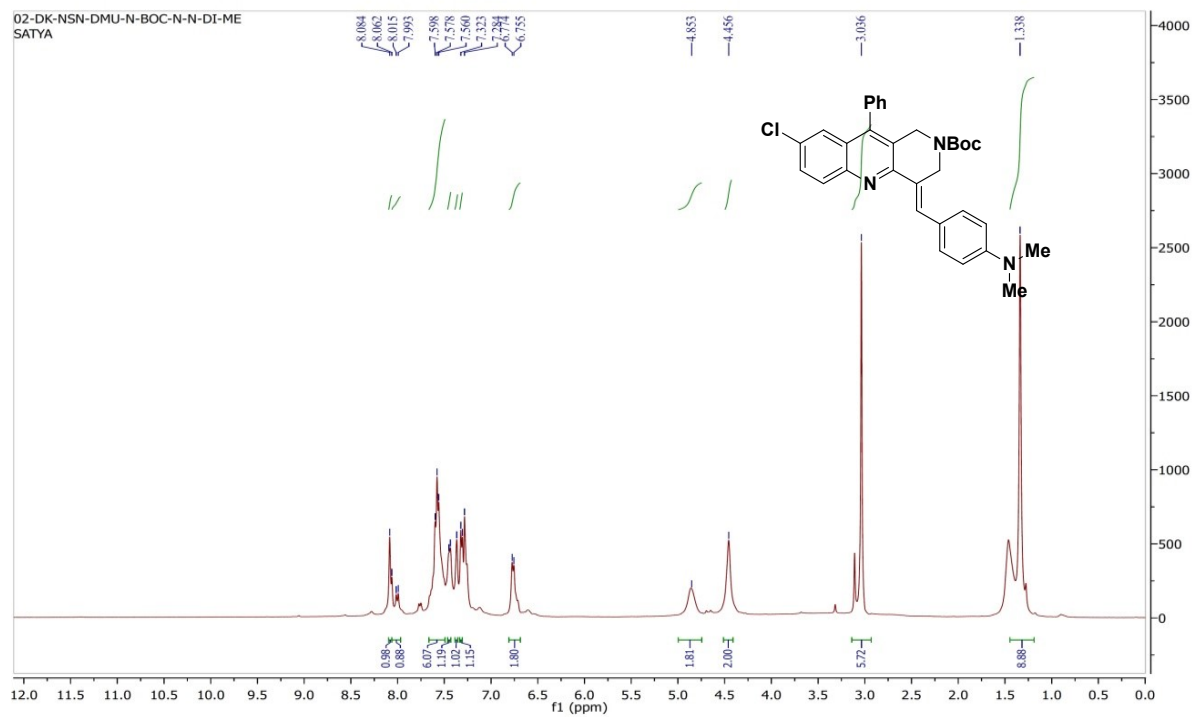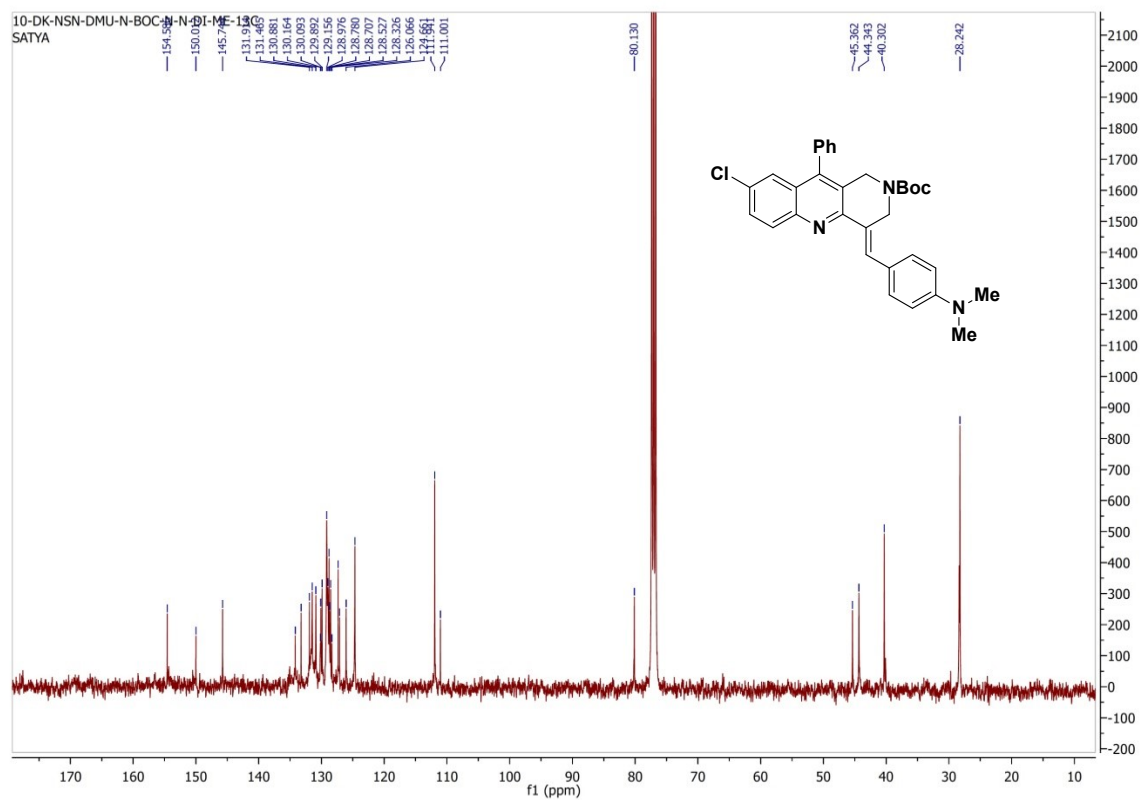

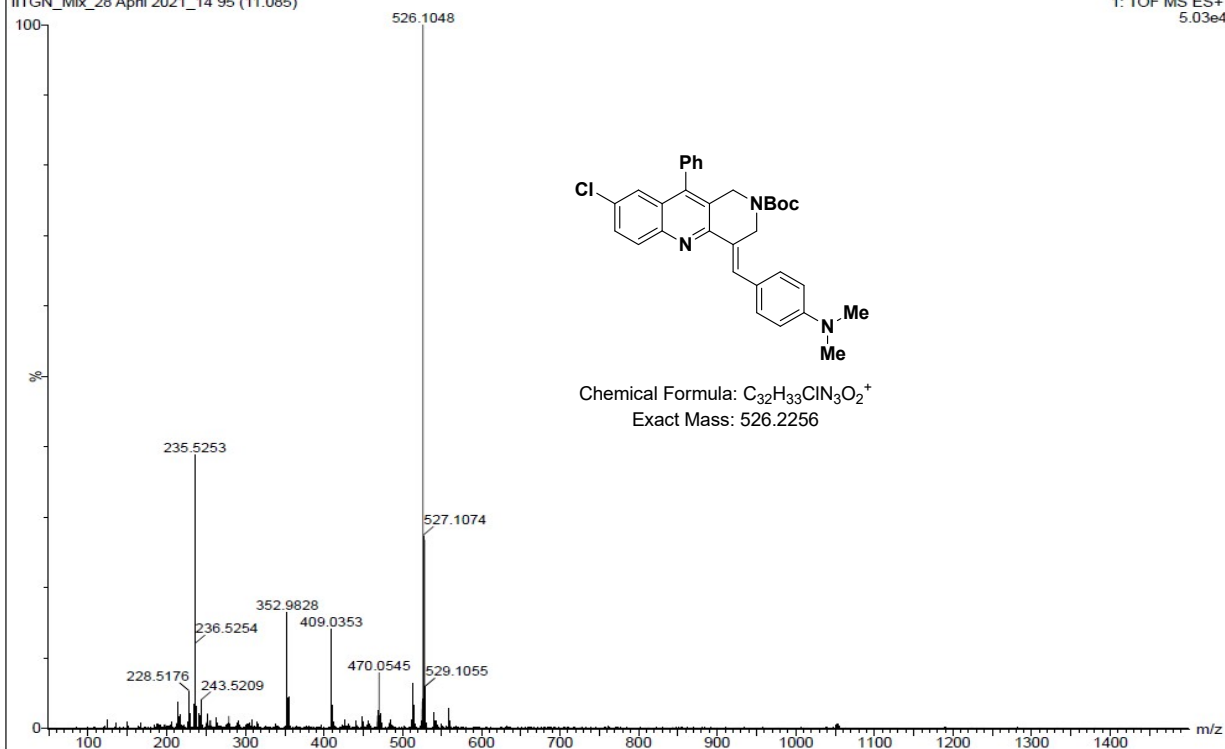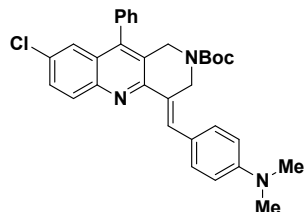

Chemical Formula: C<sub>32</sub>H<sub>33</sub>ClN<sub>3</sub>O<sub>2</sub><sup>+</sup>  
Exact Mass: 526.2256

**NOESY of the compound 7h:**

**7-chloro-4-(4-chlorobenzylidene)-9-phenyl-1,2,3,4-tetrahydroacridine (7h):**

sample code: nx-7h-hex

selective band center: 2.94 (ppm); width: 30.7 (Hz)

VARIAN 400MHz NMR

solvent: cdcl3

date: sep 30 2021

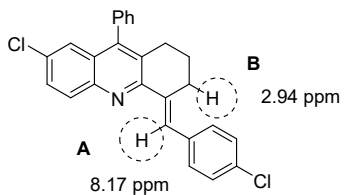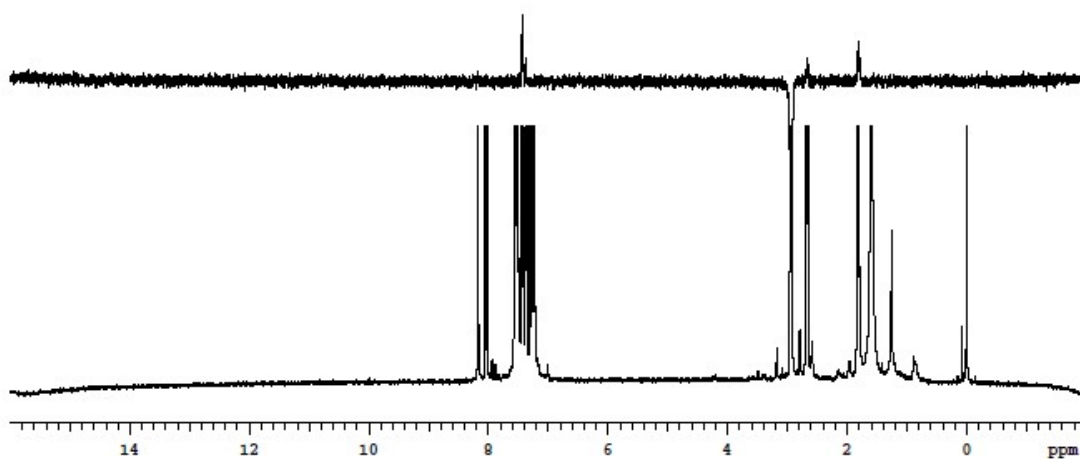

plotname: nx-7h-hex\_nmrvid\_01\_plot01

**NOESY of the compound 8a:**

**Tert-butyl-8-chloro-4-(4-methylbenzylidene)-10-phenyl-3,4-dihydrobenzo[b][1,6] naphthyridin-2(1H)-carboxylate (8a):**

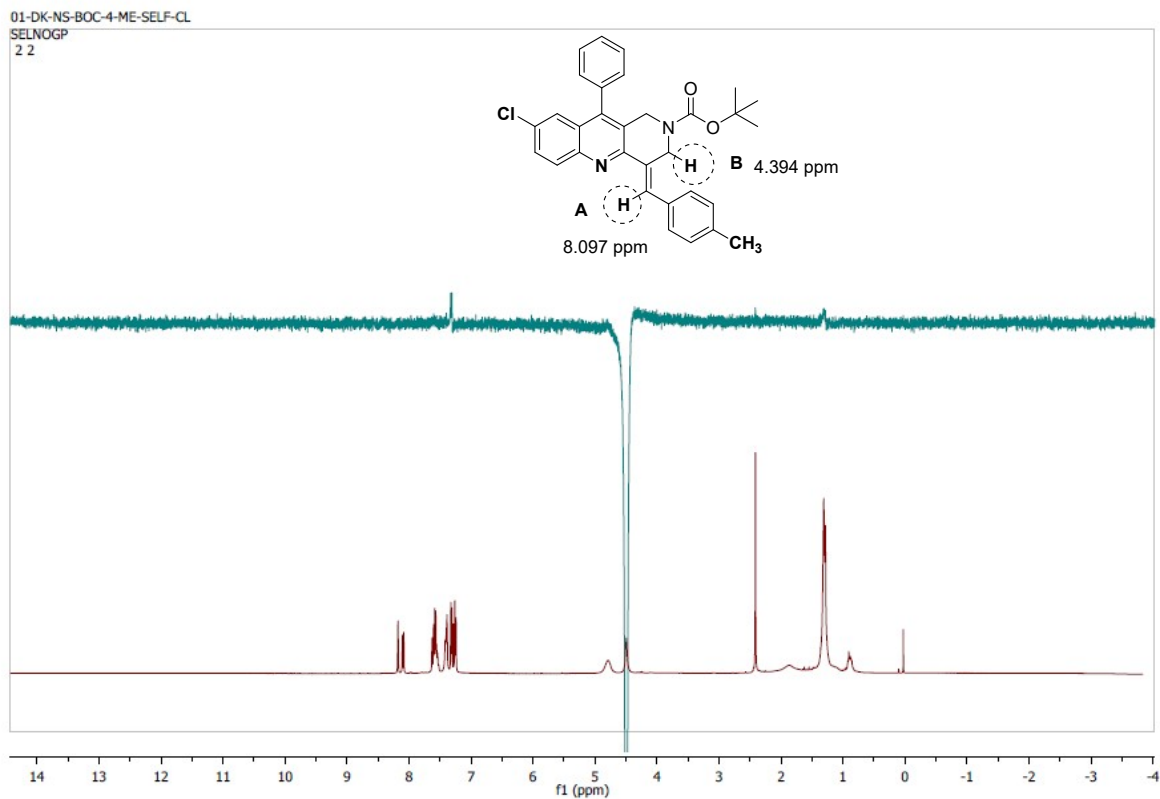



***COSY of the compound 8a:***

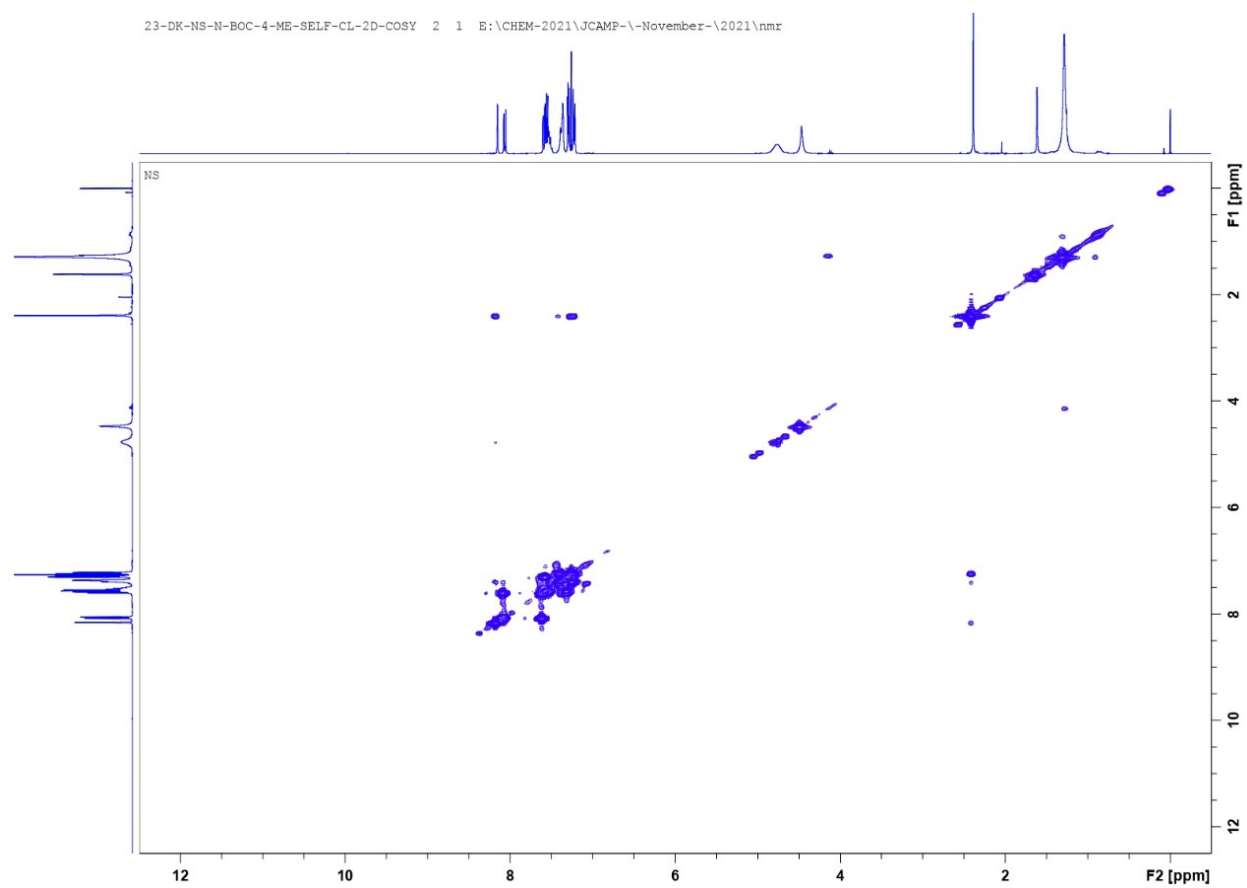

***COSY of the compound 5m:***

***Ethyl-6-chloro-2-(3-nitrostyryl)-4-phenylquinoline-3-carboxylate (5m):***

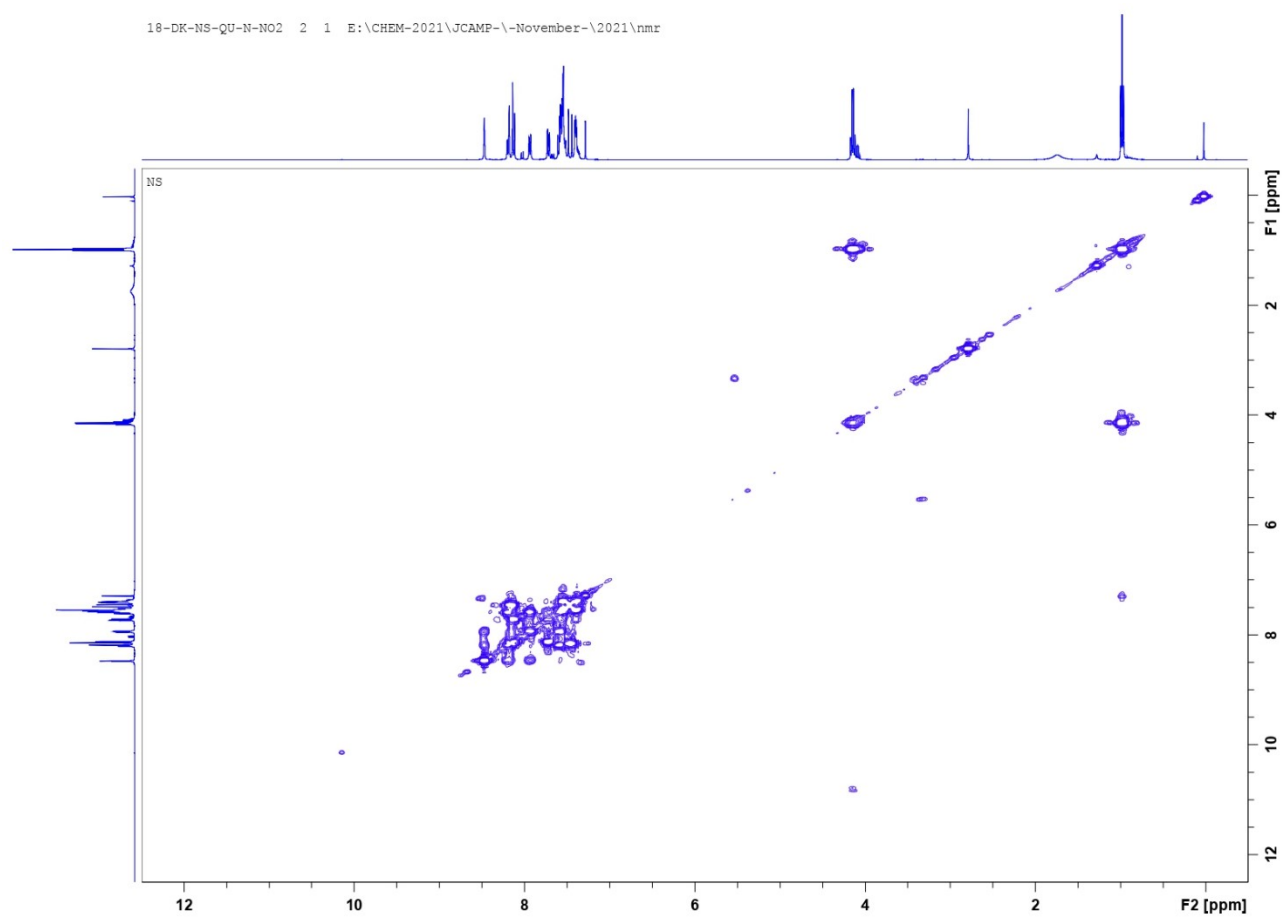

**Table-S1:** Photo physical properties data of the resulting acyclic/aliphatic compounds (**5a-6h**):

| Compounds | $\lambda_{\text{Abs}}$ (nm) | $\lambda_{\text{em}}$ (nm) | Stokes shift<br>( $\Delta\lambda$ nm) |
|-----------|-----------------------------|----------------------------|---------------------------------------|
| 5n        | 375                         | 557                        | 182                                   |
| 5o        | 426                         | 488                        | 65                                    |
| 5p        | 425                         | 525                        | 100                                   |
| 6b        | 394                         | 502                        | 108                                   |
| 6f        | 458                         | 548                        | 90                                    |
| 6h        | 400                         | 484                        | 84                                    |

**Table-S2:** Photo physical properties data of the resulting cyclic compounds (**7a-8d**):

| Compounds | $\lambda_{\text{Abs}}$ (nm) | $\lambda_{\text{em}}$ (nm) | Stokes shift<br>( $\Delta\lambda$ nm) |
|-----------|-----------------------------|----------------------------|---------------------------------------|
| 7a        | 441                         | 494                        | 53                                    |
| 7b        | 420                         | 551                        | 131                                   |
| 7c        | 536                         | 644                        | 108                                   |
| 7d        | 411                         | 464                        | 53                                    |
| 8a        | 400                         | 464                        | 64                                    |
| 8c        | 390                         | 449                        | 59                                    |
| 8d        | 420                         | 558                        | 138                                   |

**Table-S3:** Data of the solvatochromic effect of compound **7e** in various solvents.

| solvent           | $\lambda_{\text{Abs}}$ (nm) | $\lambda_{\text{em}}$ (nm) | Stokes shift<br>( $\Delta\lambda$ nm) |
|-------------------|-----------------------------|----------------------------|---------------------------------------|
| <i>n</i> -Hexane  | 456                         | 543                        | 87                                    |
| DCM               | 498                         | 568                        | 70                                    |
| CHCl <sub>3</sub> | 488                         | 553                        | 65                                    |
| Acetone           | 485                         | 585                        | 100                                   |
| MeOH              | 496                         | 597                        | 101                                   |
| MeCN              | 470                         | 618                        | 148                                   |
| DMF               | 514                         | 601                        | 87                                    |
| DMSO              | 511                         | 605                        | 94                                    |
