# Supplementary material for: Metal-free, one-pot synthesis of 2-styrylquinolines via Friedländer annulation and sp3 C–H activation using 1,3-dimethylurea and l-tartaric acid (3 : 1) as a deep eutectic solvent
Source: Royal Society of Chemistry journal article supplement (doi:10.1039/d1nj00132a), 2021-12-10
Supplement: d1nj00132a2.pdf [file d1nj00132a2.pdf]

## 1. Detailed computational methodology

In the present investigation, an attempt has been made to understand the reaction mechanism with the aid of density functional theory (DFT) calculations. Geometries of all the reactants, TSs, intermediates and products were fully optimized without any geometrical/symmetrical constraints using DFT based B3 exchange and Lee, Yong and Paar (LYP) correlation functional with inclusion empirical dispersion correction (D3) as suggested by Grimme's utilizing 6-31G\* basis set.<sup>1-3</sup> The energetics of various reactions were calculated at 298.15 K temperature and 1 atm pressure in gaseous phase.

### Catalyst Investigation

Both the forms of catalyst were investigated in order to understand the stability of catalyst. The geometries of both complexes were optimized using B3LYP-D3 employing 6-31+G\* level of theory. The H-bond interaction energies (IEs) of various complexes were calculated using following equation.

$$IE = E_{\text{complex}} - \sum E_{\text{monomer}}$$

where,  $E_{\text{complex}}$  and  $E_{\text{monomer}}$  are the energy of complex and the energy of monomeric units, respectively. The energies of the monomers were calculated from the respective monomer geometries in the complexes, or in other words, the energy that results from complexation was taken into account. The calculated IEs were corrected for basis set superposition error using the counterpoise method suggested by Boys and Bernardi.<sup>4</sup>

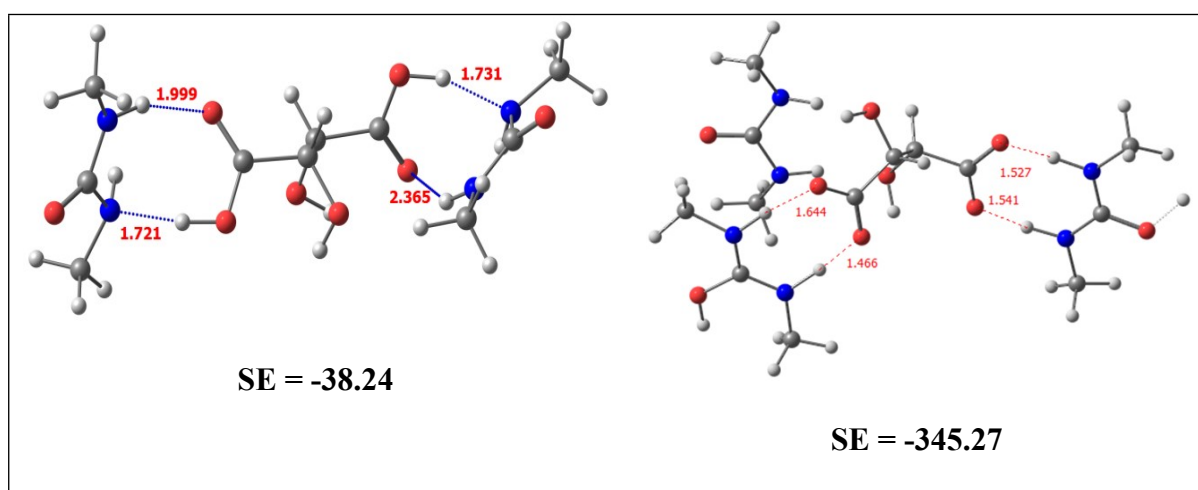

Figure S1. Optimized geometries of both complexes.

It can be noted that the H-bonded complex involved proton from LT to DMU is more stable when compared to non-proton transferred complex. Therefore, in the present investigation proton transferred form of catalyst considered.

### **Reaction mechanism**

To support the results of the present investigation and proposed mechanism, theoretical calculations were performed using density functional theory (DFT) based B3LYP method employing 6-31+G\* basis set. For an ease in the calculation the reaction is considered in three stages, which are a) keto-enol tautomerism of the carbonyl compound in the presence of the DES, b) reaction of the enolic form of the ketone with the activated benzophenone compound to give a thermodynamically stable intermediate E and c) reaction of the activated tautomer of stable intermediate with the activated aldehydic compound via aldol condensation to give final products.

#### **a) Reaction mechanism of enolization**

Close analysis of geometries of various transition states clearly reveals that the enolization of cyclohexanone undergoes concerted reaction mechanism in the presence of DES as catalyst *via* proton transfer between DES mixture to cyclohexanone. It can be observed from the optimized geometries where DES catalyst also provides the stabilizing environment for various transition states. It is worth to note that the gas-phase conversion of cyclohexanone to cyclohexanol requires 67.7 kcal/mol energy. The same conversion in the presence of DES occurs at 25.65 kcal/mol. The difference in energy clearly indicates the part played by the catalyst in the reaction. Therefore, presence of the catalyst decreases the energy barrier considerably.

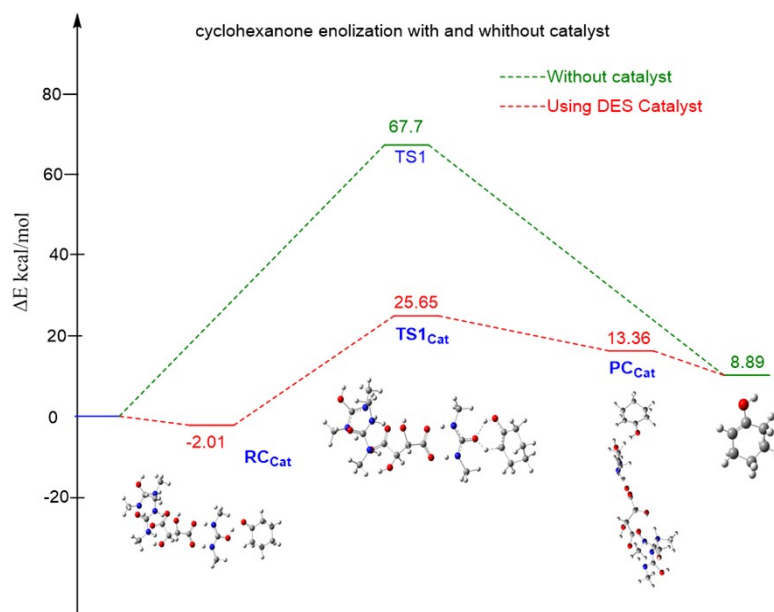

**Fig. S2b.** Optimized geometries and energetics of enolization of cyclohexanone obtained using B3LYP-D3/6-31+G\*\* level of calculations

**b) Mechanism for reaction of activated benzophenone with enolic form**

The carbonyl carbon of benzophenone gets activated by proton transfer from DES which reacts with enolic form of the ketone to give intermediate D *via* TS1. D readily loses water molecule to give D1. From the profile it can be observe that the activation energy for this step is 11.97 kcal/mol. Further, D1 is activated by DES and undergoes cyclization *via* proton transfer to give D2 which dehydrates to give the thermodynamically stable intermediate E. The relative free energy for E is -30.67 kcal/mol which highlights its stability.

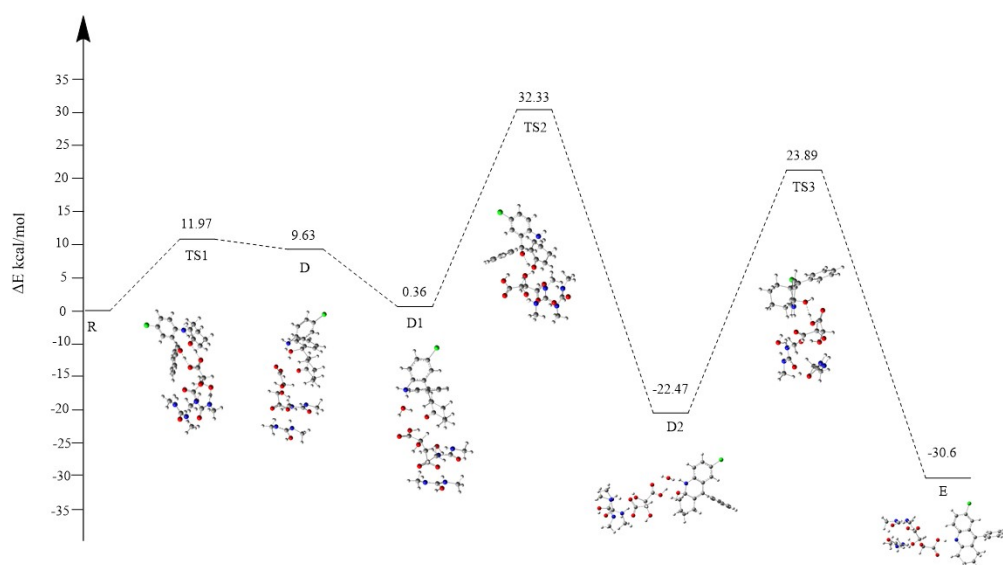

**Fig. S2c.** Optimized geometries and energetics of reaction between activated benzophenone with enolic form obtained using B3LYP-D3/6-31+G\*\* level of calculations

### c) Reaction mechanism of the stable intermediate with activated aldehyde

The tautomeric form of the stable intermediate E obtained from the previous step reacts with the activate aldehydic compound which gives intermediate H *via* TS4. From the profile it can be seen that the relative energy of TS4 was -14.66 kcal/mol which shows that it is a low barrier reaction. Finally, H undergoes dehydration to give the product complex PC *via* TS5. The energy require for this step is 13.03 kcal/mol. From the profile it can be seen that this reaction is energetically feasible.

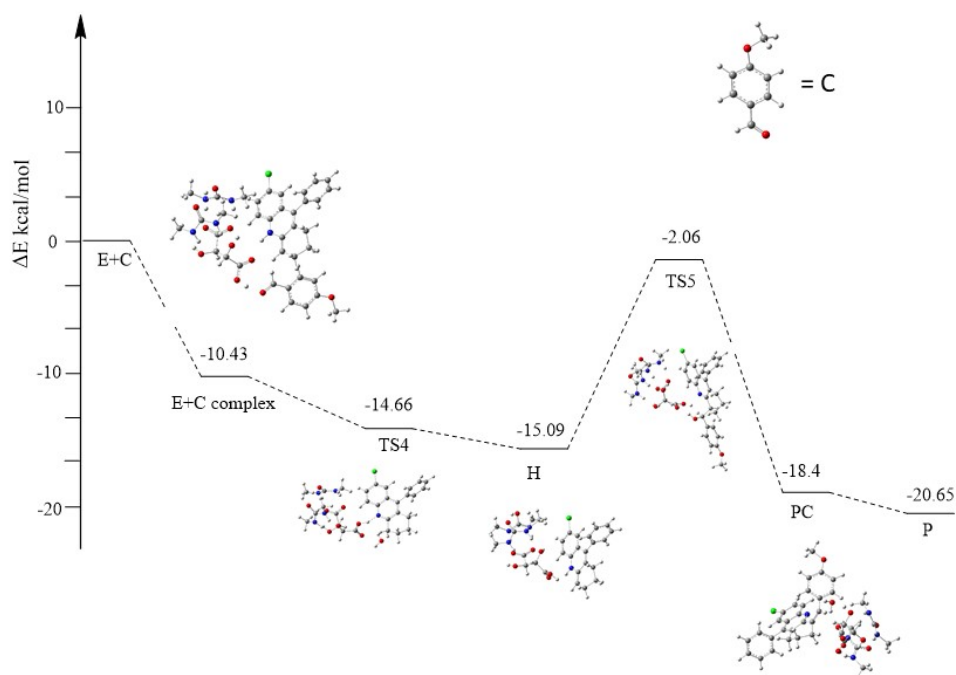

**Fig. S2d.** Optimized geometries and energetics of reaction between stable intermediate with activated aldehyde obtained using B3LYP-D3/6-31+G\*\* level of calculations

It is also worthy to note that the IMs are found to be very stable throughout the reaction. This is because of the hydrogen bonding by the catalytic mixture with the IMs. Hence, the theoretical calculation compliments the proposed mechanism and shows that the use of DES effectively reduces the activation energy and efficiently catalyses the reaction.

### Images and optimized coordinates of the structures obtained in enolization of cyclohexanone

RC

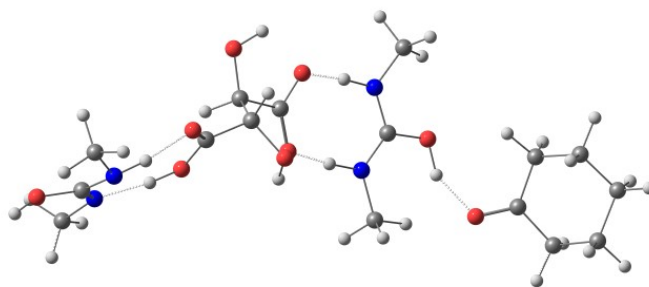

|   |             |             |             |
|---|-------------|-------------|-------------|
| C | -5.60728100 | -0.58625800 | -0.14294600 |
| O | -6.93410400 | -0.76358700 | -0.51101200 |

|   |             |             |             |
|---|-------------|-------------|-------------|
| N | -4.57434000 | -1.23811300 | -0.62643000 |
| N | -5.50206500 | 0.33622600  | 0.89825600  |
| C | -4.72874300 | -2.34964000 | -1.57175900 |
| H | -5.26640800 | -3.21120400 | -1.14298200 |
| H | -5.20861600 | -2.05333700 | -2.51892300 |
| H | -3.70581300 | -2.69689400 | -1.82148800 |
| C | -6.59880800 | 1.31440700  | 1.08259800  |
| H | -6.59609000 | 2.11610700  | 0.32576800  |
| H | -7.58224100 | 0.81024600  | 1.04811800  |
| H | -6.48352800 | 1.77157600  | 2.08148800  |
| H | -4.54358300 | 0.73335100  | 1.04871900  |
| H | -2.98054600 | -0.83261000 | -0.23535200 |
| C | 5.47162700  | -0.58608300 | 0.11815600  |
| O | 6.78254100  | -0.89502000 | 0.38413900  |
| N | 4.45376700  | -1.45093200 | 0.32975900  |
| N | 5.28972700  | 0.64754900  | -0.40463800 |
| C | 4.65834600  | -2.79724300 | 0.88522100  |
| H | 5.27923600  | -3.43477100 | 0.23283700  |
| H | 5.08140900  | -2.77617800 | 1.90465700  |
| H | 3.66329300  | -3.28604500 | 0.96073000  |
| C | 6.41634700  | 1.57794900  | -0.59875900 |
| H | 6.59035900  | 2.18485700  | 0.30905100  |
| H | 7.35643700  | 1.05384900  | -0.84817600 |
| H | 6.16727400  | 2.26173100  | -1.43232400 |
| H | 4.26364800  | 1.01683300  | -0.59011100 |
| H | 3.37015800  | -1.12502100 | 0.10979700  |
| C | 1.84012800  | 0.54145800  | -0.51124000 |
| O | 2.00893100  | -0.65657600 | -0.13592900 |
| O | 2.75009300  | 1.37282100  | -0.74229900 |
| C | -1.82273200 | 0.65774300  | 0.50798800  |
| O | -2.77785000 | 1.30847700  | 0.89152000  |
| O | -1.95693100 | -0.52471500 | -0.10677400 |
| C | -0.34684100 | 1.06264700  | 0.66889700  |
| C | 0.39013600  | 1.02016300  | -0.69519200 |
| H | -0.29301700 | 2.08533600  | 1.12261200  |
| H | -0.14451500 | 0.37238200  | -1.43503300 |
| O | 0.24177300  | 0.22088100  | 1.64254300  |
| H | 0.46513000  | -0.67391400 | 1.24838000  |
| O | 0.35999800  | 2.32067900  | -1.26257500 |
| H | 1.22188000  | 2.79306000  | -1.08761800 |
| H | -7.07053900 | -1.54163400 | -1.09985700 |
| H | 6.91778200  | -1.82539100 | 0.70638600  |
| C | 10.01957051 | -4.03660092 | -2.33280919 |
| C | 9.08343591  | -4.09128041 | -1.12211794 |
| C | 8.47247277  | -2.73832373 | -0.81901667 |
| C | 7.90378170  | -1.96960812 | -1.99430595 |

|   |             |             |             |
|---|-------------|-------------|-------------|
| C | 8.86390273  | -1.95806953 | -3.18726261 |
| C | 9.34317945  | -3.37224546 | -3.53873646 |
| H | 8.26492122  | -4.81874835 | -1.29666377 |
| H | 9.62644005  | -4.46350455 | -0.22906473 |
| H | 10.94120719 | -3.48205475 | -2.06494684 |
| H | 10.34718404 | -5.06063014 | -2.59610199 |
| H | 6.93434043  | -2.42562639 | -2.28044071 |
| H | 7.66344330  | -0.93294811 | -1.68042411 |
| H | 8.36552498  | -1.49650850 | -4.06125952 |
| H | 9.73438267  | -1.31151520 | -2.95722345 |
| H | 8.48886002  | -3.98759987 | -3.88015239 |
| H | 10.04794469 | -3.33063261 | -4.39072072 |
| O | 8.40718118  | -2.30984911 | 0.31159306  |

Zero-point corrected energy = **-1828.980791**

PC

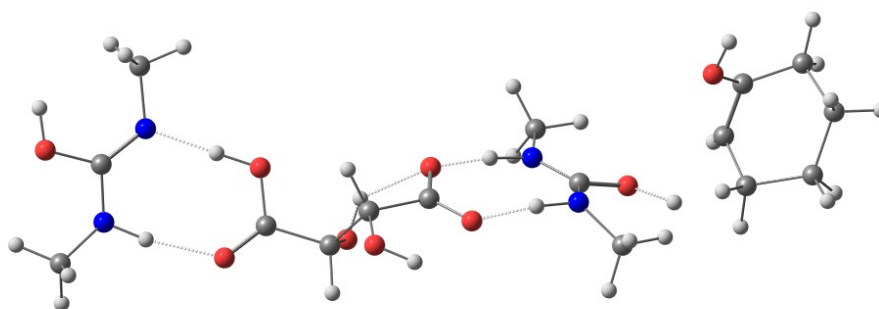

|   |           |          |          |
|---|-----------|----------|----------|
| C | -7.94244  | 0.98576  | 0.12817  |
| O | -9.24665  | 1.30487  | 0.49034  |
| N | -6.85576  | 1.61934  | 0.49792  |
| N | -7.92983  | -0.07709 | -0.77868 |
| C | -6.90296  | 2.86121  | 1.27696  |
| H | -7.39022  | 3.69160  | 0.74043  |
| H | -7.37335  | 2.73873  | 2.26615  |
| H | -5.85015  | 3.16150  | 1.45307  |
| C | -9.08391  | -1.00599 | -0.77950 |
| H | -9.09357  | -1.68710 | 0.08720  |
| H | -10.03617 | -0.44461 | -0.78891 |
| H | -9.03327  | -1.61051 | -1.70234 |
| H | -7.00162  | -0.55327 | -0.88788 |
| H | -5.23823  | 1.00513  | 0.14091  |
| C | 3.15607   | -0.25880 | -0.48346 |
| O | 4.36287   | -0.21037 | -1.00850 |
| N | 2.23094   | 0.64413  | -0.87727 |
| N | 2.87249   | -1.16599 | 0.53652  |
| C | 2.58650   | 1.74020  | -1.79747 |

|   |          |          |          |
|---|----------|----------|----------|
| H | 3.68148  | 1.86146  | -1.89847 |
| H | 2.16564  | 1.54467  | -2.80068 |
| H | 2.16189  | 2.68717  | -1.41851 |
| C | 3.70879  | -2.37556 | 0.63541  |
| H | 3.35223  | -3.19910 | -0.01036 |
| H | 4.77696  | -2.15050 | 0.36433  |
| H | 3.69066  | -2.72523 | 1.68615  |
| H | 1.82924  | -1.30198 | 0.83560  |
| H | 1.19174  | 0.57854  | -0.53140 |
| C | -0.57374 | -0.75793 | 0.55598  |
| O | -0.30161 | 0.28707  | -0.08906 |
| O | 0.25352  | -1.59442 | 0.99465  |
| C | -4.26682 | -0.68451 | -0.38062 |
| O | -5.29500 | -1.27290 | -0.66302 |
| O | -4.27072 | 0.58455  | 0.06128  |
| C | -2.84417 | -1.26378 | -0.48544 |
| C | -2.06064 | -1.05698 | 0.83461  |
| H | -2.91490 | -2.35266 | -0.73983 |
| H | -2.50819 | -0.24568 | 1.45937  |
| O | -2.22151 | -0.68064 | -1.61359 |
| H | -1.80598 | 0.20613  | -1.37513 |
| O | -2.19488 | -2.24417 | 1.60718  |
| H | -1.33089 | -2.74905 | 1.60267  |
| H | -9.31334 | 2.16341  | 0.96657  |
| H | 6.66585  | 1.84741  | 2.06244  |
| C | 7.02726  | -0.65593 | -0.55926 |
| C | 6.75194  | 0.76746  | -0.87482 |
| C | 7.19463  | 1.59704  | 0.14301  |
| C | 8.61992  | 1.88740  | 0.35596  |
| C | 9.08916  | 0.43830  | 0.75703  |
| C | 8.51114  | -0.74201 | -0.06877 |
| H | 6.68961  | 1.07479  | -1.90372 |
| H | 5.24001  | -1.04086 | -0.26973 |
| H | 6.30349  | -1.08637 | 0.23875  |
| H | 6.91830  | -1.28669 | -1.46786 |
| H | 9.12832  | 2.22546  | -0.56910 |
| H | 8.86829  | 2.62047  | 1.13949  |
| H | 10.19302 | 0.41115  | 0.68028  |
| H | 8.84588  | 0.28258  | 1.82577  |
| H | 9.13337  | -0.85098 | -0.98193 |
| H | 8.64671  | -1.67160 | 0.51344  |
| O | 6.33372  | 1.43323  | 1.23158  |

Zero-point corrected energy = **-1828.962695**

**TS1**



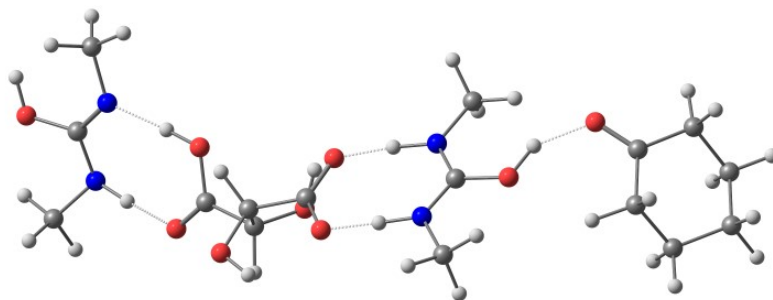

|   |          |          |          |
|---|----------|----------|----------|
| C | -7.83766 | -1.18180 | -0.07500 |
| O | -9.19079 | -1.36714 | -0.33172 |
| N | -6.86604 | -1.23058 | -0.95533 |
| N | -7.61383 | -1.01656 | 1.29357  |
| C | -7.09791 | -1.61436 | -2.35210 |
| H | -7.45950 | -2.64967 | -2.46309 |
| H | -7.77777 | -0.93017 | -2.88562 |
| H | -6.11477 | -1.55726 | -2.86172 |
| C | -8.73416 | -0.52727 | 2.13019  |
| H | -8.94214 | 0.54648  | 1.99194  |
| H | -9.66009 | -1.08982 | 1.91016  |
| H | -8.47045 | -0.70205 | 3.18834  |
| H | -6.68329 | -0.60290 | 1.54380  |
| H | -5.23193 | -0.79704 | -0.56162 |
| C | 3.07185  | 0.92867  | -0.87606 |
| O | 4.42101  | 0.80659  | -0.89806 |
| N | 2.23848  | -0.12145 | -1.08623 |
| N | 2.60610  | 2.18476  | -0.66471 |
| C | 2.73032  | -1.48458 | -1.34522 |
| H | 3.83204  | -1.54588 | -1.44908 |
| H | 2.42532  | -2.15822 | -0.52155 |
| H | 2.27823  | -1.86444 | -2.28177 |
| C | 3.52435  | 3.31185  | -0.42414 |
| H | 3.74337  | 3.42245  | 0.65318  |
| H | 4.48032  | 3.19394  | -0.96401 |
| H | 3.03783  | 4.24093  | -0.77667 |
| H | 1.52260  | 2.36070  | -0.54733 |
| H | 1.13299  | 0.01608  | -1.01731 |
| C | -0.75251 | 1.43677  | -0.46033 |
| O | -0.36630 | 0.28875  | -0.80748 |
| O | -0.02262 | 2.44841  | -0.30953 |
| C | -4.13169 | 0.21666  | 0.79805  |
| O | -5.05728 | 0.31143  | 1.58364  |
| O | -4.25659 | -0.40857 | -0.38298 |
| C | -2.71087 | 0.76608  | 1.01906  |
| C | -2.25570 | 1.62844  | -0.18587 |
| H | -2.69462 | 1.36393  | 1.96640  |

|   |          |          |           |
|---|----------|----------|-----------|
| H | -2.85037 | 1.40169  | -1.10555  |
| O | -1.85474 | -0.32877 | 1.28353   |
| H | -1.55798 | -0.76445 | 0.42690   |
| O | -2.54228 | 2.98749  | 0.11504   |
| H | -1.70120 | 3.46629  | 0.36528   |
| H | -9.36904 | -1.67913 | -1.24835  |
| H | 4.76302  | -0.17426 | -1.11066  |
| C | 8.55499  | -2.36088 | 1.14173   |
| C | 7.98398  | -2.24699 | -0.27664  |
| C | 6.94982  | -1.15812 | -0.37515  |
| C | 7.24310  | 0.16980  | 0.26920   |
| C | 7.82951  | 0.00132  | 1.67532   |
| C | 8.99382  | -0.99615 | 1.68525   |
| H | 8.79802  | -2.03400 | -1.00371  |
| H | 7.55198  | -3.21866 | -0.60018  |
| H | 7.79674  | -2.81053 | 1.81443   |
| H | 9.41074  | -3.06446 | 1.14045   |
| H | 7.95021  | 0.73410  | -0.37723  |
| H | 6.32379  | 0.80024  | 0.30661   |
| H | 8.16666  | 0.98557  | 2.05608   |
| H | 7.03582  | -0.33471 | 2.37312   |
| H | 9.83874  | -0.60172 | 1.08811   |
| H | 9.38222  | -1.10979 | 2.71645   |
| O | 5.90984  | -1.34979 | -0.998273 |

Zero-point corrected energy = **-1828.94311**

**Images and optimized coordinates of the structures obtained reaction between reaction of activated benzophenone with enolic form**

**TS1**

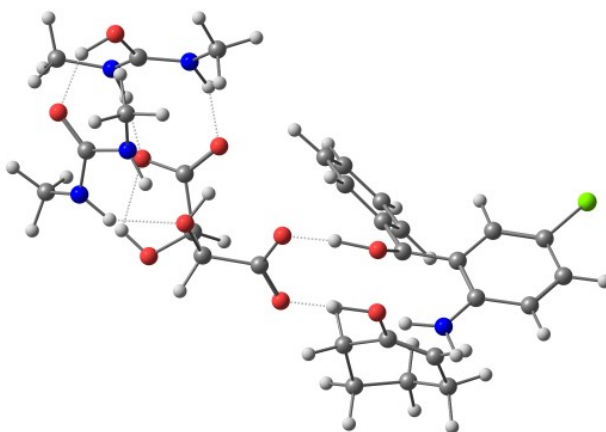

|   |          |          |         |
|---|----------|----------|---------|
| C | -6.85054 | -2.36284 | 0.95945 |
| C | -6.25475 | -1.77539 | 2.05419 |
| C | -4.93112 | -1.23537 | 1.95812 |

|    |          |          |          |
|----|----------|----------|----------|
| C  | -4.24488 | -1.26997 | 0.70479  |
| C  | -4.87045 | -1.89745 | -0.39110 |
| C  | -6.14502 | -2.42324 | -0.25987 |
| H  | -7.85637 | -2.78363 | 1.02519  |
| H  | -6.78084 | -1.73075 | 3.00489  |
| H  | -4.34463 | -1.98514 | -1.34750 |
| Cl | -6.89631 | -3.17918 | -1.61368 |
| C  | -2.87473 | -0.73103 | 0.55628  |
| O  | -2.09039 | -1.07031 | 1.56843  |
| C  | -2.27003 | -0.49745 | -0.79168 |
| C  | -0.94577 | -0.89452 | -1.03501 |
| C  | -3.00069 | 0.12709  | -1.81723 |
| C  | -0.35014 | -0.64592 | -2.27350 |
| H  | -0.36118 | -1.38720 | -0.24795 |
| C  | -2.40938 | 0.35600  | -3.06062 |
| H  | -4.03071 | 0.44797  | -1.63848 |
| C  | -1.08158 | -0.02454 | -3.28901 |
| H  | 0.70096  | -0.91618 | -2.42508 |
| H  | -2.98141 | 0.83777  | -3.85233 |
| H  | -0.61736 | 0.16835  | -4.25610 |
| N  | -4.35139 | -0.70170 | 3.08448  |
| H  | -4.87094 | -0.57886 | 3.93327  |
| H  | -3.43490 | -0.26133 | 3.03101  |
| H  | -0.98576 | -0.73627 | 1.51463  |
| C  | 5.52612  | -1.65465 | -1.23018 |
| O  | 6.48293  | -2.39030 | -0.61414 |
| N  | 4.27324  | -2.18467 | -1.25168 |
| N  | 5.84945  | -0.54649 | -1.95821 |
| C  | 3.95040  | -3.37535 | -0.43985 |
| H  | 3.11729  | -3.91485 | -0.92665 |
| H  | 4.81078  | -4.06448 | -0.36205 |
| H  | 3.63641  | -3.09261 | 0.58211  |
| C  | 7.25012  | -0.08402 | -2.02114 |
| H  | 7.30827  | 0.77725  | -2.70982 |
| H  | 7.63211  | 0.23881  | -1.02711 |
| H  | 7.91334  | -0.87768 | -2.40830 |
| H  | 5.08792  | 0.19279  | -2.15697 |
| H  | 3.44513  | -1.55691 | -1.53722 |
| C  | 2.90748  | 0.91641  | -1.08191 |
| O  | 2.46248  | -0.24908 | -1.16947 |
| O  | 4.01626  | 1.31360  | -1.52589 |
| C  | 0.39364  | 1.04267  | 1.30843  |
| O  | -0.59984 | 1.82214  | 1.22381  |
| O  | 0.30050  | -0.20483 | 1.51356  |
| C  | 1.80642  | 1.61318  | 1.13532  |
| C  | 2.06870  | 1.98521  | -0.34423 |

|   |          |          |          |
|---|----------|----------|----------|
| H | 1.97311  | 2.50708  | 1.78739  |
| H | 1.11226  | 2.18529  | -0.88451 |
| O | 2.73359  | 0.64362  | 1.62310  |
| H | 2.51837  | -0.25077 | 1.21689  |
| O | 2.76315  | 3.23096  | -0.33238 |
| H | 3.66412  | 3.11979  | -0.75705 |
| H | 7.10755  | -1.76812 | -0.01318 |
| C | 5.97164  | -0.04709 | 1.48673  |
| O | 7.03287  | -0.40596 | 0.93155  |
| N | 5.54380  | 1.27904  | 1.48838  |
| N | 5.14504  | -0.98434 | 2.14064  |
| C | 6.17408  | 2.22307  | 0.53708  |
| H | 7.25622  | 2.02254  | 0.44621  |
| H | 5.71506  | 2.16220  | -0.47186 |
| H | 6.04699  | 3.24883  | 0.92397  |
| C | 5.75972  | -2.25484 | 2.58887  |
| H | 6.26229  | -2.75219 | 1.73568  |
| H | 6.51145  | -2.11156 | 3.38407  |
| H | 4.97200  | -2.92836 | 2.96380  |
| H | 4.39054  | -0.63506 | 2.74198  |
| H | 4.54458  | 1.47691  | 1.68218  |
| C | -2.90682 | 3.04499  | -0.07770 |
| C | -3.77474 | 4.26777  | -0.40654 |
| C | -5.09088 | 3.84750  | -1.07514 |
| C | -5.90697 | 2.91705  | -0.16229 |
| C | -5.06978 | 1.84920  | 0.47582  |
| C | -3.73422 | 1.94497  | 0.50712  |
| H | -5.68798 | 4.74125  | -1.33290 |
| H | -3.99015 | 4.83153  | 0.52237  |
| H | -3.21337 | 4.95839  | -1.06299 |
| H | -2.39213 | 2.67397  | -0.99084 |
| H | -2.08190 | 3.33248  | 0.61572  |
| H | -6.39629 | 3.51017  | 0.63971  |
| H | -6.72987 | 2.45220  | -0.74196 |
| H | -5.61043 | 1.01857  | 0.91702  |
| H | -4.87516 | 3.33479  | -2.03215 |
| O | -2.99776 | 0.94179  | 1.16343  |
| H | -1.87456 | 1.28444  | 1.27491  |

Zero-point corrected energy = **-2616.640276**

**D**

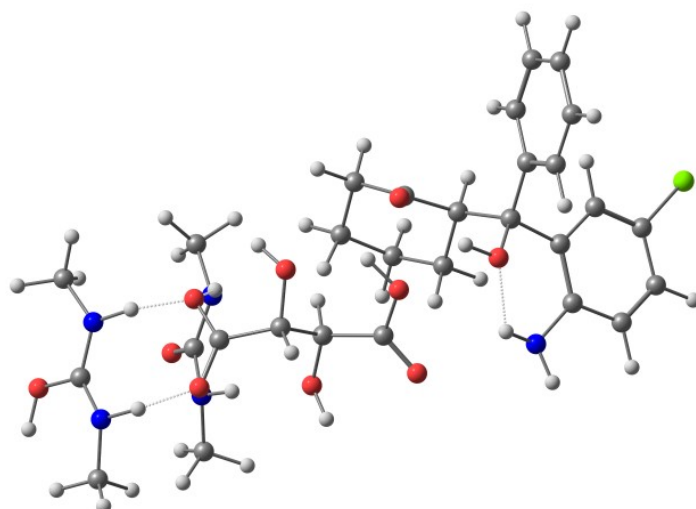

|    |          |          |          |
|----|----------|----------|----------|
| C  | 6.36485  | -3.04435 | 0.71164  |
| C  | 5.27375  | -2.91309 | 1.55579  |
| C  | 4.34418  | -1.84609 | 1.39125  |
| C  | 4.57385  | -0.86764 | 0.38093  |
| C  | 5.67709  | -1.02400 | -0.46794 |
| C  | 6.54521  | -2.10049 | -0.30547 |
| H  | 7.07086  | -3.86607 | 0.83392  |
| H  | 5.11578  | -3.64148 | 2.34788  |
| H  | 5.87454  | -0.29574 | -1.25857 |
| Cl | 7.88866  | -2.26951 | -1.37840 |
| C  | 3.68322  | 0.35162  | 0.18011  |
| O  | 3.06511  | 0.59786  | 1.44926  |
| C  | 4.51891  | 1.59274  | -0.15855 |
| C  | 5.10473  | 2.29820  | 0.90358  |
| C  | 4.72694  | 2.03088  | -1.47257 |
| C  | 5.87947  | 3.43318  | 0.65419  |
| H  | 4.94567  | 1.94985  | 1.92798  |
| C  | 5.50378  | 3.16683  | -1.72079 |
| H  | 4.29194  | 1.49082  | -2.31196 |
| C  | 6.07975  | 3.87067  | -0.65921 |
| H  | 6.32850  | 3.97606  | 1.48434  |
| H  | 5.66081  | 3.50213  | -2.74408 |
| H  | 6.68339  | 4.75486  | -0.85376 |
| N  | 3.17763  | -1.88641 | 2.16089  |
| H  | 3.20908  | -2.40586 | 3.02555  |
| H  | 2.60924  | -1.03369 | 2.23631  |
| H  | 2.43577  | 1.38193  | 1.40814  |
| C  | -7.16145 | 0.26503  | -0.17126 |
| O  | -8.17047 | -0.31460 | -0.88440 |
| N  | -7.07173 | 0.11274  | 1.19115  |
| N  | -6.40460 | 1.13007  | -0.87522 |
| C  | -7.64925 | -1.08346 | 1.83756  |

|   |          |          |          |
|---|----------|----------|----------|
| H | -8.64852 | -1.33457 | 1.44565  |
| H | -6.98334 | -1.97294 | 1.73646  |
| H | -7.75899 | -0.86465 | 2.91924  |
| C | -6.68142 | 1.38580  | -2.30172 |
| H | -6.33961 | 0.54108  | -2.93288 |
| H | -7.76121 | 1.52953  | -2.49221 |
| H | -6.14762 | 2.30249  | -2.60949 |
| H | -5.46723 | 1.52158  | -0.44442 |
| H | -6.16841 | 0.49195  | 1.67298  |
| C | -3.79393 | 1.32316  | 1.32226  |
| O | -4.64506 | 0.86402  | 2.10129  |
| O | -3.99227 | 1.66606  | 0.11621  |
| C | -0.14099 | 0.34478  | 2.20152  |
| O | 0.27987  | -0.54148 | 2.90365  |
| O | 0.57697  | 1.48929  | 2.07998  |
| C | -1.46782 | 0.28856  | 1.42884  |
| C | -2.34685 | 1.49910  | 1.82478  |
| H | -1.27329 | 0.26898  | 0.31380  |
| H | -2.33169 | 1.70600  | 2.92064  |
| O | -2.12617 | -0.94564 | 1.65401  |
| H | -2.10144 | -1.18949 | 2.61593  |
| O | -1.74526 | 2.64988  | 1.23424  |
| H | -2.13220 | 2.80835  | 0.32603  |
| H | -8.73914 | -0.93322 | -0.33547 |
| C | -4.38393 | -1.56304 | -1.44084 |
| O | -4.90254 | -2.31281 | -2.25947 |
| N | -3.53619 | -0.49741 | -1.81315 |
| N | -4.62580 | -1.68878 | -0.03923 |
| C | -3.43774 | -0.17332 | -3.25480 |
| H | -2.36210 | -0.14179 | -3.52815 |
| H | -3.91502 | -0.95845 | -3.87528 |
| H | -3.89758 | 0.79412  | -3.50170 |
| C | -5.04852 | -3.03858 | 0.41462  |
| H | -5.78533 | -2.91250 | 1.23265  |
| H | -5.53282 | -3.59873 | -0.40989 |
| H | -4.20818 | -3.64819 | 0.78347  |
| H | -3.93103 | -1.26103 | 0.59895  |
| H | -3.43746 | 0.31431  | -1.18259 |
| C | 0.56793  | 1.01786  | -2.14316 |
| C | -0.17149 | -0.31511 | -1.96661 |
| C | 0.80553  | -1.48532 | -1.80695 |
| C | 1.82474  | -1.23985 | -0.68699 |
| C | 2.59444  | 0.07952  | -0.90484 |
| C | 1.53823  | 1.16920  | -0.99077 |
| H | 0.24017  | -2.41473 | -1.59221 |
| H | -0.84156 | -0.25712 | -1.07457 |

|   |          |          |          |
|---|----------|----------|----------|
| H | -0.85014 | -0.49004 | -2.83012 |
| H | 1.10351  | 1.04410  | -3.11148 |
| H | -0.14275 | 1.86650  | -2.16911 |
| H | 1.32741  | -1.23018 | 0.30414  |
| H | 2.54173  | -2.08588 | -0.63991 |
| H | 3.12526  | 0.00599  | -1.89029 |
| H | 1.33267  | -1.67127 | -2.76276 |
| O | 1.39551  | 2.04700  | -0.16187 |
| H | 0.15310  | 2.21391  | 1.48759  |

Zero-point corrected energy = **-2616.644012**

**D1**

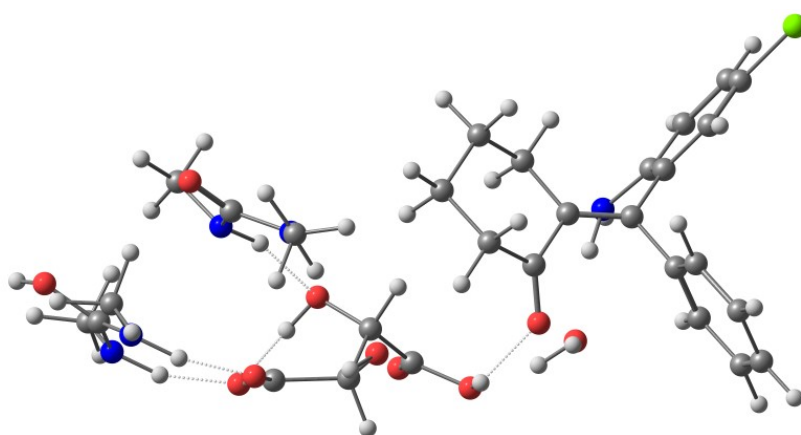

|    |         |          |          |
|----|---------|----------|----------|
| C  | 6.96130 | -2.26028 | 1.85036  |
| C  | 6.00544 | -1.56331 | 2.57762  |
| C  | 4.99791 | -0.81502 | 1.91445  |
| C  | 4.98635 | -0.77297 | 0.49116  |
| C  | 5.96252 | -1.46910 | -0.23083 |
| C  | 6.92760 | -2.20671 | 0.45208  |
| H  | 7.73193 | -2.84036 | 2.35969  |
| H  | 6.02269 | -1.59801 | 3.66469  |
| H  | 5.96639 | -1.42986 | -1.32177 |
| Cl | 8.11758 | -3.07319 | -0.44934 |
| C  | 3.97359 | 0.01637  | -0.24394 |
| O  | 2.68785 | 2.29257  | 1.91707  |
| C  | 4.51730 | 1.21212  | -0.93827 |
| C  | 4.90347 | 2.34045  | -0.20067 |
| C  | 4.66529 | 1.19802  | -2.33357 |
| C  | 5.43078 | 3.45301  | -0.86154 |
| H  | 4.78083 | 2.35466  | 0.88571  |
| C  | 5.19836 | 2.31278  | -2.98610 |
| H  | 4.37107 | 0.32057  | -2.90495 |
| C  | 5.58051 | 3.44054  | -2.25221 |
| H  | 5.72446 | 4.33209  | -0.28927 |
| H  | 5.31601 | 2.30269  | -4.06819 |

|   |          |          |          |
|---|----------|----------|----------|
| H | 5.99357  | 4.30826  | -2.76294 |
| N | 3.98381  | -0.21063 | 2.66958  |
| H | 4.18702  | -0.02277 | 3.64109  |
| H | 3.44377  | 0.54987  | 2.23616  |
| H | 1.91816  | 2.62029  | 2.39800  |
| C | -7.25612 | -0.24884 | 0.28438  |
| O | -8.18093 | -1.25244 | 0.31689  |
| N | -6.90584 | 0.43029  | 1.43215  |
| N | -6.88388 | 0.13185  | -0.95193 |
| C | -7.02334 | -0.25324 | 2.73768  |
| H | -8.04882 | -0.60819 | 2.92949  |
| H | -6.31006 | -1.10338 | 2.83558  |
| H | -6.77704 | 0.48233  | 3.53100  |
| C | -7.36378 | -0.59464 | -2.14449 |
| H | -6.77639 | -1.53379 | -2.29345 |
| H | -8.42805 | -0.87614 | -2.05936 |
| H | -7.23633 | 0.04871  | -3.03155 |
| H | -6.03600 | 0.80622  | -1.07519 |
| H | -6.04899 | 1.10247  | 1.36518  |
| C | -3.99481 | 1.69100  | 0.07389  |
| O | -4.50634 | 1.63574  | 1.21384  |
| O | -4.57396 | 1.50620  | -1.02590 |
| C | -0.76505 | 1.99216  | 1.83139  |
| O | -0.83070 | 2.07003  | 3.02860  |
| O | 0.19120  | 2.74779  | 1.20448  |
| C | -1.63760 | 1.11654  | 0.91916  |
| C | -2.47963 | 1.98079  | -0.04087 |
| H | -0.99804 | 0.38975  | 0.32989  |
| H | -2.29160 | 3.07298  | 0.07598  |
| O | -2.42024 | 0.25905  | 1.72661  |
| H | -3.09785 | 0.79471  | 2.25824  |
| O | -2.04230 | 1.59464  | -1.35310 |
| H | -2.77899 | 1.78461  | -2.00976 |
| H | -8.56327 | -1.41069 | 1.22823  |
| C | -4.30535 | -1.89419 | -0.99499 |
| O | -5.10828 | -2.67596 | -1.49945 |
| N | -3.32729 | -1.21496 | -1.75689 |
| N | -4.32090 | -1.61132 | 0.39664  |
| C | -3.53131 | -1.18993 | -3.22582 |
| H | -2.54712 | -1.10639 | -3.71611 |
| H | -4.00268 | -2.13285 | -3.56554 |
| H | -4.16741 | -0.35210 | -3.55313 |
| C | -4.84076 | -2.68109 | 1.28163  |
| H | -5.33964 | -2.20842 | 2.15050  |
| H | -5.58093 | -3.30558 | 0.74321  |
| H | -4.04658 | -3.34923 | 1.65340  |



|   |          |          |          |
|---|----------|----------|----------|
| H | -3.52410 | -1.09013 | 0.80542  |
| H | -2.93377 | -0.33441 | -1.38926 |
| C | 0.64629  | -0.13963 | -1.84693 |
| C | 0.04804  | -1.37033 | -1.15493 |
| C | 1.14478  | -2.30173 | -0.62924 |
| C | 2.10439  | -1.57740 | 0.32539  |
| C | 2.67306  | -0.32909 | -0.29412 |
| C | 1.63202  | 0.53167  | -0.92525 |
| H | 0.68846  | -3.16684 | -0.11023 |
| H | -0.61019 | -1.03730 | -0.31831 |
| H | -0.61721 | -1.91256 | -1.85642 |
| H | 1.15476  | -0.42766 | -2.78923 |
| H | -0.15933 | 0.57291  | -2.13983 |
| H | 1.58884  | -1.31097 | 1.27359  |
| H | 2.91894  | -2.26962 | 0.63048  |
| H | 2.43801  | 2.34142  | 0.97320  |
| H | 1.71676  | -2.72609 | -1.47812 |
| O | 1.52564  | 1.71742  | -0.64534 |
| H | 0.23557  | 2.66824  | 0.19387  |

Zero-point corrected energy = **-2616.658786**

**TS2**

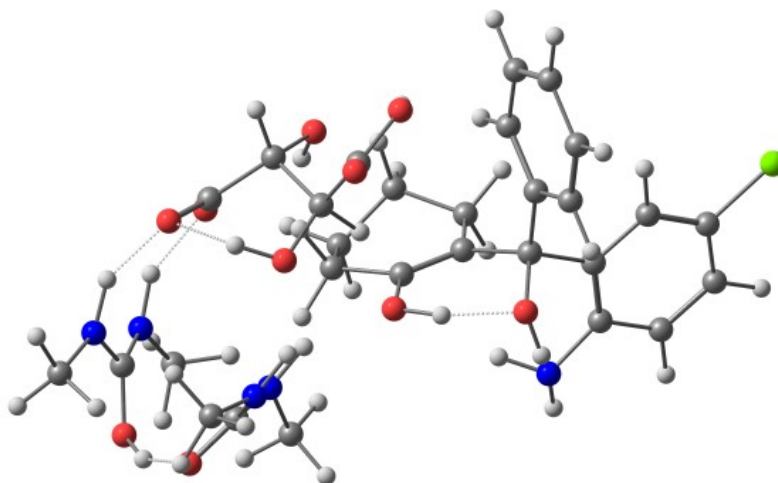

|   |         |          |         |
|---|---------|----------|---------|
| C | 6.77032 | -2.10320 | 1.06673 |
| C | 5.61934 | -2.84743 | 1.30486 |
| C | 4.34217 | -2.27968 | 1.09566 |
| C | 4.21773 | -0.93709 | 0.64845 |
| C | 5.38633 | -0.20541 | 0.40494 |
| C | 6.63701 | -0.78949 | 0.60978 |
| H | 7.75816 | -2.53667 | 1.22989 |
| H | 5.70855 | -3.87156 | 1.66303 |
| H | 5.33065 | 0.83177  | 0.05484 |

|    |          |          |          |
|----|----------|----------|----------|
| Cl | 8.05650  | 0.13484  | 0.29401  |
| C  | 2.85765  | -0.27769 | 0.45589  |
| O  | 2.17829  | -0.24827 | 1.76148  |
| C  | 2.94231  | 1.20832  | 0.11298  |
| C  | 2.89631  | 1.65310  | -1.21497 |
| C  | 3.07612  | 2.14309  | 1.15173  |
| C  | 2.99273  | 3.01807  | -1.50093 |
| H  | 2.78131  | 0.94178  | -2.03341 |
| C  | 3.16171  | 3.50699  | 0.86350  |
| H  | 3.10440  | 1.79634  | 2.18741  |
| C  | 3.12389  | 3.94692  | -0.46373 |
| H  | 2.96564  | 3.35798  | -2.53540 |
| H  | 3.25266  | 4.22939  | 1.67377  |
| H  | 3.18382  | 5.01176  | -0.68761 |
| N  | 3.19565  | -3.05016 | 1.44091  |
| H  | 3.37180  | -4.03878 | 1.57952  |
| H  | 2.38110  | -2.91177 | 0.84572  |
| H  | 0.55377  | -0.15182 | 1.36945  |
| C  | -5.11197 | -1.78760 | -0.61099 |
| O  | -5.39301 | -2.67363 | 0.36240  |
| N  | -5.80976 | -0.62398 | -0.74175 |
| N  | -4.23775 | -2.19717 | -1.57817 |
| C  | -6.95980 | -0.32565 | 0.13240  |
| H  | -7.42286 | 0.62005  | -0.20128 |
| H  | -7.72309 | -1.12245 | 0.06879  |
| H  | -6.67036 | -0.21320 | 1.19815  |
| C  | -3.45951 | -3.43992 | -1.40796 |
| H  | -3.92094 | -4.12400 | -0.67238 |
| H  | -3.42213 | -3.96324 | -2.38156 |
| H  | -2.41922 | -3.21678 | -1.08628 |
| H  | -3.81821 | -1.46827 | -2.24165 |
| H  | -5.38615 | 0.19294  | -1.30018 |
| C  | -3.03009 | 0.95615  | -1.93344 |
| O  | -4.14500 | 1.30343  | -1.47244 |
| O  | -2.73947 | -0.14203 | -2.45573 |
| C  | -1.08757 | 3.63372  | -0.02607 |
| O  | -1.59361 | 4.46028  | 0.68380  |
| O  | 0.05708  | 3.98086  | -0.69814 |
| C  | -1.57312 | 2.19807  | -0.27675 |
| C  | -1.88062 | 1.98132  | -1.77922 |
| H  | -0.80320 | 1.45772  | 0.07616  |
| H  | -2.13175 | 2.92918  | -2.30903 |
| O  | -2.69423 | 1.95309  | 0.55651  |
| H  | -3.55511 | 2.21767  | 0.08805  |
| O  | -0.68214 | 1.52171  | -2.39176 |
| H  | -0.74315 | 0.52246  | -2.54562 |

|   |          |          |          |
|---|----------|----------|----------|
| H | -5.48585 | -2.18389 | 1.33438  |
| C | -4.15997 | -0.34120 | 2.23019  |
| O | -5.13949 | -1.10144 | 2.43082  |
| N | -3.05201 | -0.77626 | 1.47506  |
| N | -4.16115 | 0.95909  | 2.70710  |
| C | -2.54391 | -2.14328 | 1.73900  |
| H | -2.24342 | -2.29554 | 2.78935  |
| H | -3.31987 | -2.89227 | 1.49376  |
| H | -1.65642 | -2.31497 | 1.10046  |
| C | -5.40070 | 1.54730  | 3.25565  |
| H | -6.08903 | 0.75586  | 3.61089  |
| H | -5.14579 | 2.18693  | 4.11970  |
| H | -5.92955 | 2.16148  | 2.50731  |
| H | -3.42323 | 1.62475  | 2.43700  |
| H | -2.31442 | -0.08951 | 1.24063  |
| C | -0.32005 | -1.69424 | -1.38476 |
| C | 0.40190  | -2.56276 | -2.41916 |
| C | 1.69544  | -1.88386 | -2.88502 |
| C | 2.65439  | -1.65587 | -1.70703 |
| C | 1.97440  | -1.02679 | -0.51880 |
| C | 0.62868  | -1.08222 | -0.40197 |
| H | 2.19060  | -2.49604 | -3.66163 |
| H | 0.63122  | -3.55660 | -1.99048 |
| H | -0.26581 | -2.74488 | -3.28383 |
| H | -0.88675 | -0.86777 | -1.90319 |
| H | -1.11843 | -2.27136 | -0.86174 |
| H | 3.11091  | -2.62052 | -1.40543 |
| H | 3.50273  | -1.02005 | -2.03975 |
| H | 2.37940  | -1.04644 | 2.30047  |
| H | 1.45699  | -0.91561 | -3.36894 |
| O | -0.07592 | -0.56635 | 0.65545  |
| H | 0.43898  | 3.26372  | -1.28438 |

Zero-point corrected energy = **-2616.607838**

D2

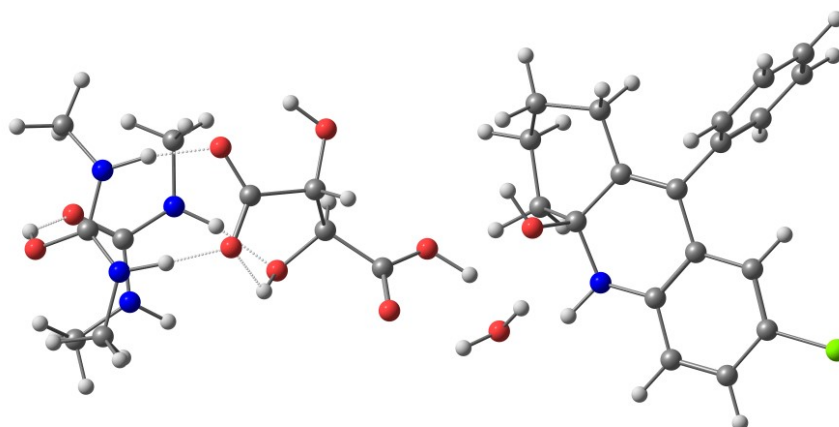

|    |          |          |          |
|----|----------|----------|----------|
| C  | -6.42297 | 3.52211  | -0.08135 |
| C  | -5.21801 | 3.10437  | -0.62766 |
| C  | -4.90513 | 1.72324  | -0.67453 |
| C  | -5.80373 | 0.76184  | -0.14049 |
| C  | -7.02142 | 1.20239  | 0.40659  |
| C  | -7.31138 | 2.56179  | 0.42567  |
| H  | -6.67925 | 4.58163  | -0.04292 |
| H  | -4.51578 | 3.83556  | -1.02503 |
| H  | -7.73260 | 0.48011  | 0.81618  |
| Cl | -8.80937 | 3.09278  | 1.09979  |
| C  | -5.42004 | -0.65174 | -0.15944 |
| O  | -1.37748 | 2.41902  | -0.05988 |
| C  | -6.39585 | -1.63669 | 0.37204  |
| C  | -7.35202 | -2.20509 | -0.48261 |
| C  | -6.36019 | -1.99769 | 1.72719  |
| C  | -8.26752 | -3.13341 | 0.02022  |
| H  | -7.38053 | -1.91762 | -1.53268 |
| C  | -7.27932 | -2.92651 | 2.22223  |
| H  | -5.62010 | -1.54977 | 2.38895  |
| C  | -8.23227 | -3.49549 | 1.37085  |
| H  | -9.01160 | -3.57374 | -0.64184 |
| H  | -7.25395 | -3.20585 | 3.27452  |
| H  | -8.94742 | -4.21786 | 1.75970  |
| N  | -3.73469 | 1.30939  | -1.34365 |
| H  | -3.00328 | 2.02603  | -1.46650 |
| H  | -0.78852 | 1.10957  | -0.70561 |
| H  | -1.83947 | 1.96682  | 0.67197  |
| C  | 7.78180  | 0.05808  | 1.47269  |
| O  | 8.92782  | 0.41451  | 0.84237  |
| N  | 7.13786  | 1.05094  | 2.16210  |
| N  | 7.42351  | -1.24758 | 1.58455  |
| C  | 7.53066  | 2.45961  | 1.94038  |
| H  | 8.62594  | 2.56273  | 1.83674  |

|   |          |          |          |
|---|----------|----------|----------|
| H | 7.05268  | 2.88218  | 1.03740  |
| H | 7.20913  | 3.04878  | 2.81870  |
| C | 8.25067  | -2.30748 | 0.97564  |
| H | 8.28397  | -2.22288 | -0.13366 |
| H | 9.28577  | -2.27768 | 1.35972  |
| H | 7.81706  | -3.29025 | 1.23328  |
| H | 6.41293  | -1.51713 | 1.86093  |
| H | 6.10868  | 0.89648  | 2.39543  |
| C | 4.15304  | -0.62582 | 1.39978  |
| O | 4.61380  | 0.52666  | 1.56693  |
| O | 4.78722  | -1.70046 | 1.54507  |
| C | 1.17396  | 0.94793  | -0.16141 |
| O | 1.08417  | 1.94470  | 0.54033  |
| O | 0.13145  | 0.49712  | -0.86290 |
| C | 2.41461  | 0.06584  | -0.34976 |
| C | 2.68637  | -0.75889 | 0.93229  |
| H | 2.28277  | -0.61612 | -1.22931 |
| H | 2.00025  | -0.48046 | 1.76684  |
| O | 3.49499  | 0.91443  | -0.71402 |
| H | 3.83525  | 1.42037  | 0.10534  |
| O | 2.38712  | -2.11394 | 0.60296  |
| H | 3.17084  | -2.69602 | 0.83359  |
| H | 8.98883  | -0.04185 | -0.11531 |
| C | 6.86298  | 0.07861  | -1.54628 |
| O | 7.96528  | -0.48165 | -1.36675 |
| N | 5.69432  | -0.63656 | -1.78507 |
| N | 6.74965  | 1.48629  | -1.49608 |
| C | 5.68587  | -2.09466 | -1.52987 |
| H | 4.91262  | -2.55988 | -2.16525 |
| H | 6.65992  | -2.54471 | -1.79181 |
| H | 5.46069  | -2.33035 | -0.46910 |
| C | 7.97956  | 2.27626  | -1.73953 |
| H | 7.77384  | 3.34047  | -1.54023 |
| H | 8.78108  | 1.94571  | -1.04959 |
| H | 8.36111  | 2.17496  | -2.76990 |
| H | 5.89358  | 1.91582  | -1.85805 |
| H | 4.77716  | -0.16844 | -1.64792 |
| C | -2.49102 | -0.48163 | -2.46905 |
| C | -2.32356 | -2.00082 | -2.60026 |
| C | -2.40268 | -2.70320 | -1.24140 |
| C | -3.78231 | -2.48548 | -0.60955 |
| C | -4.21665 | -1.04734 | -0.63230 |
| C | -3.21144 | -0.05495 | -1.17279 |
| H | -2.20098 | -3.78482 | -1.35263 |
| H | -3.10559 | -2.40646 | -3.27247 |
| H | -1.35552 | -2.22598 | -3.08826 |

|   |          |          |          |
|---|----------|----------|----------|
| H | -1.49252 | 0.00835  | -2.50043 |
| H | -3.04546 | -0.09226 | -3.34707 |
| H | -4.54061 | -3.10188 | -1.14142 |
| H | -3.78532 | -2.85850 | 0.43727  |
| H | -0.55076 | 2.80047  | 0.33836  |
| H | -1.60533 | -2.31611 | -0.56847 |
| O | -2.18165 | 0.13545  | -0.13290 |
| H | -1.64852 | -0.69195 | -0.00210 |

Zero-point corrected energy = **-2616.695182**

**TS3**

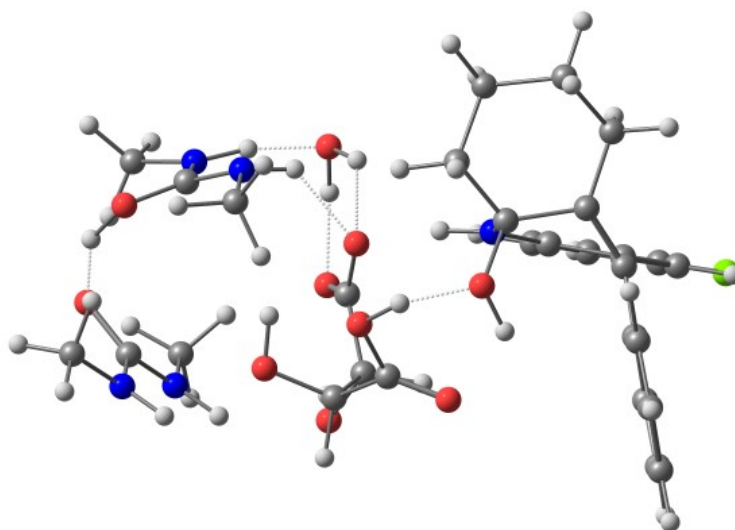

|   |         |          |          |
|---|---------|----------|----------|
| C | 4.19475 | -0.42252 | 0.41798  |
| C | 3.66651 | -0.93870 | 1.59644  |
| C | 4.57494 | -1.19923 | -0.74983 |
| C | 4.05019 | -0.40067 | 2.93743  |
| C | 2.23394 | -1.37728 | 1.41944  |
| C | 3.77933 | 0.98616  | 0.32166  |
| C | 5.00402 | -2.53074 | -0.57344 |
| C | 4.57034 | -0.64529 | -2.04652 |
| C | 3.40004 | -1.17980 | 4.08861  |
| H | 5.15594 | -0.44175 | 3.03645  |
| H | 3.78991 | 0.67933  | 3.01669  |
| C | 1.51051 | -1.98488 | 2.62598  |
| N | 1.60370 | -0.08430 | 0.96065  |
| O | 2.01624 | -2.36637 | 0.38281  |
| C | 4.49516 | 2.11361  | -0.03928 |
| C | 2.34318 | 1.04571  | 0.53863  |
| C | 5.41463 | -3.28953 | -1.67180 |
| H | 5.01266 | -2.96573 | 0.42680  |
| C | 4.98482 | -1.40865 | -3.13686 |

|    |          |          |          |
|----|----------|----------|----------|
| H  | 4.23012  | 0.38010  | -2.19741 |
| C  | 1.87823  | -1.25304 | 3.92019  |
| H  | 3.65250  | -0.69857 | 5.05246  |
| H  | 3.82518  | -2.20165 | 4.13580  |
| H  | 0.41517  | -1.97588 | 2.47141  |
| H  | 1.80231  | -3.05568 | 2.69312  |
| H  | 0.57531  | -0.01608 | 0.95552  |
| H  | 0.50306  | -2.62268 | 0.07483  |
| C  | 3.79796  | 3.31648  | -0.21677 |
| H  | 5.57514  | 2.06384  | -0.18574 |
| C  | 1.68382  | 2.26964  | 0.31444  |
| C  | 5.40780  | -2.73119 | -2.95293 |
| H  | 5.74146  | -4.31794 | -1.52751 |
| H  | 4.97393  | -0.97664 | -4.13662 |
| H  | 1.45055  | -0.23000 | 3.90941  |
| H  | 1.42155  | -1.76982 | 4.78515  |
| C  | 2.41465  | 3.40075  | -0.05527 |
| Cl | 4.68108  | 4.73140  | -0.65798 |
| H  | 0.60582  | 2.34530  | 0.45391  |
| H  | 5.72932  | -3.32279 | -3.80821 |
| H  | 1.90077  | 4.35151  | -0.21174 |
| C  | -0.09690 | -1.52960 | -1.50324 |
| C  | -1.34357 | -0.83629 | -2.05609 |
| O  | 1.03313  | -1.46472 | -1.93869 |
| O  | -0.39297 | -2.24816 | -0.39845 |
| C  | -1.20546 | 0.68733  | -1.88394 |
| H  | -1.49646 | -1.08310 | -3.14019 |
| O  | -2.50735 | -1.35412 | -1.42626 |
| C  | -1.62355 | 1.25231  | -0.50721 |
| O  | -2.06464 | 1.24897  | -2.88787 |
| H  | -0.15964 | 1.01584  | -2.11831 |
| O  | -2.30681 | 2.29913  | -0.54512 |
| O  | -1.24613 | 0.69007  | 0.55272  |
| H  | -2.34089 | 2.17064  | -2.59086 |
| N  | -2.99177 | -0.70608 | 2.17006  |
| C  | -2.72297 | -2.12444 | 1.84374  |
| C  | -4.22451 | -0.16093 | 1.83089  |
| H  | -2.23650 | -2.24098 | 0.84642  |
| H  | -3.64584 | -2.73258 | 1.86388  |
| H  | -2.03670 | -2.53152 | 2.60899  |
| N  | -4.44582 | 1.16885  | 1.95220  |
| O  | -5.18002 | -1.03373 | 1.53452  |
| C  | -5.80101 | 1.73783  | 1.83470  |
| H  | -5.96441 | -0.62883 | 0.81029  |
| H  | -6.48911 | 1.31031  | 2.58557  |
| H  | -6.23731 | 1.56437  | 0.82410  |

|   |          |          |          |
|---|----------|----------|----------|
| H | -5.74841 | 2.82846  | 2.00011  |
| C | -5.79062 | -2.73438 | -0.94401 |
| N | -5.16306 | -1.66318 | -1.74612 |
| H | -6.87307 | -2.53673 | -0.82122 |
| H | -5.34484 | -2.82343 | 0.06510  |
| H | -5.67865 | -3.69639 | -1.47119 |
| C | -5.40994 | -0.33629 | -1.40186 |
| H | -4.30174 | -1.91598 | -2.24323 |
| N | -4.82865 | 0.65848  | -2.16297 |
| O | -6.25557 | -0.04700 | -0.49298 |
| C | -5.11043 | 2.07501  | -1.84283 |
| H | -3.95445 | 0.48508  | -2.69082 |
| H | -6.09378 | 2.18663  | -1.35196 |
| H | -4.33063 | 2.50032  | -1.17479 |
| H | -5.13098 | 2.65526  | -2.78131 |
| O | -2.31213 | 2.75579  | 1.97523  |
| H | -1.58453 | 2.10030  | 1.85503  |
| H | -2.43237 | 3.11494  | 1.04715  |
| H | -2.36657 | -1.40208 | -0.42981 |
| H | 2.33194  | -2.05316 | -0.52735 |
| H | -3.61252 | 1.87468  | 2.07835  |
| H | -2.15762 | -0.08429 | 2.08396  |

Zero-point corrected energy = **-2616.621278**

**E**

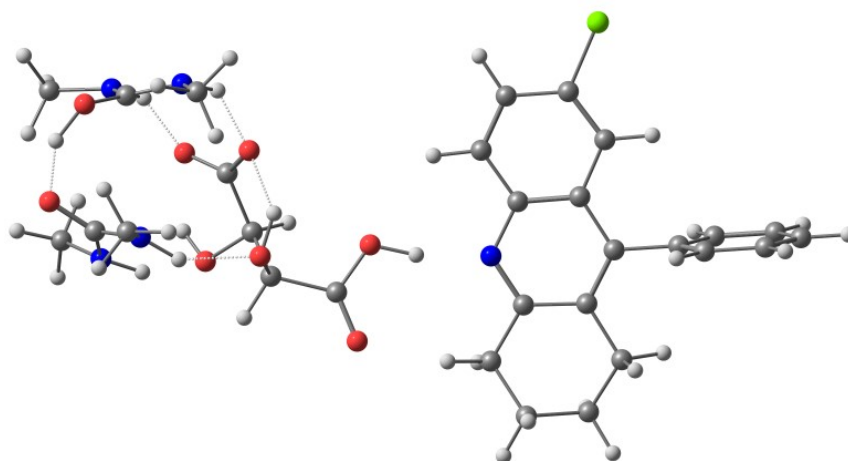

|   |         |         |          |
|---|---------|---------|----------|
| C | 2.52058 | 2.86995 | -0.66497 |
| C | 2.11545 | 1.56189 | -0.60080 |
| C | 3.08272 | 0.52788 | -0.37040 |
| C | 4.45611 | 0.84864 | -0.20187 |
| C | 4.85482 | 2.21777 | -0.27344 |
| C | 3.90106 | 3.17853 | -0.49912 |
| H | 1.80782 | 3.67782 | -0.84011 |



|    |          |          |          |
|----|----------|----------|----------|
| H  | 1.06293  | 1.27908  | -0.71930 |
| H  | 5.90836  | 2.47718  | -0.14732 |
| Cl | 4.36762  | 4.83750  | -0.58847 |
| C  | 5.37501  | -0.23125 | 0.03938  |
| C  | 6.81141  | 0.08549  | 0.23094  |
| C  | 7.31076  | 0.31592  | 1.52130  |
| C  | 7.66635  | 0.15668  | -0.87903 |
| C  | 8.66434  | 0.61563  | 1.69727  |
| H  | 6.64351  | 0.26482  | 2.38063  |
| C  | 9.01860  | 0.45638  | -0.69407 |
| H  | 7.27448  | -0.01830 | -1.88019 |
| C  | 9.51878  | 0.68545  | 0.59205  |
| H  | 9.05344  | 0.79678  | 2.69845  |
| H  | 9.68364  | 0.51337  | -1.55494 |
| H  | 10.57270 | 0.91982  | 0.73254  |
| N  | 2.63615  | -0.78891 | -0.31801 |
| C  | -6.12414 | 2.07564  | 0.39812  |
| O  | -7.09740 | 1.96483  | 1.32468  |
| N  | -4.92601 | 2.58772  | 0.81482  |
| N  | -6.39252 | 1.89306  | -0.92750 |
| C  | -4.65802 | 2.76233  | 2.25806  |
| H  | -5.58790 | 2.92252  | 2.83380  |
| H  | -4.12704 | 1.89061  | 2.68106  |
| H  | -4.01986 | 3.65698  | 2.38341  |
| C  | -7.76800 | 1.58914  | -1.36971 |
| H  | -8.14252 | 0.62432  | -0.96085 |
| H  | -8.46633 | 2.38715  | -1.05943 |
| H  | -7.78280 | 1.52794  | -2.47168 |
| H  | -5.59773 | 1.61919  | -1.59658 |
| H  | -4.06726 | 2.39837  | 0.21133  |
| C  | -3.51529 | 0.20657  | -1.19510 |
| O  | -3.14294 | 0.98766  | -0.28879 |
| O  | -4.49083 | 0.38066  | -1.96460 |
| C  | -0.76117 | -1.99425 | -0.06821 |
| O  | -0.11313 | -0.91360 | -0.53689 |
| O  | -0.17337 | -2.98228 | 0.31786  |
| C  | -2.29092 | -1.81220 | -0.09850 |
| C  | -2.76378 | -1.13133 | -1.39642 |
| H  | -2.77449 | -2.81986 | 0.01262  |
| H  | -1.92605 | -0.98090 | -2.11868 |
| O  | -2.66565 | -1.11541 | 1.07882  |
| H  | -2.47699 | -0.11206 | 0.96739  |
| O  | -3.69466 | -2.06754 | -1.97063 |
| H  | -4.24679 | -1.58368 | -2.65425 |
| H  | -7.62715 | 1.01780  | 1.20822  |
| C  | -6.44676 | -1.08152 | 0.65259  |

|   |          |          |          |
|---|----------|----------|----------|
| O | -7.56321 | -0.50821 | 0.74374  |
| N | -6.16000 | -1.94172 | -0.40768 |
| N | -5.46006 | -0.88575 | 1.61732  |
| C | -7.03692 | -1.89713 | -1.60050 |
| H | -6.97990 | -2.87317 | -2.11351 |
| H | -8.08931 | -1.73018 | -1.30501 |
| H | -6.73467 | -1.10276 | -2.30680 |
| C | -5.85887 | -0.48563 | 2.98338  |
| H | -4.95709 | -0.25296 | 3.57316  |
| H | -6.50354 | 0.41444  | 2.95366  |
| H | -6.41903 | -1.28366 | 3.50246  |
| H | -4.52056 | -1.31302 | 1.52381  |
| H | -5.17434 | -2.18546 | -0.62495 |
| C | 2.93197  | -3.17192 | -0.09787 |
| C | 3.85657  | -4.19467 | 0.56406  |
| C | 5.28581  | -4.04672 | 0.03527  |
| C | 5.85565  | -2.66840 | 0.38858  |
| C | 4.91699  | -1.53335 | 0.09481  |
| C | 3.50314  | -1.78268 | -0.09921 |
| H | 5.93484  | -4.83861 | 0.45451  |
| H | 3.83966  | -4.06497 | 1.66427  |
| H | 3.47622  | -5.21711 | 0.37486  |
| H | 2.71712  | -3.46977 | -1.14874 |
| H | 1.92559  | -3.18614 | 0.39890  |
| H | 6.11420  | -2.63558 | 1.47075  |
| H | 6.81766  | -2.51778 | -0.14771 |
| H | 0.95335  | -1.00443 | -0.47454 |
| H | 5.29925  | -4.19203 | -1.06282 |

Zero-point corrected energy = **-2616.70824**

**Images and optimized coordinates of the structures obtained reaction between stable intermediate with activated aldehyde**

**E+C complex**

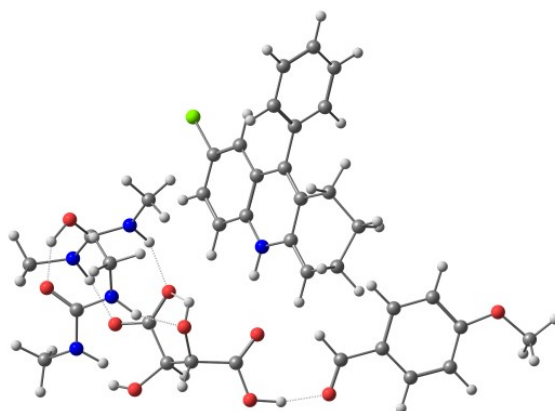

|    |             |            |             |
|----|-------------|------------|-------------|
| C  | 1.18150400  | 2.17895800 | 2.70931000  |
| C  | 0.64575800  | 1.15686400 | 1.94591900  |
| C  | -0.26293000 | 1.45758100 | 0.89612600  |
| C  | -0.62387500 | 2.80673500 | 0.61968600  |
| C  | -0.06245400 | 3.83128400 | 1.40330200  |
| C  | 0.82358300  | 3.50781600 | 2.42196900  |
| H  | 1.87252800  | 1.96254900 | 3.52555200  |
| H  | 0.92209200  | 0.11341500 | 2.14022100  |
| H  | -0.32705400 | 4.87426000 | 1.21069200  |
| Cl | 1.51140900  | 4.77342100 | 3.37344900  |
| C  | -1.56780900 | 3.07029100 | -0.46528200 |
| C  | -1.91368200 | 4.48498600 | -0.74788500 |
| C  | -1.21707300 | 5.19504000 | -1.73717000 |
| C  | -2.93746800 | 5.11352000 | -0.02245500 |
| C  | -1.54580300 | 6.52819300 | -1.99747900 |
| H  | -0.42242300 | 4.70649900 | -2.29739900 |
| C  | -3.26090600 | 6.44623400 | -0.28922500 |
| H  | -3.47356100 | 4.56045000 | 0.74778600  |
| C  | -2.56675800 | 7.15481800 | -1.27567300 |
| H  | -1.00419300 | 7.08022200 | -2.76394700 |
| H  | -4.05454500 | 6.93449000 | 0.27448700  |
| H  | -2.82001100 | 8.19328900 | -1.47992900 |
| N  | -0.78764900 | 0.41814900 | 0.12667000  |
| C  | 4.97228400  | 0.80386200 | 0.38500200  |
| O  | 5.68335000  | 1.38697500 | -0.60403700 |
| N  | 3.66598100  | 1.16368100 | 0.49492300  |
| N  | 5.59171800  | 0.05042300 | 1.34541500  |
| C  | 3.02590900  | 2.03821500 | -0.50807200 |
| H  | 3.75839200  | 2.69181700 | -1.01447800 |
| H  | 2.48944200  | 1.44715900 | -1.27192200 |

|   |             |             |             |
|---|-------------|-------------|-------------|
| H | 2.28895800  | 2.68402000  | 0.01318100  |
| C | 7.05532600  | -0.14253500 | 1.29622400  |
| H | 7.38341700  | -0.68859900 | 0.38408700  |
| H | 7.58001900  | 0.82953700  | 1.32304600  |
| H | 7.36661200  | -0.72502900 | 2.18068800  |
| H | 5.03199600  | -0.68823100 | 1.87936000  |
| H | 3.01416700  | 0.58266100  | 1.09690500  |
| C | 3.03558700  | -2.12974000 | 1.24956100  |
| O | 2.36525300  | -1.09245000 | 1.03388400  |
| O | 4.17945900  | -2.18419700 | 1.75243000  |
| C | 0.11800700  | -3.48524100 | -0.18852800 |
| O | -0.60949100 | -2.53776900 | 0.05244400  |
| O | -0.34751500 | -4.74006700 | -0.24402300 |
| C | 1.62297600  | -3.42749300 | -0.49126800 |
| C | 2.43865400  | -3.49298200 | 0.81433900  |
| H | 1.92598800  | -4.26096600 | -1.17967300 |
| H | 1.85549900  | -3.94317000 | 1.65062600  |
| O | 1.85075800  | -2.24970300 | -1.24357300 |
| H | 1.68772900  | -1.42553900 | -0.66014100 |
| O | 3.53194200  | -4.37640500 | 0.51426800  |
| H | 4.24556300  | -4.23843600 | 1.20516600  |
| H | 6.30842700  | 0.65456900  | -1.10174400 |
| C | 5.46459300  | -1.64277300 | -1.61477700 |
| O | 6.46940700  | -0.89518900 | -1.52248900 |
| N | 5.48688200  | -2.95565900 | -1.13805900 |
| N | 4.28667200  | -1.19526600 | -2.21214700 |
| C | 6.56408300  | -3.33122800 | -0.19247900 |
| H | 6.71185100  | -4.42380100 | -0.24571700 |
| H | 7.51672000  | -2.84645100 | -0.47458100 |
| H | 6.31550200  | -3.05040400 | 0.84886200  |
| C | 4.33688600  | -0.05573800 | -3.15182400 |
| H | 3.31004700  | 0.25435100  | -3.40605300 |
| H | 4.85827800  | 0.80591800  | -2.68985900 |
| H | 4.86918400  | -0.30941700 | -4.08563700 |
| H | 3.46266600  | -1.81174000 | -2.28481800 |
| H | 4.59299500  | -3.45378700 | -0.96595000 |
| C | -2.30780900 | -0.41060200 | -1.53829900 |
| C | -3.30900600 | -0.22680900 | -2.63284100 |
| C | -4.04363100 | 1.11640600  | -2.50613000 |
| C | -3.05201600 | 2.27415100  | -2.32894300 |
| C | -2.10370000 | 2.04977900  | -1.18262300 |
| C | -1.75581600 | 0.64341400  | -0.89384200 |
| H | -4.67339100 | 1.29357800  | -3.39714600 |
| H | -2.78877700 | -0.28386000 | -3.61326500 |
| H | -4.04097300 | -1.05856000 | -2.63230300 |
| H | -2.02432500 | -1.43897100 | -1.30727900 |

|   |              |             |             |
|---|--------------|-------------|-------------|
| H | -1.39167700  | -4.81364000 | -0.06206400 |
| H | -2.45412600  | 2.40366700  | -3.25719200 |
| H | -3.61083700  | 3.22415600  | -2.19679600 |
| H | -0.51284700  | -0.55580900 | 0.33448500  |
| H | -4.73436600  | 1.08429400  | -1.64118300 |
| C | -7.46785100  | -2.34266700 | 0.72123900  |
| C | -6.53021800  | -1.32906500 | 0.40814000  |
| C | -5.21149200  | -1.68837200 | 0.18767500  |
| C | -4.81477100  | -3.04241700 | 0.27226700  |
| C | -5.76441800  | -4.03022700 | 0.58793500  |
| C | -7.09782600  | -3.69362000 | 0.81357700  |
| H | -6.86215800  | -0.29422500 | 0.35175800  |
| H | -4.46880200  | -0.91851300 | -0.05325100 |
| H | -5.43875600  | -5.07426600 | 0.65395800  |
| H | -7.82013800  | -4.46584700 | 1.05560300  |
| C | -3.41493400  | -3.40763800 | 0.03837900  |
| O | -3.01382200  | -4.56712700 | 0.13222000  |
| H | -2.70998200  | -2.58836600 | -0.23718700 |
| O | -8.72911400  | -1.84951700 | 0.91206700  |
| C | -9.78895600  | -2.78129400 | 1.24928900  |
| H | -10.65359800 | -2.10981600 | 1.34071400  |
| H | -9.57216400  | -3.27339900 | 2.20182100  |
| H | -9.93406200  | -3.50016000 | 0.43788400  |

Zero-point corrected energy = **-2786.527853**

#### TS4

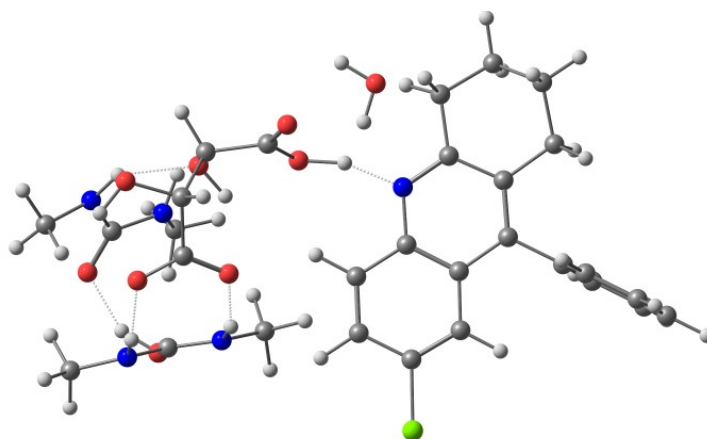

|   |          |         |         |
|---|----------|---------|---------|
| C | -0.84988 | 2.02981 | 1.01522 |
| C | -0.84014 | 0.72106 | 0.60734 |
| C | -2.05978 | 0.09969 | 0.18181 |
| C | -3.27976 | 0.82683 | 0.18625 |
| C | -3.26368 | 2.19126 | 0.60647 |
| C | -2.07548 | 2.75413 | 1.00109 |

|    |          |          |          |
|----|----------|----------|----------|
| H  | 0.06372  | 2.51774  | 1.36330  |
| H  | 0.09496  | 0.13355  | 0.61748  |
| H  | -4.19496 | 2.76230  | 0.61030  |
| Cl | -2.04012 | 4.40303  | 1.50618  |
| C  | -4.47630 | 0.14683  | -0.23256 |
| C  | -5.75800 | 0.89359  | -0.23108 |
| C  | -6.18215 | 1.55929  | -1.39042 |
| C  | -6.54124 | 0.93341  | 0.93213  |
| C  | -7.38984 | 2.26259  | -1.38262 |
| H  | -5.57024 | 1.53013  | -2.29054 |
| C  | -7.74767 | 1.63835  | 0.93088  |
| H  | -6.20678 | 0.41807  | 1.83223  |
| C  | -8.17307 | 2.30251  | -0.22448 |
| H  | -7.72036 | 2.78191  | -2.28128 |
| H  | -8.35681 | 1.67133  | 1.83366  |
| H  | -9.11327 | 2.85182  | -0.22151 |
| N  | -2.02301 | -1.23230 | -0.22940 |
| H  | -0.65504 | -1.91228 | -0.23236 |
| H  | -1.72540 | -3.28332 | 2.00036  |
| C  | 4.21789  | 2.37286  | -0.50349 |
| O  | 4.74548  | 2.70792  | -1.70439 |
| N  | 2.86551  | 2.25320  | -0.45052 |
| N  | 4.98497  | 2.34058  | 0.62743  |
| C  | 2.05429  | 2.34005  | -1.68053 |
| H  | 1.06478  | 1.88351  | -1.49470 |
| H  | 1.90831  | 3.39717  | -1.96976 |
| H  | 2.52860  | 1.81748  | -2.53171 |
| C  | 6.43785  | 2.59024  | 0.54513  |
| H  | 6.85581  | 2.58630  | 1.56742  |
| H  | 6.96852  | 1.81406  | -0.05012 |
| H  | 6.64530  | 3.57735  | 0.09546  |
| H  | 4.64558  | 1.76149  | 1.46907  |
| H  | 2.40949  | 1.79554  | 0.41132  |
| C  | 3.09297  | -0.26051 | 1.75863  |
| O  | 2.14763  | 0.35231  | 1.21188  |
| O  | 4.22142  | 0.22201  | 2.02847  |
| C  | 0.95165  | -2.69051 | 0.81532  |
| O  | 0.47199  | -2.04092 | -0.23743 |
| O  | 0.24576  | -3.27012 | 1.62337  |
| C  | 2.48120  | -2.59676 | 0.87723  |
| C  | 2.90819  | -1.75561 | 2.10300  |
| H  | 2.95401  | -3.61015 | 0.92807  |
| H  | 2.18597  | -1.88433 | 2.94643  |
| O  | 2.96715  | -2.05332 | -0.34974 |
| H  | 2.44056  | -1.22886 | -0.57827 |
| O  | 4.14206  | -2.31175 | 2.55625  |

|   |          |          |          |
|---|----------|----------|----------|
| H | 4.82994  | -1.58598 | 2.63061  |
| H | 5.63017  | 2.14631  | -1.89904 |
| C | 5.53553  | -0.37775 | -1.54416 |
| O | 6.27068  | 0.62558  | -1.67184 |
| N | 5.74417  | -1.33392 | -0.55498 |
| N | 4.43687  | -0.57974 | -2.40844 |
| C | 6.67156  | -1.01413 | 0.55412  |
| H | 7.05019  | -1.96022 | 0.97881  |
| H | 7.53558  | -0.43224 | 0.18781  |
| H | 6.16974  | -0.43686 | 1.35904  |
| C | 4.47737  | 0.07828  | -3.73490 |
| H | 4.73964  | 1.14839  | -3.62109 |
| H | 5.21601  | -0.37570 | -4.41759 |
| H | 3.47971  | 0.01498  | -4.19982 |
| H | 3.97632  | -1.49739 | -2.40246 |
| H | 4.96190  | -1.96250 | -0.28950 |
| C | -3.00570 | -3.30205 | -0.98697 |
| C | -4.20357 | -3.83680 | -1.77310 |
| C | -5.51163 | -3.42068 | -1.09471 |
| C | -5.65785 | -1.89523 | -1.08750 |
| C | -4.42257 | -1.17648 | -0.62479 |
| C | -3.14545 | -1.85682 | -0.61163 |
| H | -6.37670 | -3.87895 | -1.60946 |
| H | -4.17673 | -3.46379 | -2.81520 |
| H | -4.14008 | -4.94041 | -1.84040 |
| H | -2.88007 | -3.89318 | -0.02998 |
| H | -2.06438 | -3.48157 | -1.54705 |
| H | -5.91236 | -1.53526 | -2.10898 |
| H | -6.52466 | -1.61163 | -0.45108 |
| H | -5.53483 | -3.80804 | -0.05547 |
| O | -2.05898 | -4.16146 | 1.76536  |
| H | -1.27368 | -4.71973 | 1.76667  |

Zero-point corrected energy = **-2786.534605**

# H

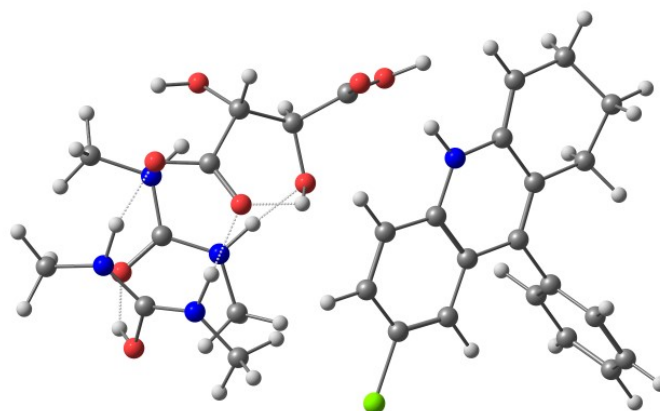

|    |          |          |          |
|----|----------|----------|----------|
| C  | 0.48342  | 1.38551  | -2.29729 |
| C  | 0.91791  | 0.07060  | -2.28506 |
| C  | 2.08511  | -0.27810 | -1.55647 |
| C  | 2.79924  | 0.70378  | -0.81414 |
| C  | 2.33995  | 2.03258  | -0.83854 |
| C  | 1.20258  | 2.34838  | -1.57063 |
| H  | -0.40483 | 1.66698  | -2.86431 |
| H  | 0.36153  | -0.69468 | -2.82996 |
| H  | 2.87618  | 2.80714  | -0.28383 |
| Cl | 0.64370  | 3.98606  | -1.59002 |
| C  | 3.96915  | 0.28310  | -0.04390 |
| C  | 4.70551  | 1.32631  | 0.71103  |
| C  | 4.38198  | 1.58144  | 2.05215  |
| C  | 5.72341  | 2.05886  | 0.08188  |
| C  | 5.07735  | 2.56613  | 2.75888  |
| H  | 3.58973  | 1.01253  | 2.53645  |
| C  | 6.41434  | 3.04148  | 0.79565  |
| H  | 5.96976  | 1.86002  | -0.96039 |
| C  | 6.09314  | 3.29620  | 2.13307  |
| H  | 4.82677  | 2.76503  | 3.79971  |
| H  | 7.20423  | 3.61077  | 0.30780  |
| H  | 6.63287  | 4.06256  | 2.68605  |
| N  | 2.53263  | -1.60255 | -1.57605 |
| C  | -4.58823 | 1.74018  | -0.68405 |
| O  | -4.85006 | 2.70867  | 0.21978  |
| N  | -3.44435 | 1.86803  | -1.41531 |
| N  | -5.53191 | 0.80127  | -0.99150 |
| C  | -2.46274 | 2.92503  | -1.09501 |
| H  | -2.89914 | 3.72991  | -0.47580 |
| H  | -1.58556 | 2.51127  | -0.56301 |
| H  | -2.11502 | 3.38166  | -2.04175 |
| C  | -6.84431 | 0.82461  | -0.31481 |



|   |          |          |          |
|---|----------|----------|----------|
| H | -6.75908 | 0.66670  | 0.78316  |
| H | -7.35608 | 1.78943  | -0.48386 |
| H | -7.47607 | 0.02226  | -0.73363 |
| H | -5.23063 | -0.12967 | -1.42259 |
| H | -3.06234 | 1.01258  | -1.91689 |
| C | -3.08609 | -1.51633 | -1.09418 |
| O | -2.36995 | -0.57775 | -1.51500 |
| O | -4.33670 | -1.56176 | -1.09869 |
| C | 0.08608  | -3.09384 | -0.14689 |
| O | 0.36765  | -3.32933 | -1.30165 |
| O | 0.93299  | -3.42247 | 0.86453  |
| C | -1.17502 | -2.41766 | 0.41915  |
| C | -2.39914 | -2.75006 | -0.45452 |
| H | -1.34383 | -2.74623 | 1.48038  |
| H | -2.16142 | -3.49745 | -1.24941 |
| O | -0.89682 | -1.03476 | 0.52012  |
| H | -0.97063 | -0.57742 | -0.40182 |
| O | -3.33434 | -3.34667 | 0.45985  |
| H | -4.25064 | -3.29769 | 0.04953  |
| H | -5.18368 | 2.27020  | 1.15489  |
| C | -4.19639 | 0.15988  | 2.04456  |
| O | -5.13470 | 0.98990  | 2.13687  |
| N | -4.43005 | -1.21199 | 2.15991  |
| N | -2.88388 | 0.57970  | 1.82591  |
| C | -5.82747 | -1.69238 | 2.05831  |
| H | -5.90717 | -2.65489 | 2.59339  |
| H | -6.52055 | -0.97809 | 2.54105  |
| H | -6.14231 | -1.83781 | 1.00968  |
| C | -2.48294 | 1.93743  | 2.25341  |
| H | -1.49777 | 2.17848  | 1.81899  |
| H | -3.21408 | 2.69071  | 1.90118  |
| H | -2.41200 | 2.02379  | 3.35189  |
| H | -2.11308 | -0.10209 | 1.71951  |
| H | -3.72980 | -1.88795 | 1.80363  |
| C | 3.91056  | -3.37367 | -0.72638 |
| C | 5.06735  | -3.88374 | 0.07378  |
| C | 6.13169  | -2.79410 | 0.27456  |
| C | 5.50820  | -1.50254 | 0.81904  |
| C | 4.35144  | -1.01988 | -0.01285 |
| C | 3.61593  | -2.05236 | -0.77010 |
| H | 6.92071  | -3.15056 | 0.96141  |
| H | 4.70622  | -4.24893 | 1.05783  |
| H | 5.52105  | -4.76118 | -0.42953 |
| H | 3.36351  | -4.11423 | -1.29962 |
| H | 1.82374  | -3.76608 | 0.54267  |
| H | 5.14779  | -1.66535 | 1.85836  |

|   |         |          |          |
|---|---------|----------|----------|
| H | 6.28900 | -0.71635 | 0.89320  |
| H | 1.99388 | -2.30196 | -2.10312 |
| H | 6.63232 | -2.58544 | -0.69191 |

Zero-point corrected energy = **-2786.535293**

**TS5**

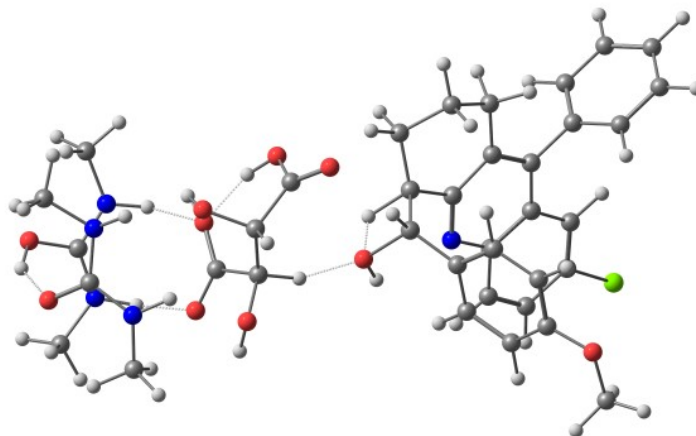

|    |          |          |          |
|----|----------|----------|----------|
| C  | -5.14010 | -0.46911 | 3.76374  |
| C  | -3.95771 | -0.45685 | 3.06887  |
| C  | -3.89067 | 0.16112  | 1.77573  |
| C  | -5.04678 | 0.77142  | 1.21551  |
| C  | -6.26805 | 0.74440  | 1.95359  |
| C  | -6.28922 | 0.13731  | 3.18406  |
| H  | -5.21813 | -0.93093 | 4.74800  |
| H  | -3.05078 | -0.90700 | 3.47393  |
| H  | -7.16225 | 1.20556  | 1.52887  |
| Cl | -7.76088 | 0.09460  | 4.08939  |
| C  | -4.91916 | 1.39671  | -0.07374 |
| C  | -6.10717 | 2.05736  | -0.66691 |
| C  | -6.36590 | 3.40935  | -0.39695 |
| C  | -6.97150 | 1.32744  | -1.49680 |
| C  | -7.48698 | 4.02671  | -0.95821 |
| H  | -5.69498 | 3.97218  | 0.25028  |
| C  | -8.09016 | 1.95223  | -2.05403 |
| H  | -6.76857 | 0.27689  | -1.70209 |
| C  | -8.34909 | 3.30064  | -1.78641 |
| H  | -7.68935 | 5.07590  | -0.74840 |
| H  | -8.76212 | 1.38632  | -2.69760 |
| H  | -9.22151 | 3.78417  | -2.22167 |
| N  | -2.67463 | 0.13862  | 1.10307  |
| C  | 6.77104  | 1.68315  | 1.83012  |
| O  | 8.07264  | 1.93178  | 1.57872  |

|   |          |          |          |
|---|----------|----------|----------|
| N | 5.87634  | 2.56100  | 1.29587  |
| N | 6.38822  | 0.72304  | 2.72356  |
| C | 6.33198  | 3.61082  | 0.36208  |
| H | 5.48000  | 3.95671  | -0.24906 |
| H | 6.73395  | 4.47246  | 0.92789  |
| H | 7.12918  | 3.25127  | -0.31535 |
| C | 7.40498  | -0.10008 | 3.40877  |
| H | 7.99184  | -0.72598 | 2.69944  |
| H | 8.10975  | 0.53445  | 3.97571  |
| H | 6.89760  | -0.77151 | 4.12373  |
| H | 5.40084  | 0.31991  | 2.67465  |
| H | 4.84830  | 2.30494  | 1.27519  |
| C | 3.84342  | -0.12473 | 0.67311  |
| O | 3.88233  | 1.11456  | 0.38836  |
| O | 4.31063  | -0.63137 | 1.70776  |
| C | 2.39001  | 0.35210  | -2.30847 |
| O | 2.26974  | 1.54267  | -1.67566 |
| O | 1.62937  | 0.09715  | -3.21148 |
| C | 3.51338  | -0.59091 | -1.82614 |
| C | 3.24212  | -1.06847 | -0.38921 |
| H | 3.61484  | -1.46920 | -2.51598 |
| H | 2.14011  | -1.22181 | -0.20384 |
| O | 4.76468  | 0.07646  | -1.95851 |
| H | 4.79250  | 0.88857  | -1.36616 |
| O | 3.89452  | -2.34205 | -0.29494 |
| H | 3.94594  | -2.60240 | 0.66467  |
| H | 8.60261  | 1.01902  | 1.35443  |
| C | 7.61600  | -0.61905 | -0.26570 |
| O | 8.45394  | -0.43217 | 0.64947  |
| N | 6.78868  | -1.73362 | -0.27965 |
| N | 7.47156  | 0.31610  | -1.30890 |
| C | 6.72452  | -2.58162 | 0.93285  |
| H | 6.42825  | -3.60193 | 0.63172  |
| H | 7.71295  | -2.64263 | 1.42252  |
| H | 5.98590  | -2.19469 | 1.66361  |
| C | 8.63340  | 1.17837  | -1.62613 |
| H | 9.04308  | 1.62657  | -0.70030 |
| H | 9.45233  | 0.62822  | -2.12142 |
| H | 8.30517  | 1.99423  | -2.29154 |
| H | 6.89308  | 0.05888  | -2.12166 |
| H | 5.92536  | -1.74341 | -0.85473 |
| C | -1.26079 | 0.61889  | -0.77400 |
| C | -1.04518 | 1.69366  | -1.81460 |
| C | -2.23281 | 1.73584  | -2.78297 |
| C | -3.53397 | 2.08418  | -2.04900 |
| C | -3.70713 | 1.37978  | -0.73375 |

|   |          |          |          |
|---|----------|----------|----------|
| C | -2.58683 | 0.70165  | -0.10686 |
| H | -2.04652 | 2.47258  | -3.58621 |
| H | -0.91711 | 2.67577  | -1.31884 |
| H | -0.09602 | 1.52187  | -2.37013 |
| H | -0.31111 | 0.52441  | 0.10761  |
| H | -0.27979 | -0.90869 | 0.84666  |
| H | -3.57243 | 3.18037  | -1.86119 |
| H | -4.39980 | 1.86840  | -2.71130 |
| H | 2.83963  | 1.63486  | -0.80612 |
| H | -2.33463 | 0.75477  | -3.28651 |
| C | -3.44466 | -4.10952 | -1.20606 |
| C | -3.13291 | -3.43438 | -2.40646 |
| C | -2.25316 | -2.36220 | -2.35735 |
| C | -1.68555 | -1.95220 | -1.13309 |
| C | -2.01136 | -2.63891 | 0.04124  |
| C | -2.89036 | -3.72652 | 0.02017  |
| H | -3.58342 | -3.76474 | -3.33925 |
| H | -2.00051 | -1.82978 | -3.27644 |
| H | -1.58138 | -2.31790 | 0.99358  |
| H | -3.13158 | -4.24364 | 0.94180  |
| C | -0.75803 | -0.78360 | -1.14816 |
| O | 0.22219  | -0.76534 | 0.00552  |
| H | -0.07977 | -0.79002 | -2.03148 |
| O | -4.32565 | -5.15014 | -1.39831 |
| C | -4.74494 | -5.90560 | -0.23634 |
| H | -5.43302 | -6.63658 | -0.68064 |
| H | -5.26753 | -5.25547 | 0.47141  |
| H | -3.88636 | -6.40370 | 0.22258  |

Zero-point corrected energy = **-2786.514513**

**PC**

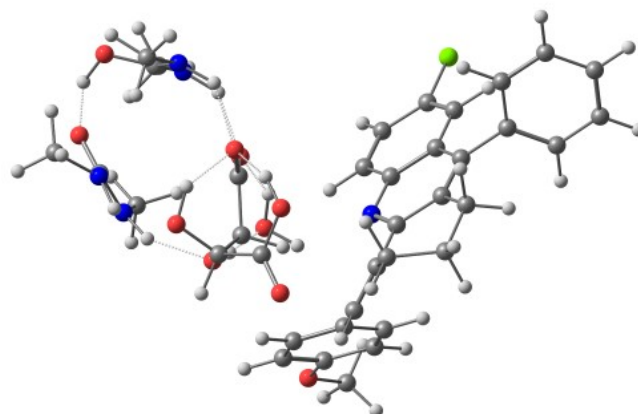

|    |             |             |             |
|----|-------------|-------------|-------------|
| C  | 2.57089200  | 0.19453900  | 3.50856400  |
| C  | 1.93491200  | 0.65175400  | 2.38370100  |
| C  | 2.35835200  | 0.20647000  | 1.08621000  |
| C  | 3.44083800  | -0.70825700 | 0.96748900  |
| C  | 4.08976700  | -1.17248800 | 2.15185900  |
| C  | 3.65088000  | -0.72306200 | 3.37131400  |
| H  | 2.26930200  | 0.52055300  | 4.50486600  |
| H  | 1.10634400  | 1.36484500  | 2.45086600  |
| H  | 4.92160700  | -1.87560700 | 2.06729700  |
| Cl | 4.42267100  | -1.27439300 | 4.81333800  |
| C  | 3.82076300  | -1.13032900 | -0.35197700 |
| C  | 4.91906500  | -2.11631500 | -0.49876000 |
| C  | 6.24316000  | -1.67406500 | -0.63710400 |
| C  | 4.63123600  | -3.48923400 | -0.49732300 |
| C  | 7.27464100  | -2.60666800 | -0.77486800 |
| H  | 6.46399700  | -0.60769500 | -0.63410400 |
| C  | 5.66874200  | -4.41513200 | -0.63565500 |
| H  | 3.60256400  | -3.82963700 | -0.38586500 |
| C  | 6.98948300  | -3.97610600 | -0.77490300 |
| H  | 8.30344000  | -2.26504700 | -0.88134900 |
| H  | 5.44693800  | -5.48161500 | -0.63391500 |
| H  | 7.79547300  | -4.70007000 | -0.88224100 |
| N  | 1.69470700  | 0.70691600  | -0.02888800 |
| C  | -4.10249300 | -2.82952600 | 1.54516700  |
| O  | -5.37003000 | -2.94710400 | 1.96314700  |
| N  | -3.74794400 | -3.52425900 | 0.41816000  |
| N  | -3.15530700 | -2.22753500 | 2.32500900  |
| C  | -4.79318800 | -4.16005800 | -0.41179400 |
| H  | -5.65587600 | -4.48518800 | 0.19955400  |
| H  | -5.16201900 | -3.47974400 | -1.19977800 |
| H  | -4.35786800 | -5.05600900 | -0.89181700 |
| C  | -3.51841000 | -1.67328700 | 3.64488400  |
| H  | -4.20850500 | -0.80377600 | 3.56264900  |
| H  | -4.00669900 | -2.43925100 | 4.27407100  |
| H  | -2.59977800 | -1.33931100 | 4.15769100  |
| H  | -2.27074100 | -1.85093000 | 1.88053800  |
| H  | -2.87159600 | -3.23012600 | -0.09566600 |
| C  | -2.04004100 | -0.67721900 | -0.46474400 |
| O  | -2.35340600 | -1.77100900 | -1.03363800 |
| O  | -1.76767600 | -0.57942100 | 0.74701000  |
| C  | -1.97369800 | -0.17039300 | -3.75735000 |
| O  | -1.55698200 | -1.45312100 | -3.57992000 |
| O  | -1.60629600 | 0.42196700  | -4.74116800 |
| C  | -2.85306600 | 0.43276600  | -2.63980900 |
| C  | -2.00153000 | 0.58225800  | -1.36106500 |
| H  | -3.26366500 | 1.42789300  | -2.95194300 |

|   |             |             |             |
|---|-------------|-------------|-------------|
| H | -0.92971400 | 0.79710900  | -1.61505000 |
| O | -4.01548500 | -0.36387200 | -2.47593500 |
| H | -3.77171800 | -1.27422500 | -2.10514600 |
| O | -2.52805400 | 1.71448900  | -0.68458100 |
| H | -1.91303900 | 1.93866800  | 0.15349900  |
| H | -5.77713000 | -1.95359400 | 2.26653300  |
| C | -5.36291600 | 0.09512400  | 1.07751700  |
| O | -5.75522000 | -0.43174300 | 2.15626400  |
| N | -4.61834800 | 1.25842600  | 1.07081900  |
| N | -5.65725900 | -0.50295000 | -0.16113300 |
| C | -3.99929000 | 1.74185300  | 2.32504300  |
| H | -4.02646900 | 2.84675000  | 2.32695700  |
| H | -4.55298900 | 1.38607600  | 3.21160200  |
| H | -2.94145600 | 1.42287600  | 2.40471300  |
| C | -6.91653900 | -1.27382600 | -0.27647300 |
| H | -6.96125200 | -1.74707400 | -1.27125900 |
| H | -6.94938700 | -2.07140900 | 0.49166000  |
| H | -7.81525200 | -0.64556200 | -0.14933400 |
| H | -5.36092900 | -0.02422800 | -1.03269000 |
| H | -4.11491600 | 1.55256600  | 0.19904000  |
| C | 1.41562000  | 0.92604700  | -2.42932500 |
| C | 1.37072100  | -0.00986100 | -3.60932300 |
| C | 2.80678100  | -0.39157300 | -3.97980800 |
| C | 3.49901200  | -1.13304300 | -2.83062500 |
| C | 3.15910000  | -0.62950900 | -1.45678000 |
| C | 2.09680800  | 0.33913800  | -1.24770300 |
| H | 2.80758500  | -1.02371700 | -4.88880500 |
| H | 0.77039100  | -0.91563900 | -3.36918800 |
| H | 0.84811500  | 0.44227000  | -4.48007800 |
| H | 0.01024200  | 2.07149900  | 0.75633800  |
| H | -0.78305700 | 0.82782000  | 1.28397300  |
| H | 3.23011800  | -2.21364300 | -2.87544600 |
| H | 4.60018800  | -1.10123500 | -2.98135400 |
| H | -1.84858600 | -1.87973900 | -2.68421000 |
| H | 3.37789800  | 0.52078400  | -4.24351100 |
| C | 0.96583200  | 5.28518200  | 0.37742100  |
| C | -0.26082900 | 4.88254200  | -0.19373800 |
| C | -0.25672900 | 3.85970100  | -1.13185100 |
| C | 0.95023600  | 3.22558000  | -1.49658900 |
| C | 2.15467500  | 3.64210300  | -0.91357300 |
| C | 2.17597800  | 4.67636500  | 0.02780200  |
| H | -1.18065300 | 5.37918300  | 0.10724400  |
| H | -1.19993000 | 3.53350400  | -1.58095000 |
| H | 3.08812200  | 3.15451400  | -1.19550800 |
| H | 3.11745000  | 4.98685100  | 0.46668100  |
| C | 0.92497700  | 2.17407300  | -2.52157800 |

|   |             |            |             |
|---|-------------|------------|-------------|
| O | -0.79607000 | 1.82311400 | 1.25934700  |
| H | 0.44390500  | 2.49351900 | -3.45805300 |
| O | 0.81539000  | 6.31093100 | 1.28539600  |
| C | 2.00518500  | 6.81867100 | 1.93487800  |
| H | 1.59051500  | 7.60526300 | 2.57878800  |
| H | 2.69188000  | 7.23994300 | 1.19519200  |
| H | 2.47787000  | 6.03296000 | 2.53085700  |

Zero-point corrected energy = **-2786.540556**
